# Supplementary material for: The relationship between bicycle commuting and perceived stress: a cross-sectional study
Source: PubMed Central journal article supplement — BMJ Open. 2017 Jun 23;7(6):e013542. doi: 10.1136/bmjopen-2016-013542 (PMC5541523; doi:10.1136/bmjopen-2016-013542), 2017-06-23
Supplement: bmjopen-2016-013542.draft_revisions.pdf [file bmjopen-2016-013542.draft_revisions.pdf]

# BMJ Open

## THE RELATIONSHIP BETWEEN BICYCLE COMMUTING AND PERCEIVED STRESS: A CROSS-SECTIONAL STUDY

|                                 |                                                                                                                                                                                                                                                                                                                                                                                                                                                                                                                                                                                                                                                                          |
|---------------------------------|--------------------------------------------------------------------------------------------------------------------------------------------------------------------------------------------------------------------------------------------------------------------------------------------------------------------------------------------------------------------------------------------------------------------------------------------------------------------------------------------------------------------------------------------------------------------------------------------------------------------------------------------------------------------------|
| Journal:                        | <i>BMJ Open</i>                                                                                                                                                                                                                                                                                                                                                                                                                                                                                                                                                                                                                                                          |
| Manuscript ID                   | bmjopen-2016-013542                                                                                                                                                                                                                                                                                                                                                                                                                                                                                                                                                                                                                                                      |
| Article Type:                   | Research                                                                                                                                                                                                                                                                                                                                                                                                                                                                                                                                                                                                                                                                 |
| Date Submitted by the Author:   | 19-Jul-2016                                                                                                                                                                                                                                                                                                                                                                                                                                                                                                                                                                                                                                                              |
| Complete List of Authors:       | Avila-Palencia, Ione; ISGlobal, Centre for Research in Environmental Epidemiology (CREAL), de Nazelle, Audrey; Centre for Environmental Policy, Imperial College of London<br>Cole-Hunter, Tom; ISGlobal, Centre for Research in Environmental Epidemiology (CREAL). Barcelona, Spain<br>Donaire-Gonzalez, David; ISGlobal, Centre for Research in Environmental Epidemiology (CREAL)<br>Jerrett, Michael; University of California Los Angeles, Department of Environmental Health Sciences<br>Rodriguez, Daniel; University of North Carolina, City and Regional Planning<br>Nieuwenhuijsen, Mark; ISGlobal, Centre for Research in Environmental Epidemiology (CREAL) |
| <b>Primary Subject Heading</b>: | Epidemiology                                                                                                                                                                                                                                                                                                                                                                                                                                                                                                                                                                                                                                                             |
| Secondary Subject Heading:      | Mental health, Public health                                                                                                                                                                                                                                                                                                                                                                                                                                                                                                                                                                                                                                             |
| Keywords:                       | EPIDEMIOLOGY, MENTAL HEALTH, PUBLIC HEALTH                                                                                                                                                                                                                                                                                                                                                                                                                                                                                                                                                                                                                               |
|                                 |                                                                                                                                                                                                                                                                                                                                                                                                                                                                                                                                                                                                                                                                          |

SCHOLARONE™  
Manuscripts

# THE RELATIONSHIP BETWEEN BICYCLE COMMUTING AND PERCEIVED STRESS: A CROSS-SECTIONAL STUDY

Ione Avila-Palencia, MPH<sup>1,2,3</sup>; Audrey de Nazelle, PhD<sup>4</sup>; Tom Cole-Hunter, PhD<sup>1,2,3</sup>; David Donaire-Gonzalez, PhD<sup>1,3,5</sup>; Michael Jerrett, PhD<sup>6</sup>; Daniel A. Rodriguez, PhD<sup>7</sup>; Mark J Nieuwenhuijsen, PhD<sup>1,2,3</sup>

## Author's affiliations:

<sup>1</sup>ISGlobal, Centre for Research in Environmental Epidemiology (CREAL). Barcelona, Spain.

<sup>2</sup>Universitat Pompeu Fabra (UPF). Barcelona, Spain.

<sup>3</sup>CIBER Epidemiología y Salud Pública (CIBERESP), Barcelona, Spain.

<sup>4</sup>Centre for Environmental Policy, Imperial College of London, London, United Kingdom.

<sup>5</sup>Physical Activity and Sports Sciences Department, Fundació Blanquerna, Ramon Llull University. Barcelona, Spain.

<sup>6</sup>Department of Environmental Health Sciences, University of California, Los Angeles, California, United States of America.

<sup>7</sup>Department of City and Regional Planning, University of North Carolina at Chapel Hill. Chapel Hill, North Carolina, United States of America.

## Corresponding author information:

Ione Avila-Palencia, ISGlobal, Centre for Research in Environmental Epidemiology (CREAL), Doctor Aiguader, 88, 08003 Barcelona, Spain. Telephone (+34) 93 2147337; Fax (+34) 93 2147302; E-mail: [ione.avila@isglobal.org](mailto:ione.avila@isglobal.org)

**Keywords:** Environmental epidemiology, Physical activity, Stress, Urbanisation, Self-rated health

**Word count of main text:** 2919

## ABSTRACT

**Introduction:** Active commuting –walking and bicycling for travel to and from work or educational addresses– may facilitate daily routine physical activity. Several studies have investigated the relationship between active commuting and commuting stress, but there is no literature studying the relationship between bicycle commuting and perceived stress, nor taking into account environmental determinants. The current study evaluated the relationship between bicycle use for commuting among working or studying adults in Barcelona (Spain) and perceived stress.

**Methods:** A cross-sectional study was performed with 788 adults who regularly travelled to work or study locations in Barcelona. Participants responded to a comprehensive telephone survey concerning their travel behaviour from June 2011 through to May 2012. Participants were categorised as either bicycle commuters or non-bicycle commuters, and based on the Perceived Stress Scale (PSS-4) as stressed or non-stressed. Multivariate logistic regression models of stress status based on bicycling exposure, adjusting for potential confounders, were estimated. The data was analyzed between May and October 2015.

**Results:** Bicycle commuters had significantly lower odds of being stressed [OR (95%CI) = 0.61 (0.46, 0.83)]. Bicycle commuters who bicycled four or more days per week had lower perceived stress than those who bicycled less than that. This relationship remained significant when adjusting by individual and environmental determinants, and when using a different cut-off of perceived stress (P50, P75, P90).

**Conclusions:** Stress reduction may be an important consequence of routine bicycle use and may need to be considered by decision makers as another potential benefit of bicycle use.

## STRENGTHS AND LIMITATIONS OF THIS STUDY

- The study had high internal validity, with a good representation of bicycle commuters.
- The study was conducted in Barcelona (a southern European city), adding evidence in a different context than the current literature on these issues.
- The TAPAS Travel Survey sample is representative of Barcelona's population, taking into account deprivation index and home and work population density.
- The study used a cross-sectional design, which is not well-suited to assess the direction of causation.
- Using questionnaire data we could have misclassification error (information bias) of bicycle commuting and PA because of the data being self-reported.

## INTRODUCTION

Increasing physical activity (PA) is one of the key approaches to reduce non-communicable diseases. In 2010, physical inactivity and low PA accounted globally for approximately three million premature deaths, and 2.8% (2.4–3.2) of DALYs.(1) Active commuting – walking and bicycling for travel to and from work or educational addresses – seems to be well suited to increase physical activity levels in general population,(2,3) as it needs less time and motivation. Emerging literature is exploring the health benefits of active commuting. It has been suggested that greater time spent actively commuting is associated with higher levels of physical and mental well-being(4,5) and better mental health in men.(6) Specifically bicycle commuting has been shown as inversely associated with all-cause mortality among both men and women in all age groups(7) and it seems to be likely to improve the health-related quality of life in previously untrained healthy adults.(8)

Perceived stress presents a global and comprehensive stress construct that refers to the interaction between the individual and the environment when a stressor occurs.(9) The perception of an event as stressful can result in a range of physiological, behavioural, and psychological changes, such as cardiovascular disease, increased negative affect, lowered self-esteem, and lowered feelings of control. Hence, anxiety disorders and depression can be manifestations of chronic (perceived) stress.(10) It has been suggested that moderate-intensity physical activity may reduce stress and anxiety on a daily basis while improving self-perception and mood.(11,12) Some literature recognise commuting as a potential source of stress,(13) but recent qualitative research suggests that commuting is often perceived as a relaxing or transitional time between home and work life, which can also be about enjoying pleasant landscape, nature and wildlife.(14) Active commuters have shown higher levels of satisfaction, less stress, relaxation and a sense of freedom than car drivers.(15–17) The use of

1  
2  
3 a bicycle for commuting has been also considered a fast transport mode and associated with a  
4 sense of freedom too.(18) Reinforcing the argument of pleasantness and practicality for  
5 bicycle commuting, objective measurements found that the quantity of public bicycle (*Bicing*)  
6 stations within the home area, and amount of greenness within the work/study area were  
7 positive determinants of propensity for bicycle commuting.(19)  
8  
9  
10  
11  
12

13  
14  
15  
16 Several studies have investigated the relationship between active commuting and commuting  
17 stress (stress directly related with the fact of commuting),(16,17,20,21) a few studies have  
18 investigated the relationship between active commuting and well-being,(4–6) but none of  
19 them have studied the relationship between adult bicycle commuters and perceived stress, nor  
20 taking into account environmental determinants. Moreover, most studies of active commuting  
21 benefits on mental health have been conducted in North America or Northwest Europe.(4–  
22 6,16,21,22) Consequently, there is a need to better understand the relationship between  
23 bicycle commuting and perceived stress, and specifically in a sample of residents in a  
24 Southern European city.  
25  
26  
27  
28  
29  
30  
31  
32  
33  
34  
35  
36  
37

38 The current study aimed to evaluate the relationship between bicycle commuting among the  
39 working or studying adult population of Barcelona (Spain) and perceived stress.  
40  
41  
42  
43  
44  
45

## 46 **MATERIALS AND METHODS**

### 47 **Study population**

48  
49 This cross-sectional study was based on participants from the Transportation, Air Pollution  
50 and Physical Activities (TAPAS) Travel Survey. TAPAS was a large study that investigated  
51 the risks and benefits of active commuting. Adult bicycle commuters and non-bicycle  
52  
53  
54  
55  
56  
57  
58  
59  
60

1  
2  
3 commuters who fulfilled the inclusion criteria (being older than 18 years of age; living in  
4 Barcelona city since 2006 or earlier; working or going to school in Barcelona city; being  
5 healthy enough to ride a bicycle for 20 minutes; having at least 10 minutes of walking  
6 commute; and using at least one mode of transport other than walking to commute) were  
7 recruited between June 2011 and May 2012. Participants were recruited from four randomly-  
8 selected locations within each of the ten city districts across Barcelona (for a total of 40  
9 locations) to ensure adequate geographic coverage. In the recruitment process, pedestrians  
10 were excluded from the non-bicycle commuters as the main interest was in the contrast of  
11 motorized modes (private and public transportation) and the bicycle. Further details of the  
12 recruitment are given in Donaire-Gonzalez et al 2015.(3)  
13  
14  
15  
16  
17  
18  
19  
20  
21  
22  
23  
24  
25  
26

27 The study protocol was approved by the Clinical Research Ethical Committee of the Parc de  
28 Salut Mar (CEIC-Parc de Salut Mar), and written informed consent was obtained from all  
29 participants.  
30  
31  
32  
33  
34  
35

### 36 **Bicycle commuters**

37  
38 The TAPAS Travel Survey assessed the common use of transport modes(23) and the bicycle  
39 use.(24) Participants who indicated use bicycle (private or from public bike sharing system)  
40 as transport at least once the week prior to survey administration were classified as “bicycle  
41 commuters”. Participants who indicated use bicycle (private or from public bike sharing  
42 system) as transport and did not commute by bicycle in the week prior to survey  
43 administration were classified as “non-bicycle commuters”.  
44  
45  
46  
47  
48  
49  
50  
51  
52  
53  
54  
55  
56  
57  
58  
59  
60

1  
2  
3 As part of the sensitivity analyses, the commuting behaviour was also classified by three  
4  
5 different bicycle commuting levels taking into account the frequencies of bicycle commuting  
6  
7 use and by bicycle commuting propensity.(19)  
8  
9

10  
11 Regarding bicycle commuting levels, “Bicycle commuters” were further classified as “low  
12  
13 bicycle commuters”, “medium bicycle commuters” and “high bicycle commuters”. “Bicycle  
14  
15 commuters” who commuted by bicycle on five or more days in the week prior to survey  
16  
17 administration were classified as “high bicycle commuting”. Those who had commuted by  
18  
19 bicycle on four days in the week prior to survey administration were classified as “medium  
20  
21 bicycle commuting”. Finally, those who commuted by bicycle on three days or fewer in the  
22  
23 week prior to survey administration were classified as “low bicycle commuting”.  
24  
25  
26  
27

28  
29 Regarding bicycle commuting propensity, details of the classification are given in Cole-  
30  
31 Hunter et al 2015.(19)  
32  
33  
34  
35

### 36 **Perceived stress**

37  
38 The last four questions of the TAPAS Travel Survey were the short version of Perceived  
39  
40 Stress Scale (PSS-4),(9) which is an economical and simple psychological instrument to  
41  
42 administer, comprehend, and score. PSS-4 measures the degree to which situations in one’s  
43  
44 life over the past month are appraised as stressful. The instrument contains four statements,  
45  
46 which measure how unpredictable, uncontrollable, and overloaded respondents feel that their  
47  
48 lives are (Table S1). The higher the score on the PSS-4 (from 0 to 16), the greater the  
49  
50 respondent perceives that their demands exceed their ability to cope. There are no cut-off  
51  
52 scores. Instead, an individual’s score is compared to a normative value.(25) In the TAPAS  
53  
54 Travel Survey the 5-point Likert scale was modified to a 4-point Likert scale, removing the  
55  
56  
57  
58  
59  
60



1  
2  
3 midpoint option for consistency across the survey, because all of other questions from the  
4 survey were on a 4-point Likert scale. Participants assigned a PSS-4 score higher than 3  
5 (median of the total sample) were classified as “stressed”, and those equal or lower than 3  
6 were classified as “non-stressed”.  
7  
8  
9  
10

11  
12  
13  
14 As part of the sensitivity analyses, the PSS-4 score was also classified separately by percentile  
15 75 (P75) and percentile 90 (P90): participants assigned a PSS-4 score higher than 4 (P75) and  
16 6 (P90) were classified as “stressed”, and those who got a PSS-4 score equal or lower than 4  
17 and 6 were classified as “non-stressed” in respective, separate analyses.  
18  
19  
20  
21  
22  
23

### 24 **Other explanatory measures**

25  
26 Individual determinants such as physical activity levels,(26) socio-demographic variables, and  
27 work or school addresses were also derived from the TAPAS Travel Survey. In addition, the  
28 MEDEA Index was used as an area deprivation indicator assigned to each respondent’s  
29 address. MEDEA measures deprivation at the census tract level based on five domains  
30 including percentage of manual workers, temporary workers, total population with low  
31 education, young population with low education, and unemployment.(27)  
32  
33  
34  
35  
36  
37  
38  
39  
40  
41  
42

43 Environmental determinants within a 400m buffer surrounding home and work/study  
44 addresses, and a Route-By-Area (RBA) surrounding predicted commute routes, were  
45 calculated.(19) Greenness was calculated as a mean and percentiles in Normalized Difference  
46 Vegetation Index (NDVI) via satellite imagery (LANDSAT 4 and 5, NASA). NO2 levels  
47 were estimated as a mean and percentiles using a land-use regression model developed for a  
48 previous project.(28) Noise was calculated as a mean and percentiles in dB(A) level  
49 equivalent (LAeq) modeled using measured noise and transit data from Barcelona’s strategic  
50  
51  
52  
53  
54  
55  
56  
57  
58  
59  
60

1  
2  
3 noise map developed in the year 2007(29) based upon previous work.(30) The noise variable  
4 used for analyses was the proportion of street length above a 55 dB(A) threshold.(31) Also  
5 measured were bicycle parking and lanes digitized from existing maps.(32) A bikeability  
6 index was calculated taking into account five factors shown to influence bicycling: bicycle  
7 facility availability, bicycle facility quality, street connectivity, topography, and land use.(33)  
8 Further details of the environmental determinants calculation are given in Cole-Hunter et al  
9  
10  
11  
12  
13  
14  
15  
16  
17  
18  
19  
20  
21  
22  
23  
24  
25  
26  
27  
28  
29  
30  
31  
32  
33  
34  
35  
36  
37  
38  
39  
40  
41  
42  
43  
44  
45  
46  
47  
48  
49  
50  
51  
52  
53  
54  
55  
56  
57  
58  
59  
60

### Statistical analyses

A GAM was used to test linearity between bicycle commuters and perceived stress. Multivariate logistic regression models were used to assess the relationship between bicycle commuters and perceived stress. Possible mediation by different levels of PA between bicycle commuters and perceived stress, and any interaction between sex and bicycle commuters were also tested with logistic regression models. All regression models were conducted with a complete case analysis and included potential confounders that showed a p-value <0.05 in the bivariate analysis as well as those found to be statistically-significant within previous literature. All statistical analyses were conducted in Stata version SE 12 (StataCorp LP, Texas USA) between May and October 2015.

## RESULTS

The TAPAS database consisted of 789 subjects. After excluding one PA outlier (total of all walking, moderate and vigorous time variables >960 minutes/day) 788 remained. The included sample had an equal distribution of sexes and the median age (interquartile range, IQR) was 36 (14) years (Table 1). The majority of subjects were non-stressed (had a stress score equal or lower than 3), Spanish, possessing university studies completed or equivalent-

1  
2  
3 level education, living with their family or partner, living with at least 2 employed people and  
4  
5 not with children (64.34%). Among those living with children, 8.12% had children younger  
6  
7 than 3 years of age. The sample had positive self-perception of health (with only <1% of  
8  
9 subjects self-perceiving bad or very bad health), healthy weight according to BMI (71.12%),  
10  
11 and generally no chronic disease (92.26%). Bicycle commuters were statistically-significant  
12  
13 more likely to be non-stressed, younger (35 years), male, and non-Spanish; to possess  
14  
15 university studies completed or equivalent-level education; to live alone and/or with flat  
16  
17 mates, with 0-1 employed people, and no children; and to have higher levels of PA, better  
18  
19 self-perception of health, and healthy weight, but more chronic diseases than non-bicycle  
20  
21 commuters. The majority of subjects considered that they could release stress when riding a  
22  
23 bicycle and that they enjoyed their trip more if they used a bicycle. Related to environmental  
24  
25 determinants, bicycle commuters had shorter commutes, more public bicycle stations around  
26  
27 the home and work/study address, lower average greenness around the home address, and  
28  
29 higher levels of bikeability at home and work/study address compared with non-bicycle  
30  
31 commuters.  
32  
33  
34  
35  
36  
37

38  
39 Females and non-Spanish and those living with less than 2 employed people were more likely  
40  
41 to be stressed (Table 2). Related to environmental determinants, participants who had more  
42  
43 public bicycle stations around their work/study area and higher levels of bikeability in the  
44  
45 work/study address area and on the commute route were less likely to be stressed. There was  
46  
47 no statistically-significant relationship between commute distance, greenness, NO<sub>2</sub> and noise,  
48  
49 and perceived stress. The possible mediation of PA was not further explored as there was no  
50  
51 statistically-significant relationship between levels of PA (Total PA, MVPA and VPA) and  
52  
53 perceived stress [OR: 1.00; 95% CI: (0.99, 1.00)] for the three different classifications of  
54  
55 perceived stress (P50, P75, P90) (Table 2, Table S3).  
56  
57  
58  
59  
60

**Table 1.** Perceived stress and determinants of participants and according to bicycle commuting status.

| Variables                                                                    | Total sample (788) |        | Bicycle commuting status    |        |                         |        | p-value <sup>a</sup> |
|------------------------------------------------------------------------------|--------------------|--------|-----------------------------|--------|-------------------------|--------|----------------------|
|                                                                              | n                  | %      | Non-bicycle commuters (390) |        | Bicycle commuters (398) |        |                      |
|                                                                              |                    |        | n                           | %      | n                       | %      |                      |
| <b>Outcome</b>                                                               |                    |        |                             |        |                         |        |                      |
| Stressed (median) (Yes)                                                      | 280                | 35.53  | 162                         | 41.97  | 118                     | 30.33  | 0.001                |
| <b>Individual determinants</b>                                               |                    |        |                             |        |                         |        |                      |
| Age (median; IQR)                                                            | 36                 | 14     | 37                          | 15     | 35                      | 12     | 0.025                |
| Total PA – min/week (median;IQR)                                             | 424.99             | 430.00 | 374.99                      | 415.00 | 484.98                  | 405.00 | <0.001               |
| MVPA – min/week (median;IQR)                                                 | 197.49             | 302.49 | 90.00                       | 240.00 | 299.99                  | 305.00 | <0.001               |
| VPA – min/week (median;IQR)                                                  | 72.50              | 180.00 | 35.00                       | 134.99 | 105.00                  | 225.00 | <0.001               |
| Sex (Female)                                                                 | 410                | 52.03  | 234                         | 60.00  | 176                     | 44.22  | <0.001               |
| Country of birth (non-Spanish)                                               | 97                 | 12.31  | 41                          | 10.51  | 56                      | 14.11  | 0.125                |
| Working status (Student)                                                     | 104                | 13.20  | 347                         | 87.19  | 51                      | 12.81  | 0.748                |
| Education level (University studies completed or equivalent-level education) | 551                | 69.92  | 247                         | 63.33  | 304                     | 76.38  | <0.001               |
| Living with family/partner                                                   | 635                | 80.58  | 327                         | 83.85  | 308                     | 77.58  | 0.026                |
| Employed people in household (>2)                                            | 510                | 64.72  | 261                         | 67.27  | 249                     | 62.88  | 0.198                |
| MEDEA index                                                                  |                    |        |                             |        |                         |        | 0.355                |
| 1st tertile (least deprived)                                                 | 263                | 33.38  | 130                         | 33.33  | 133                     | 33.42  |                      |
| 2nd tertile                                                                  | 263                | 33.38  | 122                         | 31.28  | 141                     | 35.43  |                      |
| 3rd tertile (most deprived)                                                  | 262                | 33.25  | 138                         | 35.38  | 124                     | 31.16  |                      |
| Children in household (Yes)                                                  | 279                | 35.41  | 151                         | 38.82  | 128                     | 32.24  | 0.054                |
| Children <3 years in household (Yes)                                         | 64                 | 8.12   | 36                          | 9.25   | 28                      | 7.07   | 0.264                |
| Self-perceived health (Very good/Excellent)                                  | 323                | 40.99  | 140                         | 35.90  | 183                     | 45.98  | 0.004                |
| BMI (Overweight/Obese)                                                       | 212                | 26.9   | 124                         | 31.96  | 88                      | 22.11  | 0.002                |
| Chronic disease (Yes)                                                        | 61                 | 7.74   | 25                          | 6.41   | 36                      | 9.05   | 0.166                |
| Stress releasing (Agreement)                                                 | 658                | 83.50  | 302                         | 79.47  | 356                     | 90.59  | <0.001               |
| Bicycle trip enjoyment (Agreement)                                           | 629                | 79.82  | 249                         | 65.35  | 380                     | 96.20  | <0.001               |
| <b>Environmental determinants</b>                                            |                    |        |                             |        |                         |        |                      |
| Commute distance, estimated (km) (median;IRQ)                                | 3.52               | 2.56   | 3.93                        | 2.77   | 3.08                    | 2.29   | <0.001               |
| Public bicycle stations (median;IQR)                                         |                    |        |                             |        |                         |        |                      |
| Home, count in 400m buffer                                                   | 4                  | 3      | 4                           | 3      | 4                       | 3      | <0.001               |
| Work/study, count in 400m buffer                                             | 5                  | 4      | 4                           | 4      | 5                       | 4      | <0.001               |
| Greenness, NDVI [IQR, (median;IQR)]                                          |                    |        |                             |        |                         |        |                      |
| Home, average of 400m buffer                                                 | 0.52               | 1.00   | 0.65                        | 1.06   | 0.47                    | 0.84   | <0.001               |
| Work/study, average of 400m buffer                                           | 0.35               | 1.00   | 0.38                        | 1.06   | 0.33                    | 0.89   | 0.086                |
| Commute route, average of RBA                                                | 0.69               | 1.00   | 0.72                        | 1.20   | 0.67                    | 0.87   | 0.062                |
| NO <sub>2</sub> ppb (median;IQR)                                             |                    |        |                             |        |                         |        |                      |
| Home, concentration in 400m buffer                                           | 76.70              | 25.82  | 74.60                       | 25.33  | 78.44                   | 25.76  | 0.058                |
| Work/study, concentration in 400m buffer                                     | 81.36              | 33.73  | 80.98                       | 35.97  | 81.91                   | 31.01  | 0.843                |
| Commute route, concentration in RBA                                          | 85.21              | 22.65  | 85.54                       | 22.56  | 84.89                   | 22.64  | 0.987                |
| Noise, >55dB (%) (median;IQR)                                                |                    |        |                             |        |                         |        |                      |
| Home, proportion in 400m buffer                                              | 79.41              | 14.24  | 79.05                       | 12.96  | 79.53                   | 15.14  | 0.823                |
| Work/study, proportion in 400m buffer                                        | 80.89              | 22.99  | 80.51                       | 23.54  | 81.40                   | 22.67  | 0.369                |
| Commute route, proportion in RBA                                             | 77.15              | 11.66  | 77.06                       | 10.86  | 77.34                   | 12.51  | 0.924                |
| Bikeability (median;IQR)                                                     |                    |        |                             |        |                         |        |                      |
| Home, concentration in 400m buffer                                           | 6.34               | 2.25   | 77.06                       | 10.86  | 77.34                   | 12.51  | 0.924                |
| Work/study, concentration in 400m buffer                                     | 6.92               | 2.01   | 5.94                        | 2.25   | 6.69                    | 1.87   | <0.001               |
| Commute route, concentration in RBA                                          | 6.89               | 1.55   | 6.64                        | 1.75   | 7.10                    | 1.24   | <0.001               |

PA, Physical Activity; MVPA, Moderate-to-Vigorous Physical Activity; VPA, Vigorous Physical Activity; BMI, Body Mass Index. Data are n and %, unless otherwise noted. There are missing data in: Perceived stress (13; 1.65%), Country of birth (1; 0.13%), Living with family/partner (1; 0.13%), Employed people in household (4; 0.51), Children in household (2; 0.25%), Children <3 years old in household (3; 0.38), BMI (2; 0.25%); Stress releasing (15; 1.90%), Bicycle trip enjoyment (12; 1.52%), Commute distance (20; 2.54%), Greenness (20; 2.54%), NO<sub>2</sub> (20; 2.54%). <sup>a</sup>Chi square test, instead of Age, Total PA, MVPA, VPA, and all the Environmental determinants (U Mann Whitney test).

**Table 2.** Relationship between perceived stress (median) and determinants of participants.

| Variable                                                 | Perceived stress  |         |
|----------------------------------------------------------|-------------------|---------|
|                                                          | OR (95% CI)       | p-value |
| <b>Individual determinants</b>                           |                   |         |
| Age                                                      | 1.00 (0.98, 1.01) | 0.493   |
| Total PA - min/week                                      | 1.00 (0.99, 1.00) | 0.665   |
| MVPA - min/week                                          | 1.00 (0.99, 1.00) | 0.102   |
| VPA - min/week                                           | 1.00 (0.99, 1.00) | 0.664   |
| Sex (Female)                                             | 1.98 (1.46, 2.67) | <0.001  |
| Country of birth (Yes)                                   | 1.63 (1.06, 2.51) | 0.027   |
| Working status (Student)                                 | 1.38 (0.91, 2.11) | 0.131   |
| Education level (University studies completed or Others) | 0.87 (0.64, 1.20) | 0.391   |
| Living with family/partner                               | 0.87 (0.60, 1.25) | 0.446   |
| Employed people in household (>2)                        | 0.62 (0.46, 0.84) | 0.002   |
| MEDEA index                                              |                   |         |
| 1st tertile (least deprived)                             | 1.00              |         |
| 2nd tertile                                              | 1.12 (0.78, 1.61) | 0.537   |
| 3rd tertile (most deprived)                              | 1.29 (0.90, 1.86) | 0.161   |
| Children in household (Yes)                              | 0.86 (0.63, 1.17) | 0.325   |
| Children <3 years in household (Yes)                     | 0.81 (0.47, 1.41) | 0.461   |
| Self-perceived health (Very good/Excellent)              | 0.80 (0.59, 1.09) | 0.154   |
| BMI (Overweight/Obese)                                   | 0.93 (0.67, 1.30) | 0.666   |
| Chronic disease (Yes)                                    | 1.74 (1.02, 2.95) | 0.041   |
| Stress releasing (Agreement)                             | 0.80 (0.53, 1.20) | 0.287   |
| Bicycle trip enjoyment (Agreement)                       | 0.86 (0.59, 1.25) | 0.432   |
| <b>Environmental determinants</b>                        |                   |         |
| Commute distance, estimated (km)                         | 1.02 (0.95, 1.10) | 0.511   |
| Public bicycle stations                                  |                   |         |
| Home, count in 400m buffer                               | 0.98 (0.92, 1.04) | 0.500   |
| Work/study, count in 400m buffer                         | 0.94 (0.90, 0.99) | 0.021   |
| Greenness, NDVI [IQR, (median;IQR)]                      |                   |         |
| Home, average of 400m buff                               | 0.91 (0.79, 1.05) | 0.215   |
| Work/study, average of 400m buffer                       | 1.09 (0.94, 1.27) | 0.260   |
| Commute route, average of RBA                            | 0.98 (0.84, 1.15) | 0.837   |
| NO <sub>2</sub> ppb (median;IQR)                         |                   |         |
| Home, concentration in 400m buffer                       | 1.00 (0.99, 1.01) | 0.824   |
| Work/study, concentration in 400m buffer                 | 0.99 (0.99, 1.00) | 0.110   |
| Commute route, concentration in RBA                      | 1.00 (0.99, 1.01) | 0.516   |
| Noise, >55dB (%) (median;IQR)                            |                   |         |
| Home, proportion in 400m buffer                          | 0.99 (0.98, 1.01) | 0.363   |
| Work/study, proportion in 400m buffer                    | 1.01 (0.99, 1.02) | 0.131   |
| Commute route, proportion in RBA                         | 0.99 (0.98, 1.01) | 0.410   |
| Bikeability (median;IQR)                                 |                   |         |
| Home, concentration in 400m buffer                       | 1.00 (0.91, 1.12) | 0.931   |
| Work/study, concentration in 400m buffer                 | 0.87 (0.79, 0.97) | 0.011   |
| Commute route, concentration in RBA                      | 0.86 (0.75, 0.98) | 0.021   |

PA, Physical Activity; MVPA, Moderate-to-Vigorous Physical Activity; VPA, Vigorous Physical Activity; BMI, Body Mass Index. There are missing data in: Perceived stress (13; 1.65%), Country of birth (1; 0.13%), People living with in household (1; 0.13%), Employed people in household (4; 0.51), Children in household (2; 0.25%), Children <3years old in household (3; 0.38), BMI (2; 0.25%); Stress releasing (15; 1.90%), Bicycle trip enjoyment (12; 1.52%), Commute distance (20; 2.54%), Greenness (20; 2.54%), NO<sub>2</sub> (20; 2.54%).

1  
2  
3 The GAM (Figure S1) showed that there is not statistical evidence to refuse linearity between  
4 bicycling commuting frequency (days/week) and perceived stress (score from 0 to 16).

5  
6  
7 Multivariate logistic regression analyses showed a statistically-significant inverse relationship  
8 between bicycle commuting and perceived stress. Bicycle commuters had lower odds of being  
9 stressed compared to non-bicycle commuters [OR (95%CI) = 0.61 (0.46, 0.83)]. This  
10 relationship was remained when adjusted for confounders (individual and environmental  
11 determinants) and in the majority of sensitivity analyses (Table 3, Table S4). There was a  
12 statistically-significant inverse relationship between medium and high levels of bicycle  
13 commuting and perceived stress using non-bicycle commuters [OR (95%CI) = 0.34 (0.17,  
14 0.65); OR (95%CI) = 0.50 (0.34, 0.71)] and low levels of bicycle commuting [OR (95%CI) =  
15 0.28 (0.14, 0.59); OR (95%CI) = 0.42 (0.26, 0.68)] as a reference group. This statistically-  
16 significant relationship was remained when adjusting for individual and environmental  
17 determinants and with perceived stress at P75 and P90. Regarding bicycle commuting  
18 propensity, there was a statistically-significant inverse relationship between frequent bicycle  
19 commuters and perceived stress, using unwilling non-bicycle commuters [OR (95%CI) = 0.37  
20 (0.25, 0.54)] and infrequent bicycle commuters [(95%CI) = 0.39 (0.24, 0.62)] as a reference  
21 group. The statistically-significant relationship remained after adjusting for individual and  
22 environmental determinants and with perceived stress at P75 and P90. Also, there was a  
23 statistically-significant inverse relationship between willing non-bicycle commuters and  
24 perceived stress, using unwilling non-bicycle commuters [OR (95%CI) = 0.58 (0.38, 0.89)]  
25 as a reference group. This relationship remained after adjusting for individual and  
26 environmental determinants, but not for perceived stress at P75 and P90.

27  
28  
29  
30  
31  
32  
33  
34  
35  
36  
37  
38  
39  
40  
41  
42  
43  
44  
45  
46  
47  
48  
49  
50  
51  
52  
53  
54 There was no statistically-significant interaction between sex and bicycle commuters in  
55 TAPAS Travel Survey sample.  
56  
57  
58  
59  
60

**Table 3.** Relationship between bicycle commuting and perceived stress (median) of participants.

| Variable                                  | Perceived stress          |         |                                      |         |                                      |         |                                      |         |
|-------------------------------------------|---------------------------|---------|--------------------------------------|---------|--------------------------------------|---------|--------------------------------------|---------|
|                                           | OR Unadjusted<br>(95% CI) | p-value | OR Adjusted <sup>a</sup><br>(95% CI) | p-value | OR Adjusted <sup>b</sup><br>(95% CI) | p-value | OR Adjusted <sup>c</sup><br>(95% CI) | p-value |
| <b>All sample (771)</b>                   |                           |         |                                      |         |                                      |         |                                      |         |
| Bicycle commuting status                  |                           |         |                                      |         |                                      |         |                                      |         |
| Non-bicycle commuters                     | 1.00                      |         | 1.00                                 |         | 1.00                                 |         | 1.00                                 |         |
| Bicycle commuters                         | 0.61 (0.46, 0.83)         | 0.001   | 0.62 (0.46, 0.85)                    | 0.003   | 0.64 (0.47, 0.89)                    | 0.007   | 0.70 (0.50, 0.97)                    | 0.032   |
| Bicycle commuting levels                  |                           |         |                                      |         |                                      |         |                                      |         |
| Non-bicycle commuters (0 days)            | 1.00                      |         | 1.00                                 |         | 1.00                                 |         | 1.00                                 |         |
| Low bicycle commuting (1-3 days)          | 1.18 (0.77, 1.82)         | 0.445   | 1.22 (0.78, 1.91)                    | 0.386   | 1.25 (0.79, 1.98)                    | 0.332   | 1.33 (0.84, 2.12)                    | 0.222   |
| Medium bicycle commuting (4 days)         | 0.34 (0.17, 0.65)         | 0.001   | 0.30 (0.15, 0.59)                    | <0.001  | 0.30 (0.15, 0.60)                    | 0.001   | 0.33 (0.17, 0.66)                    | 0.002   |
| High bicycle commuting (>=5 days)         | 0.50 (0.34, 0.71)         | <0.001  | 0.52 (0.36, 0.76)                    | 0.001   | 0.54 (0.37, 0.80)                    | 0.002   | 0.58 (0.39, 0.87)                    | 0.008   |
| Bicycle commuting propensity              |                           |         |                                      |         |                                      |         |                                      |         |
| Unwilling Non-bicycle commuters           | 1.00                      |         | 1.00                                 |         | 1.00                                 |         | 1.00                                 |         |
| Willing Non-bicycle commuters             | 0.58 (0.38, 0.89)         | 0.012   | 0.61 (0.39, 0.94)                    | 0.025   | 0.59 (0.38, 0.92)                    | 0.019   | 0.61 (0.39, 0.94)                    | 0.027   |
| Infrequent Bicycle commuters              | 0.96 (0.60, 1.51)         | 0.846   | 0.99 (0.61, 1.61)                    | 0.978   | 1.01 (0.62, 1.64)                    | 0.978   | 1.08 (0.66, 1.78)                    | 0.759   |
| Frequent Bicycle commuters                | 0.37 (0.25, 0.54)         | <0.001  | 0.38 (0.26, 0.56)                    | <0.001  | 0.39 (0.26, 0.58)                    | <0.001  | 0.42 (0.28, 0.64)                    | <0.001  |
| <b>Bicycle commuters sample (387)</b>     |                           |         |                                      |         |                                      |         |                                      |         |
| Bicycle commuting levels                  |                           |         |                                      |         |                                      |         |                                      |         |
| Low bicycle commuting (1-3 days)          | 1.00                      |         | 1.00                                 |         | 1.00                                 |         | 1.00                                 |         |
| Medium bicycle commuting (4 days)         | 0.28 (0.14, 0.59)         | 0.001   | 0.23 (0.11, 0.50)                    | <0.001  | 0.23 (0.10, 0.49)                    | <0.001  | 0.22 (0.10, 0.49)                    | <0.001  |
| High bicycle commuting (>=5 days)         | 0.42 (0.26, 0.68)         | <0.001  | 0.42 (0.25, 0.70)                    | 0.001   | 0.42 (0.25, 0.70)                    | 0.001   | 0.42 (0.25, 0.70)                    | 0.001   |
| Bicycle commuters propensity              |                           |         |                                      |         |                                      |         |                                      |         |
| Infrequent (1-3 days)                     | 1.00                      |         | 1.00                                 |         | 1.00                                 |         | 1.00                                 |         |
| Frequent (>=4 days)                       | 0.39 (0.24, 0.62)         | <0.001  | 0.37 (0.23, 0.61)                    | <0.001  | 0.37 (0.23, 0.60)                    | <0.001  | 0.37 (0.22, 0.60)                    | <0.001  |
| <b>Non-bicycle commuters sample (384)</b> |                           |         |                                      |         |                                      |         |                                      |         |
| Non-bicycle commuters                     |                           |         |                                      |         |                                      |         |                                      |         |
| Unwilling                                 | 1.00                      |         | 1.00                                 |         | 1.00                                 |         | 1.00                                 |         |
| Willing                                   | 0.58 (0.38, 0.89)         | 0.012   | 0.59 (0.38, 0.91)                    | 0.017   | 0.56 (0.36, 0.88)                    | 0.011   | 0.58 (0.37, 0.91)                    | 0.017   |

<sup>a</sup>Adjusted by Sex, Country of birth, Employed people in household, Chronic disease. <sup>b</sup>Adjusted by Sex, Country of birth, Employed people in household, Chronic disease, Self-perceived health, Moderate-to-Vigorous Physical Activity (MVPA). <sup>c</sup>Adjusted by Sex, Country of birth, Employed people in household, Chronic disease, Self-perceived health, MVPA, Public bicycle stations at work/study, Bikeability at work/study, Bikeability at commute route.

## DISCUSSION

### Summary of results

There was a statistically-significant inverse relationship between bicycle commuting and perceived stress. Bicyclist commuters who bicycled four or more days per week had lower odds of being stressed, and this relationship remained statistically-significant with sensitivity analyses.

### Comparison with previous studies

To our knowledge, this study is the first to assess if there is a relationship between bicycle commuting and perceived stress. A few studies have focused on the relationship between active commuting and mental health,(4–6) but the relationship is still quite unclear. One study found a positive association between active commuting (walking and cycling) and well-being(4), and another with better mental health in men.(6) Moreover, Humphreys(5) found a positive relationship between time spent actively commuting and levels of physical well-being, but not with mental well-being. The relationship between physical activity and mental health has been studied more. It has been suggested that physical activity could reduce anxiety and improve physical self-perceptions and global self-esteem,(11) and it has been associated with lower depressive symptomatology and greater emotional well-being.(34) Our results are consistent with the general idea that active commuting is associated with better mental health, but does not support physical activity as a mediator in this relationship. Our analyses did not show a statistically-significant relationship between reported levels of PA and perceived stress.



1  
2  
3 Qualitative research suggested that choice of travel mode may affect well-being.(14) The  
4 quantity of public bicycle (*Bicing*) stations and the amount of greenness has been related to  
5 bicycle commuting propensity,(19) which seems to be related with the idea of commuting on  
6 a bicycle is more likely to give people the opportunity to “enjoy” or “experience” greenness  
7 than commuting on public transport or a car. At the same time, the availability of green space  
8 close to one’s home has been shown to be related to better perceived general health.(35)  
9 Therefore, it seems that perceptual and environmental factors related to bicycle commuting  
10 could affect perceived stress, rather than the physical activity levels. This general idea is  
11 consistent with our results which show an inverse relationship between perceived stress and  
12 bicycle-friendly environments (public bicycle and bikeability levels) in work/study address  
13 area and the commute route. Also, our results showed that general attitude might have a role  
14 in this relationship, as we have seen that those willing non-bicycle commuters, compared to  
15 unwilling non-bicycle commuters, were less stressed. But this remained quite unclear as the  
16 relationship disappears in the sensitivity analyses.  
17  
18  
19  
20  
21  
22  
23  
24  
25  
26  
27  
28  
29  
30  
31  
32  
33  
34  
35  
36

### 37 **Limitations and strengths**

38  
39 Our study had some limitations. Firstly, our study used a cross-sectional design, which is not  
40 well-suited to assess the direction of causation and we cannot exclude reverse causality or  
41 residual confounding. Secondly, our measurement method may be prone to information bias.  
42 With the questionnaire data we could have misclassification error of bicycle commuting and  
43 PA because of the data being self-reported. Because of that, the potential mediation by PA  
44 could be under-estimated.(36) The TAPAS Travel Survey only measured levels of PA  
45 without differentiating between types of PA (work, travel, recreational). Furthermore, the  
46 modification of the 5-point PSS-4 Likert scale into a 4-point Likert scale could incorrectly-  
47 estimate the perceived stress.  
48  
49  
50  
51  
52  
53  
54  
55  
56  
57  
58  
59  
60

1  
2  
3  
4  
5 This study had several strengths, too. The study had high internal validity, with a good  
6  
7 representation of bicycle commuters. Related to subjects' characteristics, the TAPAS Travel  
8  
9 Survey sample is representative of Barcelona's population from the socio-demographic point  
10  
11 of view. It was compared with data from the Catalan government's Barcelona Active  
12  
13 Population Survey (Statistics and information service, Catalan government 2011) and no  
14  
15 statistically-significant differences between subjects' deprivation index and home and work  
16  
17 population density in both surveys were found.(3,19) Finally, our study in a southern  
18  
19 European city has added evidence in a different context than the current literature on these  
20  
21 issues.  
22  
23  
24  
25  
26

### 27 **Future research**

28  
29 Our findings underscored the need for future research. There is a need to obtain a clear  
30  
31 understanding of the relationship between the bicycle commuting and perceived stress in  
32  
33 longitudinal studies. It is likely that other factors could mediate the relationship between these  
34  
35 two variables, especially those related to environmental determinants and personal attitudes.  
36  
37 Further work related to determinants of bicycle commuting and perceived stress is needed.  
38  
39  
40  
41  
42  
43  
44

### 45 **CONCLUSIONS**

46  
47 We found that healthy, adult bicycle commuters had lower stress than commuters of other  
48  
49 transport modes. Also, bicycle commuters who bicycled four or more days per week had  
50  
51 lower stress than those who bicycled less than that. Environmental determinants such as the  
52  
53 number of public bicycle stations and bikeability, and also personal attitudes seem to have an  
54  
55 influence on this relationship. Our findings should be considered by decision-makers when  
56  
57  
58  
59  
60

1  
2  
3 promoting bicycle commuting as a daily routine, to reduce stress levels and improve public  
4  
5 health and well-being.  
6  
7  
8  
9  
10  
11  
12  
13  
14  
15  
16  
17  
18  
19  
20  
21  
22  
23  
24  
25  
26  
27  
28  
29  
30  
31  
32  
33  
34  
35  
36  
37  
38  
39  
40  
41  
42  
43  
44  
45  
46  
47  
48  
49  
50  
51  
52  
53  
54  
55  
56  
57  
58  
59  
60

For peer review only

## ACKNOWLEDGEMENTS

The authors are grateful to the participants of TAPAS Travel Survey and the CREAL technicians who recruited them and created geographical variables. We would like to acknowledge the ESCAPE project and its contributors for air quality and noise model data of Barcelona, as well as the Ajuntament de Barcelona, Departament de Mobilitat for street map information.

## FUNDING

This study was performed as part of the TAPAS project < <http://www.tapas-program.org/> >, funded by the Coca-Cola Foundation, the Agència de Gestió d'ajuts Universitaris i de Recerca (AGAUR) and CREAL internal funding.

## COMPETING INTERESTS

No conflicts of interest were reported by the authors of this paper.

## AUTHOR'S CONTRIBUTION

IAP drafted this version of the paper and received input from all the authors. All authors read and commented on the paper and agreed with the final version.

## DATA SHARING

Extra data is available by emailing the corresponding author (Ione Avila-Palencia: [ione.avila@isglobal.org](mailto:ione.avila@isglobal.org)).

## REFERENCES

1. Lim SS, Vos T, Flaxman AD, et al. A comparative risk assessment of burden of disease and injury attributable to 67 risk factors and risk factor clusters in 21 regions, 1990-2010: A systematic analysis for the Global Burden of Disease Study 2010. *Lancet* 2012;380(9859):2224–60.
2. Faulkner GEJ, Buliung RN, Flora PK, et al. Active school transport, physical activity levels and body weight of children and youth: A systematic review. *Prev Med* 2009;48(1):3–8.
3. Donaire-Gonzalez D, Nazelle A De, Cole-Hunter T, et al. The Added Benefit of Bicycle Commuting on the Regular Amount of Physical Activity Performed. *Am J Prev Med* 2015;49(6):842–9.
4. Martin A, Goryakin Y, Suhrcke M. Does active commuting improve psychological wellbeing? Longitudinal evidence from eighteen waves of the British Household Panel Survey. *Prev Med* 2014;69:296–303.
5. Humphreys DK, Goodman A, Ogilvie D. Associations between active commuting and physical and mental wellbeing. *Prev Med* 2013;57(2):135–9.
6. Ohta M, Mizoue T, Mishima N, et al. Effect of the physical activities in leisure time and commuting to work on mental health. *J Occup Health* 2007;49(1):46–52.
7. Andersen LB, Schnohr P, Schroll M, et al. All-Cause Mortality Associated With Physical Activity During Leisure Time, Work, Sports, and Cycling to Work. *Arch Intern Med* 2000;160(11):1621.
8. de Geus B, Van Hoof E, Aerts I, et al. Cycling to work: influence on indexes of health in untrained men and women in Flanders. Coronary heart disease and quality of life. *Scand J Med Sci Sports* 2008;18(4):498–510.

- 1  
2  
3 9. Cohen S, Kamarck T, Mermelstein R. A global measure of perceived stress. *J Health*  
4  
5 *Soc Behav* 1983;24(4):385–96.  
6
- 7 10. Katsarou AL, Triposkiadis F, Panagiotakos D. Perceived stress and vascular disease:  
8  
9 where are we now? *Angiology* 2013;64(7):529–34.  
10
- 11 11. Fox KR. The influence of physical activity on mental well-being. *Public Health Nutr*  
12  
13 1999;2(3A):411–8.  
14
- 15 12. Peluso MA, Guerra de Andrade LH. Physical activity and mental health: the  
16  
17 association between exercise and mood. *Clinics (Sao Paulo)* 2005;60(1):61–70.  
18
- 19 13. Koslowsky M. Commuting Stress: Problems of Definition and Variable Identification.  
20  
21 *Applied Psychology: An International Review* 1997;46(2):153–73.  
22
- 23 14. Guell C, Ogilvie D. Picturing commuting: photovoice and seeking well-being in  
24  
25 everyday travel. *Qual Res* 2015;15(2)201-218.  
26
- 27 15. St-Louis E, Manaugh K, van Lierop D, et al. The happy commuter: A comparison of  
28  
29 commuter satisfaction across modes. *Transportation research. Part F, Traffic psychology and*  
30  
31 *behaviour* 2014;26:160–70.  
32
- 33 16. Lajeunesse S, Rodríguez D a. Mindfulness, time affluence, and journey-based affect:  
34  
35 Exploring relationships. *Transportation research. Part F, Traffic psychology and behaviour*  
36  
37 2012;15(2):196–205.  
38
- 39 17. Anable J, Gatersleben B. All work and no play? The role of instrumental and affective  
40  
41 factors in work and leisure journeys by different travel modes. *Transportation research. Part*  
42  
43 *A, Policy and practice* 2005;39(2-3):163–81.  
44
- 45 18. Simons D, Clarys P, De Bourdeaudhuij I, et al. Factors influencing mode of transport  
46  
47 in older adolescents: A qualitative study. *BMC Public Health* 2013;13:323.  
48  
49  
50  
51  
52  
53  
54  
55  
56  
57  
58  
59  
60

- 1  
2  
3  
4  
5  
6  
7  
8  
9  
10  
11  
12  
13  
14  
15  
16  
17  
18  
19  
20  
21  
22  
23  
24  
25  
26  
27  
28  
29  
30  
31  
32  
33  
34  
35  
36  
37  
38  
39  
40  
41  
42  
43  
44  
45  
46  
47  
48  
49  
50  
51  
52  
53  
54  
55  
56  
57  
58  
59  
60
19. Cole-Hunter T, Donaire-Gonzalez D, Curto A, et al. Objective correlates and determinants of bicycle commuting propensity in an urban environment. *Transportation research. Part D Transport and environment* 2015;40(2):132–43.
  20. Olsson LE, Gärling T, Ettema D, et al. Happiness and Satisfaction with Work Commute. *Soc Indic Res* 2013;111(1):255–63.
  21. Gottholmseder G, Nowotny K, Pruckner GJ, et al. Stress perception and commuting. *Health Econ* 2009;18(5):559–76.
  22. Hansson E, Mattisson K, Björk J, et al. Relationship between commuting and health outcomes in a cross-sectional population survey in southern Sweden. *BMC Public Health* 2011;11:834.
  23. Institut d'Estudis Regionals i Metropolitans de Barcelona. La Mobilitat quotidiana a Catalunya. *Papers. Regió Metropolitana de Barcelona* 2008.
  24. Forsyth A, Krizek KJ, Agrawal AW, et al. Reliability testing of the Pedestrian and Bicycling Survey (PABS) method. *J Phys Act Health* 2012;9(5):677–88.
  25. Warttig SL, Forshaw MJ, South J, et al. New, normative, English-sample data for the Short Form Perceived Stress Scale (PSS-4). *J Health Psychol* 2013;18(12):1617–28.
  26. Craig CL, Marshall AL, Sjostrom M, et al. International physical activity questionnaire: 12-country reliability and validity. *Med Sci Sports Exerc* 2003;35(8):1381–95.
  27. Domínguez-Berjón MF, Borrell C, Cano-Serral G, et al. Constructing a deprivation index based on census data in large Spanish cities (the MEDEA project). *Gac Sanit* 2008;22(3):179–87.
  28. Beelen R, Hoek G, Vienneau D, et al. Development of NO<sub>2</sub> and NO<sub>x</sub> land use regression models for estimating air pollution exposure in 36 study areas in Europe – The ESCAPE project. *Atmospheric Environment* 2013;72(2):10–23.

- 1  
2  
3 29. Ajuntament de Barcelona. Pla d'acció per a la minoració de la contaminació acústica  
4 de la ciutat de Barcelona. 2010. <http://sima.gencat.cat/Visors/Soroll/Inici.html> (accessed 10  
5 April 2015)  
6  
7  
8  
9  
10 30. Ministere de L'Environnement. Prevision des Niveaux Sonores. 1980.  
11 <http://temis.documentation.developpement->  
12 [durable.gouv.fr/documents/temis/4859/4859\\_1980.pdf](http://temis.documentation.developpement-durable.gouv.fr/documents/temis/4859/4859_1980.pdf) (accessed 10 April 2015).  
13  
14  
15 31. World Health Organisation. Guideline for Community Noise. 2011.  
16 <http://www.who.int/docstore/peh/noise/Commnoise4.htm> (accessed 10 April 2015).  
17  
18  
19  
20 32. Ajuntament de Barcelona. Public map of private bicycle parking. 2011.  
21 <http://w3.bcn.cat/fitxers/mobilitat/bici/20100227reservesbicicletesokversio.417.pdf> (accessed  
22 10 April 2015).  
23  
24  
25  
26  
27 33. Winters M, Brauer M, Setton EM, et al. Mapping bikeability: A spatial tool to support  
28 sustainable travel. *Environ Plan B Plan Des* 2013;40(5):865–83.  
29  
30  
31 34. Galper DI, Trivedi MH, Barlow CE, Dunn AL, Kampert JB. Inverse association  
32 between physical inactivity and mental health in men and women. *Med Sci Sports Exerc*  
33 2006;38(1):173–8.  
34  
35  
36  
37 35. Maas J, Verheij RA, Groenewegen PP, et al. Green space, urbanity, and health: how  
38 strong is the relation? *J Epidemiol Community Health* 2006;60(7):587–92.  
39  
40  
41  
42 36. Baron RM, Kenny D a. The moderator-mediator variable distinction in social  
43 psychological research: conceptual, strategic, and statistical considerations. *J Pers Soc*  
44 *Psychol* 1986;51(6):1173–82.  
45  
46  
47  
48  
49  
50  
51  
52  
53  
54  
55  
56  
57  
58  
59  
60



## SUPPLEMENTARY MATERIAL

**Table S1.** PSS4 questions used in TAPAS Travel Survey

**Q218.** In the last month, how many times have you feel you can't control important things in your life?

- 0 *Never*
- 1 *Nearly never*
- 2 *Often*
- 3 *Ever*
- 997 Don't Know
- 998 Refuse to Answer

**Q219.** In the last month, how many times have you feel safety in your cleverness of take care of your own personal problems?

- 0 *Never*
- 1 *Nearly never*
- 2 *Often*
- 3 *Ever*
- 997 Don't Know
- 998 Refuse to Answer

**Q220.** In the last month, how many times have you feel that around things go in harmony you're your life?

- 0 *Never*
- 1 *Nearly never*
- 2 *Often*
- 3 *Ever*
- 997 Don't Know
- 998 Refuse to Answer

**Q221.** In the last month, how many times have you feel that difficulties are bigger than become impossible of overcome?

- 0 *Never*
- 1 *Nearly never*
- 2 *Often*
- 3 *Ever*
- 997 Don't Know
- 998 Refuse to Answer

**Table S2.** Description of the individual and environmental determinants in TAPAS sample for Bicycle commuting levels and Bicycle commuting propensity.

| Variables                                                                    | Bicycle commuting levels |        |             |        |            |        |         | Bicycle commuting propensity |        |               |        |                  |        |                |        | p-value |         |
|------------------------------------------------------------------------------|--------------------------|--------|-------------|--------|------------|--------|---------|------------------------------|--------|---------------|--------|------------------|--------|----------------|--------|---------|---------|
|                                                                              | Low (109)                |        | Medium (65) |        | High (224) |        | p-value | Unwilling (230)              |        | Willing (160) |        | Infrequent (109) |        | Frequent (289) |        |         | p-value |
|                                                                              | n                        | %      | n           | %      | n          | %      |         | n                            | %      | n             | %      | n                | %      | n              | %      |         |         |
| <b>Outcome</b>                                                               |                          |        |             |        |            |        |         |                              |        |               |        |                  |        |                |        |         |         |
| Stressed (median)(Yes)                                                       | 49                       | 45.37  | 12          | 19.05  | 57         | 26.15  | <0.001  | 107                          | 46.93  | 55            | 34.81  | 49               | 45.37  | 69             | 24.56  | <0.001  |         |
| <b>Individual determinants</b>                                               |                          |        |             |        |            |        |         |                              |        |               |        |                  |        |                |        |         |         |
| Age (median; IQR)                                                            | 36                       | 14     | 36          | 17     | 35         | 12     | 0.777   | 37                           | 16     | 36            | 16     | 36               | 14     | 35             | 12     | 0.111   |         |
| Total PA – min/week (median;IQR)                                             | 494.99                   | 435.00 | 454.99      | 330.01 | 484.99     | 440.00 | 0.567   | 364.99                       | 390.01 | 404.99        | 420.00 | 494.99           | 435.00 | 480.00         | 405.01 | <0.001  |         |
| MVPA – min/week (median;IQR)                                                 | 240.00                   | 345.01 | 294.99      | 200.00 | 300.00     | 302.50 | 0.092   | 90.00                        | 244.99 | 90.00         | 240.00 | 240.00           | 345.01 | 300.00         | 270.00 | <0.001  |         |
| VPA – min/week (median;IQR)                                                  | 120.00                   | 224.99 | 90.00       | 199.99 | 102.50     | 240.00 | 0.386   | 45.00                        | 150.00 | 0.00          | 127.50 | 120.00           | 224.99 | 90.00          | 225.00 | <0.001  |         |
| Sex (Female)                                                                 | 49                       | 44.95  | 33          | 50.77  | 94         | 41.96  | 0.446   | 151                          | 65.65  | 83            | 51.88  | 49               | 44.95  | 127            | 43.94  | <0.001  |         |
| Country of birth (non-Spanish)                                               | 19                       | 17.59  | 7           | 10.77  | 30         | 13.39  | 0.412   | 16                           | 6.96   | 25            | 15.63  | 19               | 17.59  | 37             | 12.80  | 0.014   |         |
| Working status (Student)                                                     | 17                       | 15.60  | 10          | 15.38  | 24         | 10.71  | 0.364   | 24                           | 10.43  | 29            | 18.13  | 17               | 15.60  | 34             | 11.76  | 0.112   |         |
| Education level (University studies completed or equivalent-level education) | 81                       | 74.31  | 50          | 76.92  | 173        | 77.23  | 0.836   | 161                          | 70.00  | 86            | 53.75  | 81               | 74.31  | 223            | 77.16  | <0.001  |         |
| Living with family/partner                                                   | 88                       | 80.73  | 48          | 75.00  | 172        | 76.79  | 0.622   | 192                          | 83.48  | 135           | 84.38  | 88               | 80.73  | 220            | 76.39  | 0.114   |         |
| Employed people in household (>2)                                            | 69                       | 63.30  | 35          | 55.56  | 145        | 64.73  | 0.410   | 152                          | 66.09  | 109           | 68.99  | 69               | 63.30  | 180            | 62.72  | 0.568   |         |
| MEDEA index                                                                  |                          |        |             |        |            |        | 0.627   |                              |        |               |        |                  |        |                |        | 0.660   |         |
| 1st tertile (least deprived)                                                 | 35                       | 32.11  | 23          | 35.38  | 75         | 33.48  |         | 81                           | 35.22  | 49            | 30.63  | 35               | 32.11  | 98             | 33.91  |         |         |
| 2nd tertile                                                                  | 38                       | 34.86  | 27          | 41.54  | 76         | 33.93  |         | 66                           | 28.70  | 56            | 35.00  | 38               | 34.86  | 103            | 35.64  |         |         |
| 3rd tertile (most deprived)                                                  | 36                       | 33.03  | 15          | 23.08  | 73         | 32.59  |         | 83                           | 36.09  | 55            | 34.38  | 36               | 33.03  | 88             | 30.45  |         |         |
| Children in household (Yes)                                                  | 31                       | 28.44  | 18          | 28.13  | 79         | 35.27  | 0.340   | 94                           | 40.87  | 57            | 35.85  | 31               | 28.44  | 97             | 33.68  | 0.128   |         |
| Children <3 years in household (Yes)                                         | 3                        | 2.75   | 5           | 7.94   | 20         | 8.93   | 0.114   | 20                           | 8.73   | 16            | 10.00  | 3                | 2.75   | 25             | 8.71   | 0.158   |         |
| Self-perceived health (Very good/Excellent)                                  | 43                       | 39.45  | 27          | 41.54  | 113        | 50.45  | 0.123   | 90                           | 39.13  | 50            | 31.25  | 43               | 39.45  | 140            | 48.44  | 0.004   |         |
| BMI (Overweight/Obese)                                                       | 25                       | 22.94  | 14          | 21.54  | 49         | 21.88  | 0.969   | 73                           | 31.88  | 51            | 32.08  | 25               | 22.94  | 63             | 21.8   | 0.021   |         |
| Chronic disease (Yes)                                                        | 11                       | 10.09  | 8           | 12.31  | 17         | 7.59   | 0.458   | 18                           | 7.83   | 7             | 4.38   | 11               | 10.09  | 25             | 8.65   | 0.293   |         |
| Stress releasing (Agreement)                                                 | 95                       | 87.16  | 62          | 98.41  | 199        | 90.05  | 0.047   | 163                          | 72.44  | 139           | 89.68  | 95               | 87.16  | 261            | 91.90  | <0.001  |         |
| Bicycle trip enjoyment (Agreement)                                           | 103                      | 94.50  | 65          | 100.00 | 212        | 95.93  | 0.175   | 116                          | 51.79  | 133           | 84.71  | 103              | 94.50  | 277            | 96.85  | <0.001  |         |
| <b>Environmental determinants</b>                                            |                          |        |             |        |            |        |         |                              |        |               |        |                  |        |                |        |         |         |
| Commute distance, estimated (km) (median;IQR)                                | 3.36                     | 2.81   | 3.14        | 2.14   | 2.86       | 1.99   | 0.044   | 3.89                         | 2.88   | 3.93          | 2.70   | 3.36             | 2.81   | 2.98           | 2.12   | <0.001  |         |
| Public bicycle stations (median;IQR)                                         |                          |        |             |        |            |        |         |                              |        |               |        |                  |        |                |        |         |         |
| Home, count in 400m buff                                                     | 4                        | 3      | 5           | 3      | 5          | 3      | 0.492   | 4                            | 3      | 3             | 3      | 4                | 3      | 5              | 3      | <0.001  |         |
| Work/study, count in 400m buff                                               | 5                        | 4      | 6           | 3      | 5          | 4      | 0.124   | 4                            | 4      | 5             | 5      | 5                | 4      | 5              | 3      | <0.001  |         |
| Greenness, NDVI [IQR, (median;IQR)]                                          |                          |        |             |        |            |        |         |                              |        |               |        |                  |        |                |        |         |         |
| Home, average of 400m buff                                                   | 0.50                     | 1.07   | 0.48        | 1.13   | 0.41       | 0.70   | 0.635   | 0.63                         | 1.19   | 0.76          | 1.01   | 0.50             | 1.07   | 0.44           | 0.75   | 0.002   |         |
| Work/study, average of 400m buffer                                           | 0.35                     | 1.02   | 0.27        | 0.57   | 0.35       | 0.98   | 0.136   | 0.38                         | 1.05   | 0.41          | 1.08   | 0.35             | 1.02   | 0.32           | 0.87   | 0.328   |         |
| Commute route, average of RBA                                                | 0.69                     | 1.12   | 0.54        | 0.56   | 0.68       | 0.88   | 0.322   | 0.72                         | 1.28   | 0.70          | 1.16   | 0.69             | 1.12   | 0.66           | 0.83   | 0.236   |         |
| NO <sub>2</sub> , ppb (median;IQR)                                           |                          |        |             |        |            |        |         |                              |        |               |        |                  |        |                |        |         |         |
| Home, concentration in 400m buffer                                           | 74.75                    | 29.71  | 79.15       | 24.02  | 80.11      | 24.36  | 0.186   | 76.56                        | 26.10  | 73.47         | 25.00  | 74.75            | 29.71  | 80.11          | 24.40  | 0.063   |         |
| Work/study, concentration in 400m buffer                                     | 77.60                    | 33.01  | 86.23       | 27.41  | 80.70      | 30.12  | 0.091   | 82.21                        | 34.12  | 79.23         | 38.33  | 77.60            | 33.01  | 82.61          | 30.00  | 0.727   |         |
| Commute route, concentration in RBA                                          | 82.49                    | 18.19  | 87.19       | 23.04  | 85.51      | 24.29  | 0.127   | 86.61                        | 23.03  | 82.05         | 20.99  | 82.49            | 18.19  | 85.75          | 24.56  | 0.296   |         |
| Noise, >55dB (%) (median;IQR)                                                |                          |        |             |        |            |        |         |                              |        |               |        |                  |        |                |        |         |         |
| Home, proportion in 400m buffer                                              | 79.95                    | 15.23  | 79.09       | 11.59  | 79.62      | 15.47  | 0.554   | 79.39                        | 13.89  | 78.79         | 12.69  | 79.95            | 15.23  | 79.46          | 14.84  | 0.847   |         |
| Work/study, proportion in 400m buffer                                        | 83.92                    | 23.69  | 81.36       | 21.45  | 80.83      | 22.22  | 0.468   | 80.14                        | 22.52  | 80.85         | 24.54  | 83.92            | 23.69  | 80.90          | 21.94  | 0.434   |         |
| Commute route, proportion in RBA                                             | 78.54                    | 11.93  | 73.15       | 12.48  | 77.31      | 13.02  | 0.057   | 76.78                        | 10.84  | 77.57         | 10.63  | 78.54            | 11.93  | 76.50          | 13.37  | 0.160   |         |
| Bikeability (median;IQR)                                                     |                          |        |             |        |            |        |         |                              |        |               |        |                  |        |                |        |         |         |
| Home, concentration in 400m buffer                                           | 6.63                     | 2.30   | 6.73        | 1.66   | 6.70       | 1.67   | 0.330   | 5.97                         | 2.30   | 5.92          | 2.35   | 6.63             | 2.30   | 6.72           | 1.72   | <0.001  |         |
| Work/study, concentration in 400m buffer                                     | 7.15                     | 2.08   | 7.01        | 1.20   | 7.02       | 1.86   | 0.638   | 6.64                         | 2.56   | 6.89          | 1.89   | 7.15             | 2.08   | 7.01           | 1.69   | <0.001  |         |
| Commute route, concentration in RBA                                          | 6.86                     | 1.38   | 7.23        | 0.99   | 7.15       | 1.29   | 0.236   | 6.59                         | 1.83   | 6.77          | 1.54   | 6.86             | 1.38   | 7.16           | 1.23   | <0.001  |         |

PA, Physical Activity; MVPA, Moderate-to-Vigorous Physical Activity; VPA, Vigorous Physical Activity; BMI, Body Mass Index. Data are n and %, unless otherwise noted. There are missing data in: Perceived stress (13; 1.65%), Country of birth (1; 0.13%), Living with family/partner (1; 0.13%), Employed people in household (4; 0.51%), Children in household (2; 0.25%), Children <3 years old in household (3; 0.38%), BMI (2; 0.25%); Stress releasing (15; 1.90%), Bicycle trip enjoyment (12; 1.52%), Commute distance (20; 2.54%), Greenness (20; 2.54%), NO<sub>2</sub> (20; 2.54%). \*Chi square test, instead of Age, Total PA, MVPA, VPA, and all the Environmental determinants (U Mann Whitney test).

**Table S3.** Sensitivity analyses looking the relationship between perceived stress (P75, P90) and all the covariates.

| Variable                                                                     | Perceived stress (P75) |         | Perceived stress (P90) |         |
|------------------------------------------------------------------------------|------------------------|---------|------------------------|---------|
|                                                                              | OR (95% CI)            | p-value | OR (95% CI)            | p-value |
| <b>Individual determinants</b>                                               |                        |         |                        |         |
| Age                                                                          | 1.00 (0.98, 1.02)      | 0.783   | 0.99 (0.97, 1.02)      | 0.674   |
| Total PA - min/week                                                          | 1.00 (0.99, 1.00)      | 0.057   | 1.00 (0.99, 1.00)      | 0.775   |
| MVPA - min/week                                                              | 1.00 (0.99, 1.00)      | 0.115   | 1.00 (0.99, 1.00)      | 0.673   |
| VPA - min/week                                                               | 1.00 (0.99, 1.00)      | 0.367   | 1.00 (0.99, 1.00)      | 0.728   |
| Sex (Female)                                                                 | 1.51 (1.04, 2.21)      | 0.031   | 1.78 (1.05, 3.01)      | 0.034   |
| Country of birth (non-Spanish)                                               | 1.19 (0.70, 2.05)      | 0.520   | 1.16 (0.55, 2.43)      | 0.696   |
| Working status (Student)                                                     | 1.61 (0.98, 2.64)      | 0.060   | 1.05 (0.50, 2.19)      | 0.904   |
| Education level (University studies completed or equivalent-level education) | 0.74 (0.50, 1.09)      | 0.122   | 0.78 (0.46, 1.34)      | 0.370   |
| Living with family/partner                                                   | 1.00 (0.62, 1.60)      | 0.987   | 0.94 (0.50, 1.77)      | 0.841   |
| Employed people in household (>2)                                            | 0.62 (0.42, 0.90)      | 0.012   | 0.73 (0.43, 1.22)      | 0.232   |
| MEDEA index                                                                  |                        |         |                        |         |
| 1st tertile (least deprived)                                                 | 1.00                   |         | 1.00                   |         |
| 2nd tertile                                                                  | 1.53 (0.95, 2.44)      | 0.079   | 1.95 (0.99, 3.82)      | 0.053   |
| 3rd tertile (most deprived)                                                  | 1.56 (0.97, 2.49)      | 0.065   | 1.85 (0.94, 3.66)      | 0.074   |
| Children in household (Yes)                                                  | 1.06 (0.72, 1.55)      | 0.778   | 0.91 (0.53, 1.56)      | 0.743   |
| Children <3 years in household (Yes)                                         | 0.56 (0.25, 1.27)      | 0.166   | 0.52 (0.16, 1.70)      | 0.280   |
| Self-perceived health (Very good/Excellent)                                  | 0.60 (0.40, 0.89)      | 0.010   | 0.87 (0.52, 1.47)      | 0.603   |
| BMI (Overweight/Obese)                                                       | 1.10 (0.73, 1.65)      | 0.665   | 1.03 (0.58, 1.82)      | 0.922   |
| Chronic disease (Yes)                                                        | 1.79 (0.98, 3.28)      | 0.059   | 1.77 (0.80, 3.90)      | 0.160   |
| Stress releasing (Agreement)                                                 | 0.82 (0.49, 1.35)      | 0.428   | 0.93 (0.46, 1.89)      | 0.850   |
| Bicycle trip enjoyment (Agreement)                                           | 0.68 (0.44, 1.06)      | 0.092   | 0.78 (0.42, 1.42)      | 0.412   |
| <b>Environmental determinants</b>                                            |                        |         |                        |         |
| Commute distance, estimated (km)                                             | 1.09 (0.99, 1.18)      | 0.061   | 1.03 (0.91, 1.16)      | 0.621   |
| Public bicycle stations                                                      |                        |         |                        |         |
| Home, count in 400m buffer                                                   | 0.99 (0.92, 1.06)      | 0.761   | 0.93 (0.84, 1.04)      | 0.204   |
| Work/study, count in 400m buffer                                             | 0.95 (0.89, 1.01)      | 0.088   | 0.95 (0.87, 1.04)      | 0.254   |
| Greenness, NDVI [IQR, (median:IQR)]                                          |                        |         |                        |         |
| Home, average of 400m buffer                                                 | 0.94 (0.78, 1.13)      | 0.487   | 1.04 (0.83, 1.31)      | 0.726   |
| Work/study, average of 400m buffer                                           | 1.11 (0.93, 1.34)      | 0.254   | 0.99 (0.75, 1.29)      | 0.924   |
| Commute route, average of RBA                                                | 1.05 (0.86, 1.27)      | 0.643   | 1.20 (0.95, 1.52)      | 0.119   |
| NO <sub>2</sub> ppb (median:IQR)                                             |                        |         |                        |         |
| Home, concentration in 400m buffer                                           | 1.00 (0.98, 1.01)      | 0.379   | 1.00 (0.98, 1.01)      | 0.738   |
| Work/study, concentration in 400m buffer                                     | 0.99 (0.98, 1.00)      | 0.048   | 0.99 (0.98, 1.00)      | 0.087   |
| Commute route, concentration in RBA                                          | 1.00 (0.98, 1.01)      | 0.447   | 0.99 (0.97, 1.00)      | 0.077   |
| Noise, >55dB (%) (median:IQR)                                                |                        |         |                        |         |
| Home, proportion in 400m buffer                                              | 1.01 (0.99, 1.02)      | 0.417   | 1.00 (0.98, 1.03)      | 0.814   |
| Work/study, proportion in 400m buffer                                        | 1.00 (0.99, 1.02)      | 0.539   | 1.00 (0.98, 1.02)      | 0.828   |
| Commute route, proportion in RBA                                             | 1.00 (0.98, 1.02)      | 0.854   | 1.01 (0.98, 1.04)      | 0.422   |
| Bikeability (median:IQR)                                                     |                        |         |                        |         |
| Home, concentration in 400m buffer                                           | 0.96 (0.84, 1.10)      | 0.528   | 0.92 (0.77, 1.09)      | 0.325   |
| Work/study, concentration in 400m buffer                                     | 0.90 (0.79, 1.02)      | 0.097   | 0.88 (0.74, 1.05)      | 0.162   |
| Commute route, concentration in RBA                                          | 0.85 (0.73, 1.00)      | 0.051   | 0.79 (0.64, 0.98)      | 0.030   |

PA, Physical Activity; MVPA, Moderate-to-Vigorous Physical Activity; VPA, Vigorous Physical Activity; BMI, Body Mass Index. There are missing data in: Perceived stress (13; 1.65%), Country of birth (1; 0.13%), People living with in household (1; 0.13%), Employed people in household (4; 0.51), Children in household (2; 0.25%), Children <3years old in household (3; 0.38), BMI (2; 0.25%); Stress releasing (15; 1.90%), Bicycle trip enjoyment (12; 1.52%), Commute distance (20; 2.54%), Greenness (20; 2.54%), NO<sub>2</sub> (20; 2.54%).

1  
2  
3  
4  
5  
6  
7  
8  
9  
10  
11  
12  
13  
14  
15  
16  
17  
18  
19  
20  
21  
22  
23  
24  
25  
26  
27  
28  
29  
30  
31  
32  
33  
34  
35  
36  
37  
38  
39  
40  
41  
42  
43  
44  
45  
46  
47  
48  
49  
50  
51  
52  
53  
54  
55  
56  
57  
58  
59  
60

**Figure S1.** GAM assessing linearity between bicycle commuting (days/week) and perceived stress (score from 0 to 16). p-value= 0.3304.

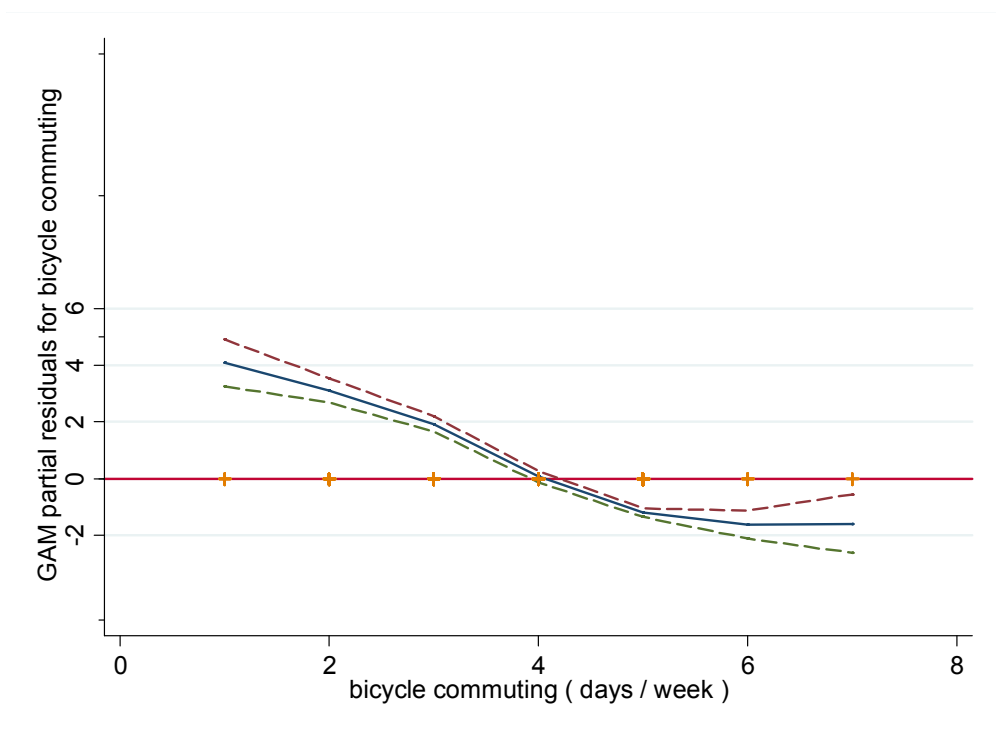

**Table S4.** Sensitivity analyses looking the relationship between bicycle commuting (Bicycle commuting status, Bicycle commuting levels, Bicycle commuting propensity) and perceived stress (P75, P90).

| Variable                                           | Perceived stress (P75) |         |                                   |         |                                   |         |                                   |         | Perceived stress (P90) |         |                                   |         |                                   |         |                                   |         |
|----------------------------------------------------|------------------------|---------|-----------------------------------|---------|-----------------------------------|---------|-----------------------------------|---------|------------------------|---------|-----------------------------------|---------|-----------------------------------|---------|-----------------------------------|---------|
|                                                    | OR Unadjusted (95% CI) | p-value | OR Adjusted <sup>a</sup> (95% CI) | p-value | OR Adjusted <sup>b</sup> (95% CI) | p-value | OR Adjusted <sup>c</sup> (95% CI) | p-value | OR Unadjusted (95% CI) | p-value | OR Adjusted <sup>d</sup> (95% CI) | p-value | OR Adjusted <sup>e</sup> (95% CI) | p-value | OR Adjusted <sup>f</sup> (95% CI) | p-value |
| <b>All sample (771)</b>                            |                        |         |                                   |         |                                   |         |                                   |         |                        |         |                                   |         |                                   |         |                                   |         |
| Bicycle commuting status                           |                        |         |                                   |         |                                   |         |                                   |         |                        |         |                                   |         |                                   |         |                                   |         |
| Non-bicycle commuters                              | 1.00                   |         | 1.00                              |         | 1.00                              |         | 1.00                              |         | 1.00                   |         | 1.00                              |         | 1.00                              |         | 1.00                              |         |
| Bicycle commuters                                  | 0.51 (0.35, 0.75)      | 0.001   | 0.50 (0.34, 0.75)                 | 0.001   | 0.54 (0.36, 0.82)                 | 0.004   | 0.58 (0.38, 0.88)                 | 0.011   | 0.51 (0.30, 0.87)      | 0.014   | 0.53 (0.31, 0.91)                 | 0.020   | 0.49 (0.28, 0.85)                 | 0.012   | 0.53 (0.30, 0.95)                 | 0.031   |
| Bicycle commuting levels                           |                        |         |                                   |         |                                   |         |                                   |         |                        |         |                                   |         |                                   |         |                                   |         |
| Non-bicycle commuters (0 days)                     | 1.00                   |         | 1.00                              |         | 1.00                              |         | 1.00                              |         | 1.00                   |         | 1.00                              |         | 1.00                              |         | 1.00                              |         |
| Low bicycle commuting (1-3 days)                   | 1.06 (0.64, 1.76)      | 0.832   | 1.04 (0.62, 1.76)                 | 0.869   | 1.10 (0.65, 1.87)                 | 0.730   | 1.14 (0.66, 1.95)                 | 0.639   | 1.23 (0.64, 2.34)      | 0.537   | 1.26 (0.65, 2.44)                 | 0.493   | 1.17 (0.60, 2.29)                 | 0.650   | 1.22 (0.61, 2.41)                 | 0.573   |
| Medium bicycle commuting (4 days)                  | 0.18 (0.05, 0.58)      | 0.004   | 0.16 (0.05, 0.52)                 | 0.002   | 0.16 (0.05, 0.54)                 | 0.003   | 0.18 (0.05, 0.59)                 | 0.005   | 0.13 (0.02, 0.99)      | 0.049   | 0.13 (0.02, 0.93)                 | 0.043   | 0.12 (0.02, 0.89)                 | 0.038   | 0.13 (0.02, 0.98)                 | 0.048   |
| High bicycle commuting (>=5 days)                  | 0.39 (0.24, 0.64)      | <0.001  | 0.39 (0.24, 0.66)                 | <0.001  | 0.43 (0.25, 0.73)                 | 0.002   | 0.46 (0.27, 0.78)                 | 0.004   | 0.31 (0.14, 0.67)      | 0.003   | 0.33 (0.15, 0.72)                 | 0.005   | 0.30 (0.13, 0.66)                 | 0.003   | 0.32 (0.14, 0.73)                 | 0.007   |
| Bicycle commuting propensity                       |                        |         |                                   |         |                                   |         |                                   |         |                        |         |                                   |         |                                   |         |                                   |         |
| Unwilling Non-bicycle commuters                    | 1.00                   |         | 1.00                              |         | 1.00                              |         | 1.00                              |         | 1.00                   |         | 1.00                              |         | 1.00                              |         | 1.00                              |         |
| Willing Non-bicycle commuters                      | 0.64 (0.39, 1.06)      | 0.085   | 0.67 (0.40, 1.13)                 | 0.132   | 0.64 (0.38, 1.08)                 | 0.095   | 0.66 (0.39, 1.10)                 | 0.113   | 0.62 (0.31, 1.24)      | 0.179   | 0.67 (0.33, 1.34)                 | 0.258   | 0.66 (0.33, 1.34)                 | 0.254   | 0.68 (0.34, 1.38)                 | 0.289   |
| Infrequent Bicycle commuters                       | 0.89 (0.52, 1.53)      | 0.682   | 0.89 (0.51, 1.56)                 | 0.691   | 0.92 (0.52, 1.62)                 | 0.773   | 0.96 (0.54, 1.70)                 | 0.881   | 1.03 (0.52, 2.05)      | 0.926   | 1.08 (0.53, 2.19)                 | 0.825   | 1.00 (0.49, 2.04)                 | 0.997   | 1.05 (0.51, 2.17)                 | 0.901   |
| Frequent Bicycle commuters                         | 0.29 (0.17, 0.48)      | <0.001  | 0.29 (0.17, 0.48)                 | <0.001  | 0.31 (0.18, 0.52)                 | <0.001  | 0.32 (0.19, 0.56)                 | <0.001  | 0.23 (0.11, 0.49)      | <0.001  | 0.24 (0.11, 0.52)                 | <0.001  | 0.22 (0.10, 0.49)                 | <0.001  | 0.24 (0.11, 0.54)                 | 0.001   |
| <b>Bicycle commuters sample (387)</b>              |                        |         |                                   |         |                                   |         |                                   |         |                        |         |                                   |         |                                   |         |                                   |         |
| Bicycle commuting levels                           |                        |         |                                   |         |                                   |         |                                   |         |                        |         |                                   |         |                                   |         |                                   |         |
| Low bicycle commuting (1-3 days)                   | 1.00                   |         | 1.00                              |         | 1.00                              |         | 1.00                              |         | 1.00                   |         | 1.00                              |         | 1.00                              |         | 1.00                              |         |
| Medium bicycle commuting (4 days)                  | 0.17 (0.05, 0.58)      | 0.005   | 0.15 (0.04, 0.51)                 | 0.003   | 0.15 (0.04, 0.51)                 | 0.003   | 0.14 (0.04, 0.51)                 | 0.003   | 0.11 (0.01, 0.85)      | 0.034   | 0.10 (0.01, 0.78)                 | 0.028   | 0.10 (0.01, 0.78)                 | 0.028   | 0.09 (0.01, 0.75)                 | 0.025   |
| High bicycle commuting (>=5 days)                  | 0.37 (0.20, 0.69)      | 0.002   | 0.37 (0.20, 0.70)                 | 0.002   | 0.37 (0.19, 0.70)                 | 0.002   | 0.37 (0.19, 0.70)                 | 0.002   | 0.25 (0.10, 0.62)      | 0.003   | 0.25 (0.10, 0.62)                 | 0.003   | 0.24 (0.09, 0.60)                 | 0.002   | 0.24 (0.09, 0.60)                 | 0.003   |
| Bicycle commuters propensity                       |                        |         |                                   |         |                                   |         |                                   |         |                        |         |                                   |         |                                   |         |                                   |         |
| Infrequent (1-3 days)                              | 1.00                   |         | 1.00                              |         | 1.00                              |         | 1.00                              |         | 1.00                   |         | 1.00                              |         | 1.00                              |         | 1.00                              |         |
| Frequent (>=4 days)                                | 0.32 (0.18, 0.59)      | <0.001  | 0.31 (0.17, 0.58)                 | <0.001  | 0.31 (0.17, 0.58)                 | <0.001  | 0.31 (0.17, 0.58)                 | <0.001  | 0.22 (0.09, 0.53)      | 0.001   | 0.21 (0.09, 0.52)                 | 0.001   | 0.21 (0.08, 0.50)                 | 0.001   | 0.20 (0.08, 0.50)                 | 0.001   |
| <b>Exposure Non-bicycle commuters sample (384)</b> |                        |         |                                   |         |                                   |         |                                   |         |                        |         |                                   |         |                                   |         |                                   |         |
| Non-bicycle commuters                              |                        |         |                                   |         |                                   |         |                                   |         |                        |         |                                   |         |                                   |         |                                   |         |
| Unwilling                                          | 1.00                   |         | 1.00                              |         | 1.00                              |         | 1.00                              |         | 1.00                   |         | 1.00                              |         | 1.00                              |         | 1.00                              |         |
| Willing                                            | 0.64 (0.39, 1.06)      | 0.085   | 0.65 (0.38, 1.09)                 | 0.104   | 0.59 (0.35, 1.00)                 | 0.051   | 0.60 (0.35, 1.03)                 | 0.062   | 0.62 (0.31, 1.24)      | 0.179   | 0.64 (0.32, 1.31)                 | 0.225   | 0.64 (0.31, 1.31)                 | 0.223   | 0.67 (0.33, 1.38)                 | 0.275   |

<sup>a</sup>Adjusted by Sex, Country of birth, Employed people in household, Chronic disease. <sup>b</sup>Adjusted by Age, Sex, Country of birth, Employed people in household, Chronic disease, Self-perceived health, Moderate-to-Vigorous Physical Activity (MVPA). <sup>c</sup>Adjusted by Age, Sex, Country of birth, Employed people in household, Chronic disease, Self-perceived health, MVPA, Public bicycle stations at work/study, Bikeability at work/study, Bikeability at commute route. Data were collected from June 2011 through to May 2012 in Barcelona, Spain.

## STROBE Statement—checklist of items that should be included in reports of observational studies

|                          | Item No | Recommendation                                                                                                                                                                                                                                                                                                                                                                                                                                                         | Reported in page           |
|--------------------------|---------|------------------------------------------------------------------------------------------------------------------------------------------------------------------------------------------------------------------------------------------------------------------------------------------------------------------------------------------------------------------------------------------------------------------------------------------------------------------------|----------------------------|
| Title and abstract       | 1       | (a) Indicate the study's design with a commonly used term in the title or the abstract                                                                                                                                                                                                                                                                                                                                                                                 | Page 2                     |
|                          |         | (b) Provide in the abstract an informative and balanced summary of what was done and what was found                                                                                                                                                                                                                                                                                                                                                                    | Page 2                     |
| <b>Introduction</b>      |         |                                                                                                                                                                                                                                                                                                                                                                                                                                                                        |                            |
| Background/rationale     | 2       | Explain the scientific background and rationale for the investigation being reported                                                                                                                                                                                                                                                                                                                                                                                   | Pages 3, 4                 |
| Objectives               | 3       | State specific objectives, including any prespecified hypotheses                                                                                                                                                                                                                                                                                                                                                                                                       | Page 4                     |
| <b>Methods</b>           |         |                                                                                                                                                                                                                                                                                                                                                                                                                                                                        |                            |
| Study design             | 4       | Present key elements of study design early in the paper                                                                                                                                                                                                                                                                                                                                                                                                                | Page 4                     |
| Setting                  | 5       | Describe the setting, locations, and relevant dates, including periods of recruitment, exposure, follow-up, and data collection                                                                                                                                                                                                                                                                                                                                        | Pages 4, 5                 |
| Participants             | 6       | (a) <i>Cohort study</i> —Give the eligibility criteria, and the sources and methods of selection of participants. Describe methods of follow-up<br><i>Case-control study</i> —Give the eligibility criteria, and the sources and methods of case ascertainment and control selection. Give the rationale for the choice of cases and controls<br><i>Cross-sectional study</i> —Give the eligibility criteria, and the sources and methods of selection of participants | Pages 4, 5                 |
|                          |         | (b) <i>Cohort study</i> —For matched studies, give matching criteria and number of exposed and unexposed<br><i>Case-control study</i> —For matched studies, give matching criteria and the number of controls per case                                                                                                                                                                                                                                                 | -                          |
| Variables                | 7       | Clearly define all outcomes, exposures, predictors, potential confounders, and effect modifiers. Give diagnostic criteria, if applicable                                                                                                                                                                                                                                                                                                                               | Pages 5, 6, 7, 8           |
| Data sources/measurement | 8*      | For each variable of interest, give sources of data and details of methods of assessment (measurement). Describe comparability of assessment methods if there is more than one group                                                                                                                                                                                                                                                                                   | Pages 5, 6, 7, 8           |
| Bias                     | 9       | Describe any efforts to address potential sources of bias                                                                                                                                                                                                                                                                                                                                                                                                              | Pages 4, 5                 |
| Study size               | 10      | Explain how the study size was arrived at                                                                                                                                                                                                                                                                                                                                                                                                                              | Page 8, in previous papers |
| Quantitative variables   | 11      | Explain how quantitative variables were handled in the analyses. If applicable, describe which groupings were chosen and why                                                                                                                                                                                                                                                                                                                                           | Pages 5, 6, 7, 8           |
| Statistical methods      | 12      | (a) Describe all statistical methods, including those used to control for confounding                                                                                                                                                                                                                                                                                                                                                                                  | Page 8                     |
|                          |         | (b) Describe any methods used to examine subgroups and interactions                                                                                                                                                                                                                                                                                                                                                                                                    | Page 8                     |
|                          |         | (c) Explain how missing data were addressed                                                                                                                                                                                                                                                                                                                                                                                                                            | Page 8                     |
|                          |         | (d) <i>Cohort study</i> —If applicable, explain how loss to follow-up was addressed<br><i>Case-control study</i> —If applicable, explain how matching of cases and controls was addressed<br><i>Cross-sectional study</i> —If applicable, describe analytical methods taking                                                                                                                                                                                           | Page 8                     |

account of sampling strategy

---

(e) Describe any sensitivity analyses

Page 8

Continued on next page

For peer review only

1  
2  
3  
4  
5  
6  
7  
8  
9  
10  
11  
12  
13  
14  
15  
16  
17  
18  
19  
20  
21  
22  
23  
24  
25  
26  
27  
28  
29  
30  
31  
32  
33  
34  
35  
36  
37  
38  
39  
40  
41  
42  
43  
44  
45  
46  
47  
48  
49  
50  
51  
52  
53  
54  
55  
56  
57  
58  
59  
60

| <b>Results</b>           |     |                                                                                                                                                                                                              | <b>Reported in page</b>         |
|--------------------------|-----|--------------------------------------------------------------------------------------------------------------------------------------------------------------------------------------------------------------|---------------------------------|
| Participants             | 13* | (a) Report numbers of individuals at each stage of study—eg numbers potentially eligible, examined for eligibility, confirmed eligible, included in the study, completing follow-up, and analysed            | In previous papers              |
|                          |     | (b) Give reasons for non-participation at each stage                                                                                                                                                         | In previous papers              |
|                          |     | (c) Consider use of a flow diagram                                                                                                                                                                           | In previous papers              |
| Descriptive data         | 14* | (a) Give characteristics of study participants (eg demographic, clinical, social) and information on exposures and potential confounders                                                                     | Pages 8, 9, 10                  |
|                          |     | (b) Indicate number of participants with missing data for each variable of interest                                                                                                                          | Pages 8, 9, 10                  |
|                          |     | (c) <i>Cohort study</i> —Summarise follow-up time (eg, average and total amount)                                                                                                                             | -                               |
| Outcome data             | 15* | <i>Cohort study</i> —Report numbers of outcome events or summary measures over time                                                                                                                          | -                               |
|                          |     | <i>Case-control study</i> —Report numbers in each exposure category, or summary measures of exposure                                                                                                         | -                               |
|                          |     | <i>Cross-sectional study</i> —Report numbers of outcome events or summary measures                                                                                                                           | Pages 9,11                      |
| Main results             | 16  | (a) Give unadjusted estimates and, if applicable, confounder-adjusted estimates and their precision (eg, 95% confidence interval). Make clear which confounders were adjusted for and why they were included | Pages 12, 13                    |
|                          |     | (b) Report category boundaries when continuous variables were categorized                                                                                                                                    | Pages 6, 7                      |
|                          |     | (c) If relevant, consider translating estimates of relative risk into absolute risk for a meaningful time period                                                                                             | -                               |
| Other analyses           | 17  | Report other analyses done—eg analyses of subgroups and interactions, and sensitivity analyses                                                                                                               | Page 12, supplementary material |
| <b>Discussion</b>        |     |                                                                                                                                                                                                              |                                 |
| Key results              | 18  | Summarise key results with reference to study objectives                                                                                                                                                     | Page 14                         |
| Limitations              | 19  | Discuss limitations of the study, taking into account sources of potential bias or imprecision. Discuss both direction and magnitude of any potential bias                                                   | Pages 15, 16                    |
| Interpretation           | 20  | Give a cautious overall interpretation of results considering objectives, limitations, multiplicity of analyses, results from similar studies, and other relevant evidence                                   | Pages 14, 15, 16, 17            |
| Generalisability         | 21  | Discuss the generalisability (external validity) of the study results                                                                                                                                        | Pages 15, 16                    |
| <b>Other information</b> |     |                                                                                                                                                                                                              |                                 |
| Funding                  | 22  | Give the source of funding and the role of the funders for the present study and, if applicable, for the original study on which the present article is based                                                | Page 19                         |

\*Give information separately for cases and controls in case-control studies and, if applicable, for exposed and unexposed groups in cohort and cross-sectional studies.

**Note:** An Explanation and Elaboration article discusses each checklist item and gives methodological background and published examples of transparent reporting. The STROBE checklist is best used in conjunction with this article (freely available on the Web sites of PLoS Medicine at <http://www.plosmedicine.org/>, Annals of Internal Medicine at



1  
2 <http://www.annals.org/>, and Epidemiology at <http://www.epidem.com/>). Information on the STROBE Initiative is  
3 available at [www.strobe-statement.org](http://www.strobe-statement.org).  
4  
5  
6  
7  
8  
9  
10  
11  
12  
13  
14  
15  
16  
17  
18  
19  
20  
21  
22  
23  
24  
25  
26  
27  
28  
29  
30  
31  
32  
33  
34  
35  
36  
37  
38  
39  
40  
41  
42  
43  
44  
45  
46  
47  
48  
49  
50  
51  
52  
53  
54  
55  
56  
57  
58  
59  
60

For peer review only

# BMJ Open

## THE RELATIONSHIP BETWEEN BICYCLE COMMUTING AND PERCEIVED STRESS: A CROSS-SECTIONAL STUDY

|                                 |                                                                                                                                                                                                                                                                                                                                                                                                                                                                                                                                                                                                                                                                                                |
|---------------------------------|------------------------------------------------------------------------------------------------------------------------------------------------------------------------------------------------------------------------------------------------------------------------------------------------------------------------------------------------------------------------------------------------------------------------------------------------------------------------------------------------------------------------------------------------------------------------------------------------------------------------------------------------------------------------------------------------|
| Journal:                        | <i>BMJ Open</i>                                                                                                                                                                                                                                                                                                                                                                                                                                                                                                                                                                                                                                                                                |
| Manuscript ID                   | bmjopen-2016-013542.R1                                                                                                                                                                                                                                                                                                                                                                                                                                                                                                                                                                                                                                                                         |
| Article Type:                   | Research                                                                                                                                                                                                                                                                                                                                                                                                                                                                                                                                                                                                                                                                                       |
| Date Submitted by the Author:   | 20-Dec-2016                                                                                                                                                                                                                                                                                                                                                                                                                                                                                                                                                                                                                                                                                    |
| Complete List of Authors:       | Avila-Palencia, Ione; ISGlobal, Centre for Research in Environmental Epidemiology (CREAL), de Nazelle, Audrey; Centre for Environmental Policy, Imperial College of London<br>Cole-Hunter, Tom; Colorado State University, Department of Environmental and Radiological Health Sciences<br>Donaire-Gonzalez, David; 1ISGlobal, Centre for Research in Environmental Epidemiology (CREAL)<br>Jerrett, Michael; University of California Los Angeles, Department of Environmental Health Sciences<br>Rodriguez, Daniel; University of California Berkeley, Department of City and Regional Planning<br>Nieuwenhuijsen, Mark; ISGlobal, Centre for Research in Environmental Epidemiology (CREAL) |
| <b>Primary Subject Heading</b>: | Epidemiology                                                                                                                                                                                                                                                                                                                                                                                                                                                                                                                                                                                                                                                                                   |
| Secondary Subject Heading:      | Mental health, Public health                                                                                                                                                                                                                                                                                                                                                                                                                                                                                                                                                                                                                                                                   |
| Keywords:                       | EPIDEMIOLOGY, MENTAL HEALTH, PUBLIC HEALTH                                                                                                                                                                                                                                                                                                                                                                                                                                                                                                                                                                                                                                                     |
|                                 |                                                                                                                                                                                                                                                                                                                                                                                                                                                                                                                                                                                                                                                                                                |

SCHOLARONE™  
Manuscripts

1  
2  
3  
4 1 **THE RELATIONSHIP BETWEEN BICYCLE COMMUTING**  
5  
6 2 **AND PERCEIVED STRESS: A CROSS-SECTIONAL STUDY**  
7

8  
9 3 Ione Avila-Palencia, MPH<sup>1,2,3</sup>; Audrey de Nazelle, PhD<sup>4</sup>; Tom Cole-Hunter, PhD<sup>5</sup>; David  
10  
11 4 Donaire-Gonzalez, PhD<sup>1,3,6</sup>; Michael Jerrett, PhD<sup>7</sup>; Daniel A. Rodriguez, PhD<sup>8</sup>; Mark J  
12  
13 5 Nieuwenhuijsen, PhD<sup>1,2,3</sup>  
14

15 6 **Author's affiliations:**

16  
17 7 <sup>1</sup>ISGlobal, Centre for Research in Environmental Epidemiology (CREAL). Barcelona, Spain.  
18

19  
20 8 <sup>2</sup>Universitat Pompeu Fabra (UPF). Barcelona, Spain.  
21

22 9 <sup>3</sup>CIBER Epidemiología y Salud Pública (CIBERESP), Barcelona, Spain.  
23

24 10 <sup>4</sup>Centre for Environmental Policy, Imperial College of London, London, United Kingdom.  
25

26 11 <sup>5</sup>Department of Environmental and Radiological Health Sciences, Colorado State University,  
27  
28 12 Fort Collins, CO, USA  
29

30 13 <sup>6</sup>Physical Activity and Sports Sciences Department, Fundació Blanquerna, Ramon Llull  
31  
32 14 University. Barcelona, Spain.  
33

34 15 <sup>7</sup>Department of Environmental Health Sciences, University of California, Los Angeles,  
35  
36 16 California, United States of America.  
37

38  
39 17 <sup>8</sup>Department of City and Regional Planning, University of California, Berkeley, California,  
40  
41 18 United States of America.  
42

43 19 **Corresponding author information:**

44  
45 20 Ione Avila-Palencia, ISGlobal, Centre for Research in Environmental Epidemiology  
46  
47 21 (CREAL), Doctor Aiguader, 88, 08003 Barcelona, Spain. Telephone (+34) 93 2147337; Fax  
48  
49 22 (+34) 93 2147302; E-mail: [ione.avila@isglobal.org](mailto:ione.avila@isglobal.org)  
50  
51

52 23 **Keywords:** Environmental epidemiology, Physical activity, Stress, Urbanisation, Self-rated  
53  
54 24 health  
55

56 25 **Word count of main text:** 3562  
57  
58  
59  
60

## 1 ABSTRACT

2 **Introduction:** Active commuting –walking and bicycling for travel to and/or from work or  
3 educational addresses– may facilitate daily, routine physical activity. Several studies have  
4 investigated the relationship between active commuting and commuting stress, but there are  
5 no studies examining the relationship between bicycle commuting and perceived stress, or  
6 studies that account for environmental determinants of bicycling commuting and stress. The  
7 current study evaluated the relationship between bicycle use for commuting among working  
8 or studying adults in a dense urban setting and perceived stress.

9 **Methods:** A cross-sectional study was performed with 788 adults who regularly travelled to  
10 work or study locations in Barcelona, Spain, excluding those who only commuted on foot.  
11 Participants responded to a comprehensive telephone survey concerning their travel behaviour  
12 from June 2011 through to May 2012. Participants were categorised as either bicycle  
13 commuters or non-bicycle commuters, and based on the Perceived Stress Scale (PSS-4), as  
14 stressed or non-stressed. Multivariate Poisson regression with robust variance models of stress  
15 status based on bicycling exposure, adjusting for potential confounders, were estimated.

16 **Results:** Bicycle commuters had significantly lower risk of being stressed [RR (95%CI) =  
17 0.73 (0.60, 0.89)]. Bicycle commuters who bicycled four or more days per week had lower  
18 risk of being stressed than those who bicycled less than four days. This relationship remained  
19 statistically significant after adjusting for individual and environmental confounders, and  
20 when using a different cut-off of perceived stress.

21 **Conclusions:** Stress reduction may be an important consequence of routine bicycle use and  
22 should be considered by decision makers as another potential benefit of its promotion.

1  
2  
3  
4  
5  
6  
7  
8  
9  
10  
11  
12  
13  
14  
15  
16  
17  
18  
19  
20  
21  
22  
23  
24  
25  
26  
27  
28  
29  
30  
31  
32  
33  
34  
35  
36  
37  
38  
39  
40  
41  
42  
43  
44  
45  
46  
47  
48  
49  
50  
51  
52  
53  
54  
55  
56  
57  
58  
59  
60

## 1 **STRENGTHS AND LIMITATIONS OF THIS STUDY**

- 2 • The study had high internal validity, with a good representation of bicycle commuters.
- 3 • The study was conducted in Barcelona (a southern European city), adding evidence in  
4 a different context than the current literature on these issues.
- 5 • The TAPAS Travel Survey sample is representative of Barcelona's population, taking  
6 into account home neighbourhood deprivation and home and work population density.
- 7 • The study used a cross-sectional design, which is not well-suited to assess the  
8 direction of causation.
- 9 • Using questionnaire data we could have misclassification error (information bias) of  
10 bicycle commuting and physical activity because of the data being self-reported.

## 1 INTRODUCTION

2 Walking and bicycling for transport is increasingly being promoted due to its potential for  
3 increasing physical activity (PA) levels in the general population(1–3). Active commuting –  
4 walking and bicycling for travel to and/or from work or educational addresses – has been  
5 associated with multiple health benefits from reductions to cardiovascular risk (4,5), lowering  
6 of body weight(2,5), improvement of fitness, reduced risk of diabetes (3), to higher levels of  
7 physical and mental well-being(6,7). Specifically, bicycle commuting has been inversely  
8 associated with all-cause mortality among both men and women in all age groups(8) and it  
9 seems to be likely to improve the health-related quality of life in previously untrained healthy  
10 adults(9). Active commuting has been shown to have other societal benefits such as helping  
11 reduce air pollution, greenhouse gas emissions, and noise, and improving social  
12 interaction(10).

13  
14 Perceived stress is a global and comprehensive stress construct that refers to the interaction  
15 between the individual and the environment in the presence of a stressor(11). The perception  
16 of an event as stressful can result in a range of physiological, behavioural, and psychological  
17 changes, and can lead to cardiovascular disease, increased negative affect, lowered self-  
18 esteem, and lowered feelings of control. Hence, it is possible that mental health outcomes  
19 such as anxiety disorders and depression can be manifestations of chronic, perceived  
20 stress(12). Furthermore, others have suggested gender differences in stress-related variables.  
21 Women seem to be more physiologically reactive to social rejection challenges(13), are more  
22 likely to have daily stress, and be more impacted by life events(14).

23  
24 Some literature recognises commuting as a potential source of stress(15); however, active  
25 commuters have been shown to have higher levels of satisfaction, lower stress, higher

1 relaxation and a heightened sense of freedom compared to car drivers.(16–18). Recent  
2 qualitative research has suggested that commuting can be perceived as a relaxing or  
3 transitional time between home and work life, which can also be about enjoying pleasant  
4 landscape, nature and wildlife(19). Emerging literature has highlighted the relevance of  
5 positive natural and built environment to increase bicycle commuting and to improve mental  
6 health outcomes. Bicycle lane connectivity, bikeability, separation of bicycling from other  
7 traffic, high population density, short trip distance, proximity of a cycle path, green space and  
8 also walkability have been suggested as determinants of bicycling(20–24). Green space has  
9 also been associated with better self-perceived general health and better mental health(25,26).

10  
11 Several studies have examined the relationship between active commuting and commuting  
12 stress (stress directly related with the act of commuting)(17,18,27,28), but none of them have  
13 studied the relationship between adult bicycle commuters and perceived stress, nor taking into  
14 account environmental determinants. Moreover, most studies of active commuting benefits on  
15 mental health have been conducted in North America or Northwest Europe, where the urban  
16 design tends to be less dense than many parts of the world(6,7,17,28–30). Consequently, a  
17 need exists to understand the relationship between bicycle commuting and perceived stress,  
18 particularly in dense urban environments.

19  
20 The current study aimed to evaluate the relationship between bicycle commuting among the  
21 working or studying adult population and perceived stress in a dense urban setting.

22

## 1 MATERIALS AND METHODS

### 2 Study population

3 This cross-sectional study was based on participants from the Transportation, Air Pollution  
4 and Physical Activities (TAPAS) Travel Survey. TAPAS is a relatively large study aimed at  
5 investigating the risks and benefits of active commuting. Participant recruitment was  
6 conducted by trained interviewers on the streets of Barcelona city between June 2011 and  
7 May 2012. To ensure adequate geographic coverage, a total of 40 random points (four random  
8 points within each of the ten city districts across Barcelona) were sampled. Adult bicycle  
9 commuters and non-bicycle commuters were asked in the street to answer a few screening  
10 questions, and those who fulfilled the inclusion criteria (being older than 18 years of age;  
11 living in Barcelona city since 2006 or earlier; working or going to school in Barcelona city;  
12 being healthy enough to ride a bicycle for 20 minutes; having a commute distance greater than  
13 a 10-minute walk; and using at least one mode of transport other than walking to commute)  
14 were invited to respond to a telephone survey. Bicycle commuters were oversampled to  
15 ensure enough bicycle commuters in the study. Those solely commuting on foot were  
16 excluded as the main interest was in the contrast between motorized modes (private and  
17 public transportation) and the bicycle. Of the 18469 participants approached across the forty  
18 sampling random points, 6701 agreed to answer screening questions. Of these, 1508 met the  
19 inclusion criteria, and 871 participants completed the survey. After survey responses were  
20 checked by the research team, 815 still fulfilled the inclusion criteria and 789 had geocodable  
21 home address. After excluding one PA outlier (total of all walking, moderate and vigorous  
22 time variables >960 minutes/day), 788 participants remained. Further details on the  
23 recruitment is given elsewhere(31).



1  
2  
3 1 The study protocol was approved by the Clinical Research Ethical Committee of the Parc de  
4  
5 2 Salut Mar (CEIC-Parc de Salut Mar), and written informed consent was obtained from all  
6  
7 3 participants.  
8  
9 4

## 11 5 **Bicycle commuting**

13  
14 6 The TAPAS Travel Survey assessed the regular use of transport modes(32) and the bicycle  
15  
16 7 use(33). Participants who indicated using a bicycle (private or from public bicycle sharing  
17  
18 8 system) to go to work or school at least once the week prior to survey administration were  
19  
20 9 classified as “bicycle commuters”. Participants who did not commute by bicycle in the week  
21  
22 10 prior to survey administration were classified as “non-bicycle commuters”.  
23  
24 11

26  
27 12 As part of the sensitivity analyses, commuting behaviour was further classified according to  
28  
29 13 bicycle commuting levels and bicycle commuting propensity(24). Bicycle commuting levels  
30  
31 14 classification was based on the days of bicycle commuting in the week prior to survey  
32  
33 15 administration: “low” being three days or fewer, “medium” for four days, and “high” for five  
34  
35 16 or more days. This measure could be interpreted as a proxy of bicycle commuting frequency.

37  
38 17 Bicycle commuting propensity classification took into account both frequency and  
39  
40 18 willingness to commute by bicycle:the “bicycle commuters” were further classified as  
41  
42 19 “frequent” (four or more days) or “infrequent” (three or less days), and the “non-bicycle  
43  
44 20 commuters” were classified as “willing” or “unwilling”. The “willing” group were those  
45  
46 21 “non-bicycle commuters” who indicated bicycling as “never or nearly never” their general  
47  
48 22 transport mode, but who also indicated that they would consider bicycle commuting in  
49  
50 23 Barcelona (they answered positively to “considering costs, travelling time, comfort and  
51  
52 24 safety, how ready would you be to use the bicycle/Bicing (public bicycle-sharing system) for  
53  
54 25 your trip to work or education centre?”). The “unwilling” group were those “non-bicycle

1 commuters” who indicated “never or nearly never” bicycling for travel and indicated that they  
2 would not consider bicycle commuting in Barcelona by answering negatively to the above  
3 question. More details of the bicycle commuting propensity classification are given  
4 elsewhere(24). This measure was included in the analysis to assess the effect of being willing  
5 to commute by bicycle in perceived stress.

### 7 **Perceived stress**

8 The last four questions of the TAPAS Travel Survey were the short version of Perceived  
9 Stress Scale (PSS-4)(11), which is a well-validated psychological instrument to measure the  
10 degree to which situations in one’s life over the past month are appraised as stressful. The  
11 instrument contains four statements, which measure how unpredictable, uncontrollable, and  
12 overloaded respondents feel that their lives are (Table S1). The higher the score on the PSS-4  
13 (from 0 to 16), the greater the respondent perceives that their demands exceed their ability to  
14 cope. There are no cut-off scores. Instead, an individual’s score is compared to a normative  
15 value(34). In the TAPAS Travel Survey the 5-point Likert scale was modified to a 4-point  
16 Likert scale, removing the midpoint option for consistency with other questions in the survey,  
17 as all other questions used a 4-point Likert scale. The sample did not have high levels of  
18 perceived stress (Table S2); therefore, for an easier interpretation participants with a PSS-4  
19 score higher than 3 (median of the total sample) were classified as “stressed”, and those equal  
20 or lower than 3 were classified as “non-stressed”. The sensitivity of our results to this choice  
21 was examined further in sensitivity analyses by classifying the respondents with PSS-4 scores  
22 in the 75<sup>th</sup> percentile (P75) and above (a score higher than 4) and in the 90<sup>th</sup> percentile (P90)  
23 and above (a score of 6 and above) as stressed and all others as non-stressed.

## 1 **Other explanatory measures**

2 Individual determinants of bicycle commuting and perceived stress such as physical activity  
3 levels(35), socio-demographic variables, and work or school addresses were also derived from  
4 the TAPAS Travel Survey to be used as potential confounders. In addition, the MEDEA  
5 Index (Mortalidad en áreas pequeñas Españolas y Desigualdades socioEconómicas y  
6 Ambientales, in Spanish; Environmental and socioEconomic Inequalities in Mortality in small  
7 Spanish areas, translated to English) was used as an area deprivation indicator assigned to  
8 each participants' address. MEDEA measures deprivation at the census tract level based on  
9 five domains including percentage of manual workers, temporary workers, total population  
10 with low education, young population with low education, and unemployment(36).

11  
12 Environmental determinants of bicycle commuting and perceived stress within a 400m buffer  
13 surrounding home and work/study addresses, and a Route-By-Area (RBA) surrounding  
14 predicted commute routes, were calculated to be used as potential confounders too. The  
15 number of public bicycle stations within a 400m buffer surrounding home and work/study  
16 addresses was calculated based on information from the Ajuntament de Barcelona -  
17 Informació de Base i Cartografia (IBC) (Barcelona City Council – Basic information and  
18 mapping). Greenness was calculated as a mean in Normalized Difference Vegetation Index  
19 (NDVI) via satellite imagery (LANDSAT 4 and 5, NASA). Mean NO<sub>2</sub> levels were estimated  
20 using a land-use regression model developed for a previous project(37). Noise was calculated  
21 as the proportion of street length above a 55 dB(A) threshold(38). A bikeability index was  
22 calculated taking into account five factors shown to influence bicycling: bicycle facility  
23 availability, bicycle facility quality, street connectivity, topography, and land use(39).  
24 Commute distance did not use buffers and it was calculated in km following the street

1 network of the shortest route from home address to work address. Further details of the  
2 environmental determinants calculation are given elsewhere(24).

#### 4 **Statistical analyses**

5 A Generalized Additive Model (GAM) was used to test linearity between perceived stress and  
6 total physical activity (Total PA), moderate-to-vigorous physical activity (MVPA), vigorous  
7 physical activity (VPA), and age(40). As there was no statistical evidence to reject linearity  
8 between perceived stress and Total PA (p-value = 0.3816), MVPA (p-value = 0.5025), VPA  
9 (p-value = 0.1630), and age (p-value = 0.2282), these variables were included as continuous  
10 variables in the model assuming a linear relationship. Multivariate Poisson regression with  
11 robust variance models were used to assess the relationship between bicycle commuting and  
12 perceived stress. Possible mediation by different levels of PA between bicycle commuting and  
13 perceived stress, and any interaction between gender and bicycle commuting were also tested  
14 with Poisson regression with robust variance models. All regression models were conducted  
15 with a complete case analysis and included individual and environmental potential  
16 confounders that showed a p-value <0.05 in the bivariate analysis as well as those found to be  
17 statistically significant within previous literature. The first descriptive statistical analyses were  
18 conducted in Stata version SE 12 (StataCorp LP, Texas USA), while Poisson regression with  
19 robust variance models were conducted in Stata version SE 14 (StataCorp LP, Texas USA).

## 20 **RESULTS**

21 The included sample had an equal distribution of genders and the median age (P25-P75) was  
22 36 (29-43) years (Table 1). The majority of participants were non-stressed (had a stress score  
23 equal or lower than 3), Spanish, possessing university studies completed or equivalent-level  
24 education, living with their family or partner, living with at least 2 employed people and not

1  
2  
3 1 with children (64.34%). Among those living with children, 8.12% had children younger than  
4  
5 2 3 years of age. The sample had positive self-perception of health (with only <1% of  
6  
7 3 participants self-perceiving bad or very bad health), healthy weight according to BMI  
8  
9 4 (71.12%), and generally no chronic disease (92.26%). Bicycle commuters were statistically  
10  
11 5 significant more likely to be non-stressed; younger (35 years); men; have higher levels of PA;  
12  
13 6 possess a university or equivalent-level education; live alone and/or with flat mates with 0-1  
14  
15 7 employed people; have no children; and have better self-perception of health, and healthy  
16  
17 8 weight, but more chronic diseases than non-bicycle commuters. The majority of participants  
18  
19 9 considered that they could release stress when riding a bicycle and that they enjoyed their trip  
20  
21 10 more if they used a bicycle. Bicycle commuters had shorter commutes compared to non-  
22  
23 11 bicycle commuters, and we observed a gradient between commute distance and bicycle  
24  
25 12 commuting levels with shorter distances for those who cycled more frequently. This tendency  
26  
27 13 was also followed by bicycle commuting propensity, with decreasing commute distance from  
28  
29 14 unwilling to bicycle to frequent bicyclists (Table S3). Bicycle commuters also had more  
30  
31 15 public bicycle stations around the home and work/study addresses, lower average greenness  
32  
33 16 around the home address, and higher levels of bikeability at home, work/study address, and  
34  
35 17 on the commute route compared to non-bicycle commuters (Table 1). These environmental  
36  
37 18 determinants stayed statistically significant for bicycle commuting propensity, but not  
38  
39 19 between bicycle commuting levels (Table S3).  
40  
41  
42  
43  
44  
45

46 21 Women, non-Spanish, those living with 0-1 employed people, and those having a chronic  
47  
48 22 disease were more likely to be stressed (Table 2). Participants who had more public bicycle  
49  
50 23 stations around their work/study area and higher levels of bikeability in the work/study  
51  
52 24 address area and on the commute route were less likely to be stressed. There was no  
53  
54 25 statistically significant relationship between commute distance, greenness, NO<sub>2</sub> and noise, and  
55  
56  
57  
58  
59  
60

1  
2  
3 1 perceived stress. The possible mediation of PA was not further explored as there was no  
4  
5 2 statistically significant relationship between levels of PA (Total PA, MVPA and VPA) and  
6  
7 3 perceived stress [RR: 1.00; 95% CI: (0.99, 1.00)] for the three different classifications of  
8  
9 4 perceived stress (P50, P75, P90) (Table 2, Table S4).  
10  
11  
12  
13  
14  
15  
16  
17  
18  
19  
20  
21  
22  
23  
24  
25  
26  
27  
28  
29  
30  
31  
32  
33  
34  
35  
36  
37  
38  
39  
40  
41  
42  
43  
44  
45  
46  
47  
48  
49  
50  
51  
52  
53  
54  
55  
56  
57  
58  
59  
60

**Table 1.** Descriptive analyses of perceived stress and determinants of participants and according to bicycle commuting status.

| Variables                                                                    | Total sample (788) |               | Bicycle commuting status    |               |                         |               | p-value <sup>a</sup> |
|------------------------------------------------------------------------------|--------------------|---------------|-----------------------------|---------------|-------------------------|---------------|----------------------|
|                                                                              | n                  | %             | Non-bicycle commuters (390) |               | Bicycle commuters (398) |               |                      |
|                                                                              |                    |               | n                           | %             | n                       | %             |                      |
| <b>Outcome</b>                                                               |                    |               |                             |               |                         |               |                      |
| Stressed (median) (Yes)                                                      | 280                | 35.53         | 162                         | 41.97         | 118                     | 30.33         | 0.001                |
| <b>Individual determinants</b>                                               |                    |               |                             |               |                         |               |                      |
| Age (median; P25-P75)                                                        | 36                 | 29-43         | 37                          | 30-45         | 35                      | 29-41         | 0.025                |
| Total PA – min/week (median; P25-P75)                                        | 424.99             | 269.99-700.00 | 374.99                      | 209.99-624.99 | 484.98                  | 329.99-734.99 | <0.001               |
| MVPA – min/week (median; P25-P75)                                            | 197.49             | 72.50-374.99  | 90.00                       | 0-40          | 299.99                  | 159.99-464.99 | <0.001               |
| VPA – min/week (median; P25-P75)                                             | 72.50              | 0-180.00      | 35.00                       | 0-134.99      | 105.00                  | 0-225.00      | <0.001               |
| Sex (Woman)                                                                  | 410                | 52.03         | 234                         | 60.00         | 176                     | 44.22         | <0.001               |
| Country of birth (non-Spanish)                                               | 97                 | 12.31         | 41                          | 10.51         | 56                      | 14.11         | 0.125                |
| Working status (Student)                                                     | 104                | 13.20         | 347                         | 87.19         | 51                      | 12.81         | 0.748                |
| Education level (University studies completed or equivalent-level education) | 551                | 69.92         | 247                         | 63.33         | 304                     | 76.38         | <0.001               |
| Living with family/partner                                                   | 635                | 80.58         | 327                         | 83.85         | 308                     | 77.58         | 0.026                |
| Employed people in household (2-5)                                           | 510                | 64.72         | 261                         | 67.27         | 249                     | 62.88         | 0.198                |
| MEDEA index                                                                  |                    |               |                             |               |                         |               | 0.355                |
| 1st tertile (least deprived)                                                 | 263                | 33.38         | 130                         | 33.33         | 133                     | 33.42         |                      |
| 2nd tertile                                                                  | 263                | 33.38         | 122                         | 31.28         | 141                     | 35.43         |                      |
| 3rd tertile (most deprived)                                                  | 262                | 33.25         | 138                         | 35.38         | 124                     | 31.16         |                      |
| Children in household (Yes)                                                  | 279                | 35.41         | 151                         | 38.82         | 128                     | 32.24         | 0.054                |
| Children <3 years in household (Yes)                                         | 64                 | 8.12          | 36                          | 9.25          | 28                      | 7.07          | 0.264                |
| Self-perceived health (Very good/Excellent)                                  | 323                | 40.99         | 140                         | 35.90         | 183                     | 45.98         | 0.004                |
| BMI (Overweight/Obese)                                                       | 212                | 26.9          | 124                         | 31.96         | 88                      | 22.11         | 0.002                |
| Chronic disease (Yes)                                                        | 61                 | 7.74          | 25                          | 6.41          | 36                      | 9.05          | 0.166                |
| Stress releasing (Agreement)                                                 | 658                | 83.50         | 302                         | 79.47         | 356                     | 90.59         | <0.001               |
| Bicycle trip enjoyment (Agreement)                                           | 629                | 79.82         | 249                         | 65.35         | 380                     | 96.20         | <0.001               |
| <b>Environmental determinants</b>                                            |                    |               |                             |               |                         |               |                      |
| Commute distance, estimated (km) (mean;SD)                                   | 3.85               | 2.05          | 4.38                        | 2.25          | 3.35                    | 1.70          | <0.001               |
| <b>Public bicycle stations (mean;SD)</b>                                     |                    |               |                             |               |                         |               |                      |
| Home, count in 400m buffer                                                   | 4.25               | 2.54          | 3.75                        | 2.51          | 4.75                    | 2.47          | <0.001               |
| Work/study, count in 400m buffer                                             | 4.92               | 3.11          | 4.50                        | 3.13          | 5.33                    | 3.04          | <0.001               |
| <b>Greenness, NDVI [IQR, (mean;SD)]</b>                                      |                    |               |                             |               |                         |               |                      |
| Home, average of 400m buffer                                                 | 0.79               | 1.07          | 0.91                        | 1.08          | 0.68                    | 1.06          | <0.001               |
| Work/study, average of 400m buffer                                           | 0.62               | 0.96          | 0.70                        | 1.07          | 0.55                    | 0.83          | 0.086                |
| Commute route, average of RBA                                                | 0.97               | 0.96          | 1.07                        | 1.06          | 0.87                    | 0.85          | 0.062                |
| <b>NO<sub>2</sub> ppb (mean;SD)</b>                                          |                    |               |                             |               |                         |               |                      |
| Home, concentration in 400m buffer                                           | 76.20              | 17.52         | 75.16                       | 17.12         | 77.21                   | 17.87         | 0.058                |
| Work/study, concentration in 400m buffer                                     | 78.43              | 22.51         | 78.56                       | 23.92         | 78.31                   | 21.10         | 0.843                |
| Commute route, concentration in RBA                                          | 84.40              | 16.97         | 84.24                       | 16.82         | 84.55                   | 17.13         | 0.987                |
| <b>Noise, &gt;55dB (%) (mean;SD)</b>                                         |                    |               |                             |               |                         |               |                      |
| Home, proportion in 400m buffer                                              | 78.63              | 11.40         | 78.77                       | 10.99         | 78.50                   | 11.79         | 0.823                |
| Work/study, proportion in 400m buffer                                        | 79.59              | 14.66         | 79.09                       | 14.86         | 80.07                   | 14.46         | 0.369                |
| Commute route, proportion in RBA                                             | 77.40              | 9.04          | 77.51                       | 8.58          | 77.30                   | 9.48          | 0.924                |
| <b>Bikeability (mean;SD)</b>                                                 |                    |               |                             |               |                         |               |                      |
| Home, concentration in 400m buffer                                           | 6.20               | 1.41          | 5.93                        | 1.45          | 6.46                    | 1.31          | <0.001               |
| Work/study, concentration in 400m buffer                                     | 6.56               | 1.39          | 6.31                        | 1.54          | 6.79                    | 1.17          | <0.001               |
| Commute route, concentration in RBA                                          | 6.70               | 1.12          | 6.45                        | 1.20          | 6.94                    | 0.98          | <0.001               |

PA, Physical Activity; MVPA, Moderate-to-Vigorous Physical Activity; VPA, Vigorous Physical Activity; BMI, Body Mass Index; NDVI, Normalized Difference Vegetation Index; RBA, Route-By-Area. Data are n and %, unless otherwise noted. There are missing data in: Perceived stress (13; 1.65%), Total PA (5; 0.63%), Country of birth (1; 0.13%), Living with family/partner (1; 0.13%), Employed people in household (4; 0.51), Children in household (2; 0.25%), Children <3years old in household (3; 0.38), BMI (2; 0.25%); Stress releasing (15; 1.90%), Bicycle trip enjoyment (12; 1.52%), Commute distance (20; 2.54%), Greenness (20; 2.54%), NO<sub>2</sub>(20; 2.54%). <sup>a</sup>Chi square test, except for Age, Total PA, MVPA, VPA, and all the Environmental determinants (U Mann Whitney test).

32423

**Table 2.** Bivariate analyses showing the relationships between perceived stress (median) and determinants of participants.

| Variable                                                 | Perceived stress  |         |
|----------------------------------------------------------|-------------------|---------|
|                                                          | RR (95% CI)       | p-value |
| <b>Individual determinants</b>                           |                   |         |
| Age                                                      | 1.00 (0.99, 1.01) | 0.502   |
| Total PA - min/week                                      | 1.00 (0.99, 1.00) | 0.669   |
| MVPA - min/week                                          | 1.00 (0.99, 1.00) | 0.114   |
| VPA - min/week                                           | 1.00 (0.99, 1.00) | 0.658   |
| Gender (Woman)                                           | 1.55 (1.27, 1.89) | <0.001  |
| Country of birth (Spain)                                 | 1.34 (1.05, 1.70) | 0.017   |
| Working status (Student)                                 | 1.22 (0.95, 1.56) | 0.115   |
| Education level (University studies completed or Others) | 0.92 (0.75, 1.12) | 0.387   |
| Living with family/partner                               | 0.91 (0.73, 1.15) | 0.439   |
| Employed people in household (2-5)                       | 0.74 (0.62, 0.90) | 0.002   |
| MEDEA index                                              |                   |         |
| 1st tertile (least deprived)                             | 1.00              |         |
| 2nd tertile                                              | 1.08 (0.85, 1.37) | 0.537   |
| 3rd tertile (most deprived)                              | 1.18 (0.94, 1.48) | 0.162   |
| Children in household (Yes)                              | 0.90 (0.74, 1.11) | 0.330   |
| Children <3 years in household (Yes)                     | 0.87 (0.60, 1.27) | 0.475   |
| Self-perceived health (Very good/Excellent)              | 0.87 (0.71, 1.06) | 0.157   |
| BMI (Overweight/Obese)                                   | 0.95 (0.77, 1.18) | 0.669   |
| Chronic disease (Yes)                                    | 1.38 (1.04, 1.83) | 0.024   |
| Stress releasing (Agreement)                             | 0.87 (0.68, 1.11) | 0.273   |
| Bicycle trip enjoyment (Agreement)                       | 0.91 (0.72, 1.14) | 0.425   |
| <b>Environmental determinants</b>                        |                   |         |
| Commute distance, estimated (km)                         | 1.02 (0.97, 1.06) | 0.508   |
| Public bicycle stations                                  |                   |         |
| Home, count in 400m buffer                               | 0.99 (0.95, 1.02) | 0.503   |
| Work/study, count in 400m buffer                         | 0.96 (0.93, 0.99) | 0.024   |
| Greenness, NDVI                                          |                   |         |
| Home, average of 400m buffer                             | 0.94 (0.85, 1.05) | 0.258   |
| Work/study, average of 400m buffer                       | 1.06 (0.96, 1.16) | 0.241   |
| Commute route, average of RBA                            | 0.99 (0.89, 1.09) | 0.838   |
| NO <sub>2</sub> ppb                                      |                   |         |
| Home, concentration in 400m buffer                       | 1.00 (0.99, 1.01) | 0.827   |
| Work/study, concentration in 400m buffer                 | 1.00 (0.99, 1.00) | 0.100   |
| Commute route, concentration in RBA                      | 1.00 (0.99, 1.00) | 0.518   |
| Noise, >55dB                                             |                   |         |
| Home, proportion in 400m buffer                          | 1.00 (0.98, 1.00) | 0.363   |
| Work/study, proportion in 400m buffer                    | 1.01 (0.99, 1.01) | 0.125   |
| Commute route, proportion in RBA                         | 1.00 (0.98, 1.01) | 0.405   |
| Bikeability                                              |                   |         |
| Home, concentration in 400m buffer                       | 1.00 (0.94, 1.07) | 0.931   |
| Work/study, concentration in 400m buffer                 | 0.92 (0.86, 0.98) | 0.009   |
| Commute route, concentration in RBA                      | 0.91 (0.84, 0.98) | 0.018   |

PA, Physical Activity; MVPA, Moderate-to-Vigorous Physical Activity; VPA, Vigorous Physical Activity; BMI, Body Mass Index; NDVI, Normalized Difference Vegetation Index; RBA, Route-By-Area. Complete case analysis excluding missing data of the variables of final models (Table 3; n=771). The variables that still present missing data and are not included in the final models are: Total PA (5; 0.63%), People living with in household (1; 0.13%), Children in household (2; 0.25%), Children <3years old in household (3; 0.38%), BMI (2; 0.25%); Stress releasing (15; 1.90%), Bicycle trip enjoyment (12; 1.52%), Commute distance (20; 2.54%), Greenness (20; 2.54%), NO<sub>2</sub> (20; 2.54%).



1 Multivariate Poisson regression with robust variance analyses showed a statistically  
2 significant inverse relationship between bicycle commuting and perceived stress. Bicycle  
3 commuters had a lower risk of being stressed compared to non-bicycle commuters [RR  
4 (95%CI) = 0.73 (0.60, 0.89)]. This relationship remained after adjusting for confounders  
5 (individual and environmental) and when using P75 and P90 perceived stress cut-offs (Table  
6 3, Table S5). There was a statistically significant inverse relationship between medium and  
7 high levels of bicycle commuting and perceived stress using non-bicycle commuters as a  
8 reference group [RR (95%CI) = 0.46 (0.28, 0.78); RR (95%CI) = 0.63 (0.49, 0.81)] and also  
9 when using low levels of bicycle commuting [RR (95%CI) = 0.42 (0.24, 0.73); RR (95%CI) =  
10 0.57 (0.42, 0.77)] as a reference group. This statistically significant relationship remained in  
11 the majority of sensitivity analyses Regarding bicycle commuting propensity, there was a  
12 statistically significant inverse relationship between frequent bicycle commuters and  
13 perceived stress, using unwilling non-bicycle commuters [RR (95%CI) = 0.53 (0.41, 0.67)]  
14 and infrequent bicycle commuters [RR (95%CI) = 0.54 (0.40, 0.72)] as respective reference  
15 groups. The statistically significant relationship remained after adjusting for individual and  
16 environmental confounders and when using perceived stress P75 and P90 as cut-offs . Also,  
17 there was a statistically significant inverse relationship between willing non-bicycle  
18 commuters and perceived stress, using unwilling non-bicycle commuters [RR (95%CI) = 0.72  
19 (0.56, 0.94)] as a reference group in the bicycle commuting propensity variable and also  
20 looking only in the non-bicycle commuting group. This relationship remained after adjusting  
21 for individual and environmental confounders, but not when using perceived stress at the P75  
22 and P90 cut-offs.

23  
24 In the fully adjusted models, we found no statistically significant interactions between gender  
25 and bicycle commuters (p-value= 0.165) between gender and bicycle commuting levels (p-

- 1 value=0.226, p-value=0.266, p-value=0.431), or between gender and bicycle commuting
- 2 propensity (p-value=0.982, p-value=0.197, p-value=0.277) (results not shown).

For peer review only

1 **Table 3.** Multivariate models showing the relationships between bicycle commuting and perceived stress (median) of participants.

| Variable                                  | Perceived stress          |         |                                      |         |                                      |         |                                      |         |
|-------------------------------------------|---------------------------|---------|--------------------------------------|---------|--------------------------------------|---------|--------------------------------------|---------|
|                                           | RR Unadjusted<br>(95% CI) | p-value | RR Adjusted <sup>a</sup><br>(95% CI) | p-value | RR Adjusted <sup>b</sup><br>(95% CI) | p-value | RR Adjusted <sup>c</sup><br>(95% CI) | p-value |
| <b>All sample (771)</b>                   |                           |         |                                      |         |                                      |         |                                      |         |
| Bicycle commuting status                  |                           |         |                                      |         |                                      |         |                                      |         |
| Non-bicycle commuters                     | 1.00                      |         | 1.00                                 |         | 1.00                                 |         | 1.00                                 |         |
| Bicycle commuters                         | 0.73 (0.60, 0.89)         | 0.001   | 0.75 (0.62, 0.91)                    | 0.003   | 0.77 (0.63, 0.94)                    | 0.009   | 0.80 (0.66, 0.99)                    | 0.036   |
| Bicycle commuting levels                  |                           |         |                                      |         |                                      |         |                                      |         |
| Non-bicycle commuters (0 days)            | 1.00                      |         | 1.00                                 |         | 1.00                                 |         | 1.00                                 |         |
| Low bicycle commuting (1-3 days)          | 1.10 (0.87, 1.39)         | 0.436   | 1.11 (0.88, 1.40)                    | 0.369   | 1.13 (0.89, 1.44)                    | 0.297   | 1.17 (0.92, 1.48)                    | 0.205   |
| Medium bicycle commuting (4 days)         | 0.46 (0.28, 0.78)         | 0.004   | 0.45 (0.27, 0.74)                    | 0.002   | 0.45 (0.27, 0.75)                    | 0.002   | 0.48 (0.29, 0.80)                    | 0.005   |
| High bicycle commuting (>=5 days)         | 0.63 (0.49, 0.81)         | <0.001  | 0.66 (0.51, 0.85)                    | 0.001   | 0.68 (0.52, 0.88)                    | 0.003   | 0.71 (0.54, 0.92)                    | 0.010   |
| Bicycle commuting propensity              |                           |         |                                      |         |                                      |         |                                      |         |
| Unwilling Non-bicycle commuters           | 1.00                      |         | 1.00                                 |         | 1.00                                 |         | 1.00                                 |         |
| Willing Non-bicycle commuters             | 0.72 (0.56, 0.94)         | 0.014   | 0.75 (0.58, 0.97)                    | 0.029   | 0.74 (0.57, 0.96)                    | 0.022   | 0.75 (0.58, 0.97)                    | 0.031   |
| Infrequent Bicycle commuters              | 0.98 (0.76, 1.25)         | 0.847   | 1.00 (0.78, 1.27)                    | 0.980   | 1.01 (0.79, 1.30)                    | 0.949   | 1.04 (0.81, 1.34)                    | 0.739   |
| Frequent Bicycle commuters                | 0.53 (0.41, 0.67)         | <0.001  | 0.55 (0.43, 0.70)                    | <0.001  | 0.56 (0.43, 0.72)                    | <0.001  | 0.58 (0.45, 0.76)                    | <0.001  |
| <b>Bicycle commuters sample (387)</b>     |                           |         |                                      |         |                                      |         |                                      |         |
| Bicycle commuting levels                  |                           |         |                                      |         |                                      |         |                                      |         |
| Low bicycle commuting (1-3 days)          | 1.00                      |         | 1.00                                 |         | 1.00                                 |         | 1.00                                 |         |
| Medium bicycle commuting (4 days)         | 0.42 (0.14, 0.59)         | 0.002   | 0.39 (0.23, 0.67)                    | 0.001   | 0.39 (0.23, 0.65)                    | <0.001  | 0.38 (0.23, 0.65)                    | <0.001  |
| High bicycle commuting (>=5 days)         | 0.57 (0.26, 0.68)         | <0.001  | 0.59 (0.44, 0.80)                    | 0.001   | 0.59 (0.44, 0.80)                    | 0.001   | 0.59 (0.44, 0.80)                    | 0.001   |
| Bicycle commuters propensity              |                           |         |                                      |         |                                      |         |                                      |         |
| Infrequent (1-3 days)                     | 1.00                      |         | 1.00                                 |         | 1.00                                 |         | 1.00                                 |         |
| Frequent (>=4 days)                       | 0.54 (0.24, 0.62)         | <0.001  | 0.55 (0.41, 0.73)                    | <0.001  | 0.54 (0.41, 0.72)                    | <0.001  | 0.54 (0.41, 0.72)                    | <0.001  |
| <b>Non-bicycle commuters sample (384)</b> |                           |         |                                      |         |                                      |         |                                      |         |
| Non-bicycle commuters                     |                           |         |                                      |         |                                      |         |                                      |         |
| Unwilling                                 | 1.00                      |         | 1.00                                 |         | 1.00                                 |         | 1.00                                 |         |
| Willing                                   | 0.72 (0.38, 0.89)         | 0.015   | 0.73 (0.57, 0.95)                    | 0.020   | 0.72 (0.56, 0.93)                    | 0.013   | 0.74 (0.57, 0.95)                    | 0.020   |

<sup>a</sup>Adjusted by Gender, Country of birth, Employed people in household, Chronic disease. <sup>b</sup>Adjusted by Age, Gender, Country of birth, Employed people in household, Chronic disease, Self-perceived health, Moderate-to-Vigorous Physical Activity (MVPA). <sup>c</sup>Adjusted by Age, Gender, Country of birth, Employed people in household, Chronic disease, Self-perceived health, MVPA, Public bicycle stations at work/study, Bikeability at work/study, Bikeability at commute route.

## 1 **DISCUSSION**

### 2 **Summary of results**

3 We evaluated relationships between bicycle commuting and perceived stress while adjusting  
4 for several confounders in a representative sample of adults in Barcelona, Spain. We found  
5 statistically significant inverse relationships between several measures of bicycle commuting  
6 and perceived stress. Bicycle commuters who bicycled four or more days per week had lower  
7 risk of being stressed compared to those who cycled less or did not bicycle on their commute.  
8 This relationship remained statistically significant in all sensitivity analyses and after  
9 controlling for individual and environmental confounders.

### 11 **Comparison with previous studies**

12 To our knowledge, this study is the first to assess whether a relationship exists between  
13 bicycle commuting and perceived stress. A few studies have focused on the relationship  
14 between active commuting and mental health(6,7,29), but the relationship is still unclear. One  
15 study found a positive association between active commuting and well-being(6), and another  
16 with better mental health in men(29). Moreover, Humphreys(7) found a positive relationship  
17 between time spent actively commuting and levels of physical well-being, but not with mental  
18 well-being. The relationship between physical activity and mental health has been studied  
19 more. It has been suggested that physical activity could reduce stress and anxiety on a daily  
20 basis while improving self-perception and mood(41–43), and it has been associated with  
21 lower depressive symptomatology and greater emotional well-being(44). These findings  
22 suggest that the physical activity gained during bicycle commuting(31) may act as a mediator  
23 in the relationship between bicycle commuting and perceived stress. Our results are consistent  
24 with the general idea that active commuting is associated with better mental health, but in our

1 case physical activity did not act as a mediator in this relationship. Our sample was  
2 composed of young, healthy, and active participants with low levels of perceived stress,  
3 which might have led to an underestimation of the relationship between PA and perceived  
4 stress.

5  
6 Qualitative research suggested that choice of travel mode may affect well-being(19). The  
7 quantity of public bicycle (*Bicing*) stations and the amount of greenness has been related to  
8 bicycle commuting propensity(24), which could imply that commuting by bicycle provides  
9 people with more opportunities to “enjoy” or “experience” greenness than commuting on  
10 public transport or a car. At the same time, the availability of green space close to one’s home  
11 has been shown to be related to better self-perceived general health and better mental  
12 health(25,26,45). Therefore, it seems that perceptual and environmental factors related to  
13 bicycle commuting could affect perceived stress, in the way that more pleasant an  
14 environment to bicycle commute is, better perceived stress results we will get. This general  
15 idea is consistent with our results which show an inverse relationship between perceived  
16 stress and bicycle-friendly environments (public bicycle stations and bikeability levels) in  
17 work/study address area and the commute route. Importantly, the relationship between  
18 bicycling and stress was unchanged after controlling for the environmental confounders. Our  
19 results also showed that general attitude might have a role in this relationship, as we have seen  
20 that those willing non-bicycle commuters, compared to unwilling non-bicycle commuters,  
21 were less stressed. But this remained quite unclear as the relationship becomes statistically no  
22 significant in the sensitivity analyses.

1

## 2 **Limitations and strengths**

3 Our study had some limitations. Firstly, our study used a cross-sectional design, which is not  
4 well-suited to assess the direction of causation, and we cannot exclude reverse causality or  
5 residual confounding. It has been suggested that stressed people can engage in unhealthy  
6 behaviours, such as poor dietary practices or a lack of physical activity(46). This reasoning  
7 could be applied to a behaviour like bicycle commuting, where those individuals who are  
8 more stressed would bicycle less. Secondly, our measurement method may be prone to  
9 information bias. With the questionnaire data we could have random misclassification error of  
10 bicycle commuting and PA because of the data being self-reported. Therefore, the risk  
11 estimate and also the potential mediation by PA could be under-estimated(47). The TAPAS  
12 Travel Survey only measured levels of PA without differentiating between types of PA (work,  
13 travel, recreational). Furthermore, the modification of the 5-point PSS-4 Likert scale into a 4-  
14 point Likert scale could incorrectly-estimate the perceived stress.

15

16 This study had several strengths, too. The study had high internal validity, with a good  
17 representation of bicycle commuters. Related to participants' characteristics, the TAPAS  
18 Travel Survey sample is representative of Barcelona's population from the socio-demographic  
19 point of view. It was compared with data from the Catalan government's Barcelona Active  
20 Population Survey (Statistics and information service, Catalan government 2011) and no  
21 statistically significant differences between participants' deprivation index and home and  
22 work population density in both surveys were found(24,31). Finally, our study in a southern  
23 European city has added evidence in a different context than the current literature on these  
24 issues.

25

## 1 **Future research**

2 Our findings underscored the need for future research. There is a need to obtain a clear  
3 understanding of the relationship between the bicycle commuting and perceived stress in  
4 longitudinal studies. The role of PA in this relationship seems unclear, and it is likely that  
5 other factors could affect the relationship between these two variables, especially those related  
6 to environmental determinants and personal attitudes. Further work related to determinants  
7 and mediators of bicycle commuting and perceived stress is needed.

## 8 **CONCLUSIONS**

9 We found that healthy, adult bicycle commuters had lower risk of being stressed than  
10 commuters of other transport modes. Also, bicycle commuters who bicycled four or more  
11 days per week had lower risk of being stressed than those who bicycled less than that.  
12 Environmental determinants such as the number of public bicycle stations and bikeability, and  
13 also personal attitudes seem to have an influence on this relationship. Further research is  
14 needed in order to disentangle the relationship between bicycle commuting and perceived  
15 stress, and its determinants (individual and environmental) and potential mediators. Our  
16 findings suggest that decision-makers may promote bicycle commuting as a daily routine, to  
17 reduce stress levels and improve public health and well-being.

## 1 **ACKNOWLEDGEMENTS**

2 The authors are grateful to the participants of TAPAS Travel Survey and the CREAL  
3 technicians who recruited them and created geographical variables. We would like to  
4 acknowledge the ESCAPE project and its contributors for air quality and noise model data of  
5 Barcelona, as well as the Ajuntament de Barcelona, Departament de Mobilitat for street map  
6 information.

## 7 **FUNDING**

8 This study was performed as part of the TAPAS project < <http://www.tapas-program.org/> >,  
9 funded by the Coca-Cola Foundation, the Agència de Gestió d'ajuts Universitaris i de Recerca  
10 (AGAUR) and CREAL internal funding. Coca-Cola Foundation provided funding, but had no  
11 role whatsoever in the design of the study or data collection, or interpretation of the results.

## 12 **COMPETING INTERESTS**

13 No conflicts of interest were reported by the authors of this paper.

## 14 **AUTHOR'S CONTRIBUTION**

15 MJN and AdN obtained the funding and designed the study. IAP conducted the analyses and  
16 drafted this version of the paper and received input from all the authors. All authors read and  
17 commented on the paper and agreed with the final version.

## 18 **DATA SHARING**

19 Extra data is available by emailing the corresponding author (Ione Avila-Palencia:  
20 [ione.avila@isglobal.org](mailto:ione.avila@isglobal.org)).

21



## 1 REFERENCES

- 2 1. Faulkner GEJ, Buliung RN, Flora PK, Fusco C. Active school transport, physical  
3 activity levels and body weight of children and youth: A systematic review. *Prev Med.*  
4 Elsevier Inc.; 2009;48(1):3–8.
- 5 2. Wanner M, Götschi T, Martin-Diener E, Kahlmeier S, Martin BW. Active Transport,  
6 Physical Activity, and Body Weight in Adults: A Systematic Review. *Am J Prev Med.*  
7 2012;42(5):493–502.
- 8 3. Saunders LE, Green JM, Petticrew MP, Steinbach R, Roberts H, Morris J, et al. What  
9 Are the Health Benefits of Active Travel? A Systematic Review of Trials and Cohort Studies.  
10 Ruiz JR, editor. *PLoS One.* 2013;8(8):e69912.
- 11 4. Hamer M, Chida Y. Active commuting and cardiovascular risk: A meta-analytic  
12 review. *Prev Med.* 2008;46(1):9–13.
- 13 5. Xu H, Wen LM, Rissel C. The relationships between active transport to work or  
14 school and cardiovascular health or body weight: a systematic review. *Asia Pac J Public*  
15 *Health.* 2013 Jul [cited 2016 Nov 7];25(4):298–315.
- 16 6. Martin A, Goryakin Y, Suhrcke M. Does active commuting improve psychological  
17 wellbeing? Longitudinal evidence from eighteen waves of the British Household Panel  
18 Survey. *Prev Med.* 2014;69:296–303.
- 19 7. Humphreys DK, Goodman A, Ogilvie D. Associations between active commuting and  
20 physical and mental wellbeing. *Prev Med.* 2013;57(2):135–9.
- 21 8. Andersen LB, Schnohr P, Schroll M, Hein HO. All-Cause Mortality Associated With  
22 Physical Activity During Leisure Time, Work, Sports, and Cycling to Work. *Arch Intern*  
23 *Med.* 2000;160(11):1621.

- 1  
2  
3 1 9. de Geus B, Van Hoof E, Aerts I, Meeusen R. Cycling to work: influence on indexes of  
4  
5 2 health in untrained men and women in Flanders. *Coronary heart disease and quality of life.*  
6  
7 3 *Scand J Med Sci Sports.* 2008;18(4):498–510.  
8  
9 4 10. de Nazelle A, Nieuwenhuijsen MJ, Antó JM, Brauer M, Briggs D, Braun-Fahrlander  
10  
11 5 C, et al. Improving health through policies that promote active travel: A review of evidence to  
12  
13 6 support integrated health impact assessment. *Environ Int.* 2011;37(4):766–77.  
14  
15 7 11. Cohen S, Kamarck T, Mermelstein R. A global measure of perceived stress. *J Health*  
16  
17 8 *Soc Behav.* 1983;24(4):385–96.  
18  
19 9 12. Katsarou AL, Triposkiadis F, Panagiotakos D. Perceived stress and vascular disease:  
20  
21 10 where are we now? *Angiology.* 2013;64(7):529–34.  
22  
23 11 13. Stroud LR, Salovey P, Epel ES. Sex differences in stress responses: Social rejection  
24  
25 12 versus achievement stress. *Biol Psychiat.* 2002;52(4):318–27.  
26  
27 13 14. Matud MP. Gender differences in stress and coping styles. *Pers Individ Differ.*  
28  
29 14 2004;37(7):1401–15.  
30  
31 15 15. Koslowsky M. Commuting Stress: Problems of Definition and Variable Identification.  
32  
33 16 *Appl Psychol An-Int Rev.* 1997;46(2):153–73.  
34  
35 17 16. St-Louis E, Manaugh K, van Lierop D, El-Geneidy A. The happy commuter: A  
36  
37 18 comparison of commuter satisfaction across modes. *Transportation research. Part F, Traffic*  
38  
39 19 *psychology and behaviour.* 2014;26:160–70.  
40  
41 20 17. Lajeunesse S, Rodríguez D a. Mindfulness, time affluence, and journey-based affect:  
42  
43 21 Exploring relationships. *ransportation research. Part F, Traffic psychology and behaviour.*  
44  
45 22 2012;15(2):196–205.  
46  
47 23 18. Anable J, Gatersleben B. All work and no play? The role of instrumental and affective  
48  
49 24 factors in work and leisure journeys by different travel modes. *Transportation research. Part*  
50  
51 25 *A, Policy and practice.* 2005;39(2–3):163–81.  
52  
53  
54  
55  
56  
57  
58  
59  
60

- 1  
2  
3 1 19. Guell C, Ogilvie D. Picturing commuting: photovoice and seeking wellbeing in  
4  
5 2 everyday travel. *Qual Res.* 2015;15(2):201-218.  
6  
7 3 20. Titze S, Stronegger WJ, Janschitz S, Oja P. Association of built-environment, social-  
8  
9 4 environment and personal factors with bicycling as a mode of transportation among Austrian  
10  
11 5 city dwellers. *Prev Med.* 2008;47(3):252-9.  
12  
13 6 21. Brown BB, Smith KR, Hanson H, Fan JX, Kowaleski-Jones L, Zick CD.  
14  
15 7 Neighborhood design for walking and biking: physical activity and body mass index. *Am J*  
16  
17 8 *Prev Med;* 2013;44(3):231-8.  
18  
19 9 22. Fraser SDS, Lock K. Cycling for transport and public health: a systematic review of  
20  
21 10 the effect of the environment on cycling. *Eur J Public Health.* 2011;21(6).  
22  
23 11 23. Grasser G, Van Dyck D, Titze S, Stronegger W. Objectively measured walkability and  
24  
25 12 active transport and weight-related outcomes in adults: a systematic review. *Int J Public*  
26  
27 13 *Health;* 2013;58(4):615-25.  
28  
29 14 24. Cole-Hunter T, Donaire-Gonzalez D, Curto a., Ambros a., Valentin a., Garcia-  
30  
31 15 Aymerich J, et al. Objective correlates and determinants of bicycle commuting propensity in  
32  
33 16 an urban environment. *Transportation research. Part D Transport and environment.*  
34  
35 17 2015;40(2):132-43.  
36  
37 18 25. Triguero-Mas M, Dadvand P, Cirach M, Martínez D, Medina A, Mompert A, et al.  
38  
39 19 Natural outdoor environments and mental and physical health: Relationships and  
40  
41 20 mechanisms. *Environ Int.* 2015;77:35-41.  
42  
43 21 26. Dadvand P, Bartoll X, Basagaña X, Dalmau-Bueno A, Martinez D, Ambros A, et al.  
44  
45 22 Green spaces and General Health: Roles of mental health status, social support, and physical  
46  
47 23 activity. *Environ Int.* 2016;91:161-7.  
48  
49 24 27. Olsson LE, Gärling T, Ettema D, Friman M, Fujii S. Happiness and Satisfaction with  
50  
51 25 Work Commute. *Soc Indic Res.* 2013;111(1):255-63.  
52  
53  
54  
55  
56  
57  
58  
59  
60

- 1  
2  
3 1 28. Gottholmseder G, Nowotny K, Pruckner GJ, Theurl E. Stress perception and  
4  
5 2 commuting. *Health Econ*. 2009;18(5):559–76.  
6  
7 3 29. Ohta M, Mizoue T, Mishima N, Ikeda M. Effect of the physical activities in leisure  
8  
9 4 time and commuting to work on mental health. *J Occup Health*. 2007;49(1):46–52.  
10  
11 5 30. Hansson E, Mattisson K, Björk J, Östergren P-O, Jakobsson K. Relationship between  
12  
13 6 commuting and health outcomes in a cross-sectional population survey in southern Sweden.  
14  
15 7 *BMC Public Health*. 2011;11:834.  
16  
17 8 31. Donaire-Gonzalez D, Nazelle A De, Cole-Hunter T, Curto A, Rodriguez D, Mendez  
18  
19 9 M, et al. The Added Benefit of Bicycle Commuting on the Regular Amount of Physical  
20  
21 10 Activity Performed. *Am J Prev Med*. 2015;49(6):842–9.  
22  
23 11 32. Institut d’Estudis Regionals i Metropolitans de Barcelona. La Mobilitat quotidiana a  
24  
25 12 Catalunya. *Papers. Regió Metropolitana de Barcelona* 2008.  
26  
27 13 33. Forsyth A, Krizek KJ, Agrawal AW, Stonebraker E. Reliability testing of the  
28  
29 14 Pedestrian and Bicycling Survey (PABS) method. *J Phys Act Health*. 2012;9(5):677–88.  
30  
31 15 34. Warttig SL, Forshaw MJ, South J, White AK. New, normative, English-sample data  
32  
33 16 for the Short Form Perceived Stress Scale (PSS-4). *J Health Psychol*. 2013;18(12):1617–28.  
34  
35 17 35. Craig CL, Marshall AL, Sjostrom M, Bauman AE, Booth ML, Ainsworth BE.  
36  
37 18 International physical activity questionnaire: 12-country reliability and validity. *Med Sci*  
38  
39 19 *Sport Exerc*. 2003;35(8):1381–95.  
40  
41 20 36. Domínguez-Berjón MF, Borrell C, Cano-Serral G, Esnaola S, Nolasco A, Pasarín MI,  
42  
43 21 et al. [Constructing a deprivation index based on census data in large Spanish cities (the  
44  
45 22 MEDEA project)]. *Gac Sanit*. 2008 Jun;22(3):179–87.  
46  
47 23 37. Beelen R, Hoek G, Vienneau D, Eeftens M, Dimakopoulou K, Pedeli X, et al.  
48  
49 24 Development of NO<sub>2</sub> and NO<sub>x</sub> land use regression models for estimating air pollution  
50  
51  
52  
53  
54  
55  
56  
57  
58  
59  
60

- 1 exposure in 36 study areas in Europe – The ESCAPE project. *Atmospheric Environment*.  
2 2013 Jun;72(2):10–23.
- 3 38. World Health Organisation. *Guideline for Community Noise*. 2011.  
4 <http://www.who.int/docstore/peh/noise/Commnoise4.htm> (accessed 10 April 2015).
- 5 39. Winters M, Brauer M, Setton EM, Teschke K. Mapping bikeability: A spatial tool to  
6 support sustainable travel. *Environ Plan B Plan Des*. 2013;40(5):865–83.
- 7 40. Hastie TJ, Tibshirani R. Generalized additive models. *Stat Sci*. 1990;1(3):297–318.
- 8 41. Fox KR. The influence of physical activity on mental well-being. *Public Health Nutr*.  
9 1999;2(3A):411–8.
- 10 42. Sexton H, Sogaard a. J, Olstad R. How are mood and exercise related? Results from  
11 the Finnmark study. *Soc Psych Psych Epid*. 2001;36(7):348–53.
- 12 43. Peluso MA, Guerra de Andrade LH. Physical activity and mental health: the  
13 association between exercise and mood. *Clinics (Sao Paulo)*. 2005;60(1):61–70.
- 14 44. Galper DI, Trivedi MH, Barlow CE, Dunn AL, Kampert JB. Inverse association  
15 between physical inactivity and mental health in men and women. *Med Sci Sports Exerc*.  
16 2006;38(1):173–8.
- 17 45. Maas J, Verheij RA, Groenewegen PP, De Vries S, Spreeuwenberg P. Green space,  
18 urbanity, and health: how strong is the relation? *J Epidemiol Community Health*.  
19 2006;60(7):587–92.
- 20 46. Stults-Kolehmainen MA, Sinha R. The effects of stress on physical activity and  
21 exercise. *Sports Med*. 2014;44(1):81–121.
- 22 47. Baron RM, Kenny D a. The moderator-mediator variable distinction in social  
23 psychological research: conceptual, strategic, and statistical considerations. *J Pers Soc*  
24 *Psychol*. 1986;51(6):1173–82.
- 25

## SUPPLEMENTARY MATERIAL

**Table S1.** PSS4 questions used in TAPAS Travel Survey

**Q218.** In the last month, how often have you felt that you were unable to control important things in your life?

- 0** *Never*
- 1** *Almost never*
- 2** *Nearly always*
- 3** *Always*
- 997** Don't Know
- 998** Refuse to Answer

**Q219.** In the last month, how often have you felt confident about your ability to handle your personal problems?

- 0** *Never*
- 1** *Almost never*
- 2** *Nearly always*
- 3** *Always*
- 997** Don't Know
- 998** Refuse to Answer

**Q220.** In the last month, how often have you felt that things were going your way?

- 0** *Never*
- 1** *Almost never*
- 2** *Nearly always*
- 3** *Always*
- 997** Don't Know
- 998** Refuse to Answer

**Q221.** In the last month, how often have you felt that difficulties were piling up so high that you could not overcome them?

- 0** *Never*
- 1** *Almost never*
- 2** *Nearly always*
- 3** *Always*
- 997** Don't Know
- 998** Refuse to Answer

**Table S2.** PSS4 score distribution in TAPAS Travel Survey sample

| PSS-4 score | n   | %      | Cumulative % |
|-------------|-----|--------|--------------|
| 0           | 90  | 11.61  | 11.61        |
| 1           | 125 | 16.13  | 27.74        |
| 2           | 129 | 16.65  | 44.39        |
| 3           | 151 | 19.48  | 63.87        |
| 4           | 144 | 18.58  | 82.45        |
| 5           | 38  | 4.90   | 87.35        |
| 6           | 33  | 4.26   | 91.61        |
| 7           | 12  | 1.55   | 93.16        |
| 8           | 28  | 3.61   | 96.77        |
| 9           | 5   | 0.65   | 97.42        |
| 10          | 11  | 1.42   | 98.84        |
| 11          | 3   | 0.39   | 99.23        |
| 12          | 4   | 0.52   | 99.74        |
| 13          | 1   | 0.13   | 99.87        |
| 14          | 1   | 0.13   | 100.00       |
| Total       | 775 | 100.00 |              |

**Table S3.** Description of the individual and environmental determinants in TAPAS sample for Bicycle commuting levels and Bicycle commuting propensity.

| Variables                                                                    | Bicycle commuting levels |                |             |               |            |               |         | Bicycle commuting propensity |               |               |               |                  |               |                |               |         |
|------------------------------------------------------------------------------|--------------------------|----------------|-------------|---------------|------------|---------------|---------|------------------------------|---------------|---------------|---------------|------------------|---------------|----------------|---------------|---------|
|                                                                              | Low (109)                |                | Medium (65) |               | High (224) |               | p-value | Unwilling (230)              |               | Willing (160) |               | Infrequent (109) |               | Frequent (289) |               | p-value |
|                                                                              | n                        | %              | n           | %             | n          | %             |         | n                            | %             | n             | %             | n                | %             | n              | %             |         |
| <b>Outcome</b>                                                               |                          |                |             |               |            |               |         |                              |               |               |               |                  |               |                |               |         |
| Stressed (median)(Yes)                                                       | 49                       | 45.37          | 12          | 19.05         | 57         | 26.15         | <0.001  | 107                          | 46.93         | 55            | 34.81         | 49               | 45.37         | 69             | 24.56         | <0.001  |
| <b>Individual determinants</b>                                               |                          |                |             |               |            |               |         |                              |               |               |               |                  |               |                |               |         |
| Age (median; P25-P75)                                                        | 36                       | 28-42          | 36          | 28-45         | 35         | 29-41         | 0.777   | 37                           | 30-46         | 36            | 29.5-45       | 36               | 28-42         | 35             | 29-41         | 0.111   |
| Total PA – min/week (median; P25-P75)                                        | 494.99                   | 299.99-734.994 | 454.99      | 359.99-689.99 | 484.99     | 339.99-779.99 | 0.567   | 364.99                       | 209.99-600.00 | 404.99        | 209.99-629.99 | 494.99           | 299.99-734.99 | 480.00         | 339.99-744.99 | <0.001  |
| MVPA – min/week (median; P25-P75)                                            | 240.00                   | 134.99-480     | 294.99      | 189.99-390.00 | 300.00     | 177.49-479.99 | 0.092   | 90.00                        | 0-244.99      | 90.00         | 0-240.00      | 240.00           | 134.99-480.00 | 300.00         | 179.99-450.00 | <0.001  |
| VPA – min/week (median; P25-P75)                                             | 120.00                   | 0-224.99       | 90.00       | 0-199.99      | 102.50     | 0-240.00      | 0.386   | 45.00                        | 0-150.00      | 0             | 0-127.50      | 120.00           | 0-224.99      | 90.00          | 225.00        | <0.001  |
| Gender (Woman)                                                               | 49                       | 44.95          | 33          | 50.77         | 94         | 41.96         | 0.446   | 151                          | 65.65         | 83            | 51.88         | 49               | 44.95         | 127            | 43.94         | <0.001  |
| Country of birth (non-Spanish)                                               | 19                       | 17.59          | 7           | 10.77         | 30         | 13.39         | 0.412   | 16                           | 6.96          | 25            | 15.63         | 19               | 17.59         | 37             | 12.80         | 0.014   |
| Working status (Student)                                                     | 17                       | 15.60          | 10          | 15.38         | 24         | 10.71         | 0.364   | 24                           | 10.43         | 29            | 18.13         | 17               | 15.60         | 34             | 11.76         | 0.112   |
| Education level (University studies completed or equivalent-level education) | 81                       | 74.31          | 50          | 76.92         | 173        | 77.23         | 0.836   | 161                          | 70.00         | 86            | 53.75         | 81               | 74.31         | 223            | 77.16         | <0.001  |
| Living with family/partner                                                   | 88                       | 80.73          | 48          | 75.00         | 172        | 76.79         | 0.622   | 192                          | 83.48         | 135           | 84.38         | 88               | 80.73         | 220            | 76.39         | 0.114   |
| Employed people in household (2-5)                                           | 69                       | 63.30          | 35          | 55.56         | 145        | 64.73         | 0.410   | 152                          | 66.09         | 109           | 68.99         | 69               | 63.30         | 180            | 62.72         | 0.568   |
| MEDEA index                                                                  |                          |                |             |               |            |               | 0.627   |                              |               |               |               |                  |               |                |               | 0.660   |
| 1st tertile (least deprived)                                                 | 35                       | 32.11          | 23          | 35.38         | 75         | 33.48         |         | 81                           | 35.22         | 49            | 30.63         | 35               | 32.11         | 98             | 33.91         |         |
| 2nd tertile                                                                  | 38                       | 34.86          | 27          | 41.54         | 76         | 33.93         |         | 66                           | 28.70         | 56            | 35.00         | 38               | 34.86         | 103            | 35.64         |         |
| 3rd tertile (most deprived)                                                  | 36                       | 33.03          | 15          | 23.08         | 73         | 32.59         |         | 83                           | 36.09         | 55            | 34.38         | 36               | 33.03         | 88             | 30.45         |         |
| Children in household (Yes)                                                  | 31                       | 28.44          | 18          | 28.13         | 79         | 35.27         | 0.340   | 94                           | 40.87         | 57            | 35.85         | 31               | 28.44         | 97             | 33.68         | 0.128   |
| Children <3 years in household (Yes)                                         | 3                        | 2.75           | 5           | 7.94          | 20         | 8.93          | 0.114   | 20                           | 8.73          | 16            | 10.00         | 3                | 2.75          | 25             | 8.71          | 0.158   |
| Self-perceived health (Very good/Excellent)                                  | 43                       | 39.45          | 27          | 41.54         | 113        | 50.45         | 0.123   | 90                           | 39.13         | 50            | 31.25         | 43               | 39.45         | 140            | 48.44         | 0.004   |
| BMI (Overweight/Obese)                                                       | 25                       | 22.94          | 14          | 21.54         | 49         | 21.88         | 0.969   | 73                           | 31.88         | 51            | 32.08         | 25               | 22.94         | 63             | 21.8          | 0.021   |
| Chronic disease (Yes)                                                        | 11                       | 10.09          | 8           | 12.31         | 17         | 7.59          | 0.458   | 18                           | 7.83          | 7             | 4.38          | 11               | 10.09         | 25             | 8.65          | 0.293   |
| Stress releasing (Agreement)                                                 | 95                       | 87.16          | 62          | 98.41         | 199        | 90.05         | 0.047   | 163                          | 72.44         | 139           | 89.68         | 95               | 87.16         | 261            | 91.90         | <0.001  |
| Bicycle trip enjoyment (Agreement)                                           | 103                      | 94.50          | 65          | 100.00        | 212        | 95.93         | 0.175   | 116                          | 51.79         | 133           | 84.71         | 103              | 94.50         | 277            | 96.85         | <0.001  |
| <b>Environmental determinants</b>                                            |                          |                |             |               |            |               |         |                              |               |               |               |                  |               |                |               |         |
| Commute distance, estimated (km) (mean;SD)                                   | 3.73                     | 1.97           | 3.43        | 1.70          | 3.13       | 1.52          | 0.044   | 4.42                         | 2.35          | 4.32          | 2.11          | 3.73             | 1.97          | 3.20           | 1.56          | <0.001  |
| Public bicycle stations (mean;SD)                                            |                          |                |             |               |            |               |         |                              |               |               |               |                  |               |                |               |         |
| Home, count in 400m buffer                                                   | 4.61                     | 2.61           | 4.97        | 2.63          | 4.75       | 2.35          | 0.492   | 3.77                         | 2.53          | 4.32          | 2.11          | 3.73             | 1.97          | 3.20           | 1.56          | <0.001  |
| Work/study, count in 400m buffer                                             | 4.89                     | 2.96           | 5.89        | 3.11          | 5.39       | 3.05          | 0.124   | 4.36                         | 2.96          | 4.71          | 3.35          | 4.89             | 2.96          | 5.50           | 3.06          | <0.001  |
| Greenness, NDVI (mean;SD)                                                    |                          |                |             |               |            |               |         |                              |               |               |               |                  |               |                |               |         |
| Home, average of 400m buffer                                                 | 0.83                     | 1.30           | 0.75        | 0.98          | 0.59       | 0.94          | 0.635   | 0.90                         | 1.03          | 0.91          | 1.16          | 0.83             | 1.30          | 0.62           | 0.95          | 0.002   |
| Work/study, average of 400m buffer                                           | 0.60                     | 0.82           | 0.37        | 0.57          | 0.58       | 0.90          | 0.136   | 0.68                         | 1.11          | 0.74          | 1.01          | 0.60             | 0.82          | 0.53           | 0.84          | 0.328   |
| Commute route, average of RBA                                                | 0.95                     | 0.94           | 0.76        | 0.83          | 0.87       | 0.81          | 0.322   | 1.10                         | 1.11          | 1.02          | 0.98          | 0.95             | 0.94          | 0.84           | 0.81          | 0.236   |
| NO <sub>2</sub> ppb (mean;SD)                                                |                          |                |             |               |            |               |         |                              |               |               |               |                  |               |                |               |         |
| Home, concentration in 400m buffer                                           | 74.76                    | 18.70          | 77.24       | 16.14         | 78.40      | 17.90         | 0.186   | 75.59                        | 17.08         | 74.51         | 17.20         | 74.76            | 18.70         | 78.14          | 17.49         | 0.063   |
| Work/study, concentration in 400m buffer                                     | 76.49                    | 21.63          | 83.02       | 18.82         | 77.81      | 21.37         | 0.091   | 78.50                        | 23.84         | 78.64         | 24.11         | 76.49            | 21.63         | 79.00          | 20.90         | 0.727   |
| Commute route, concentration in RBA                                          | 82.86                    | 16.10          | 87.47       | 15.22         | 84.51      | 18.08         | 0.127   | 85.22                        | 17.34         | 82.76         | 15.95         | 82.86            | 16.10         | 85.19          | 17.48         | 0.296   |
| Noise, >55dB (mean;SD)                                                       |                          |                |             |               |            |               |         |                              |               |               |               |                  |               |                |               |         |
| Home, proportion in 400m buffer                                              | 78.73                    | 13.39          | 77.65       | 9.77          | 78.63      | 11.54         | 0.554   | 79.03                        | 11.00         | 78.39         | 11.01         | 78.73            | 13.39         | 78.41          | 11.16         | 0.847   |
| Work/study, proportion in 400m buffer                                        | 81.64                    | 13.60          | 80.04       | 13.80         | 79.32      | 15.04         | 0.468   | 78.46                        | 15.47         | 80.00         | 13.94         | 81.64            | 13.60         | 79.48          | 14.75         | 0.434   |
| Commute route, proportion in RBA                                             | 78.62                    | 9.13           | 75.40       | 9.26          | 77.21      | 9.64          | 0.057   | 77.12                        | 8.43          | 78.08         | 8.78          | 78.62            | 9.13          | 76.80          | 9.57          | 0.160   |
| Bikeability (mean;SD)                                                        |                          |                |             |               |            |               |         |                              |               |               |               |                  |               |                |               |         |
| Home, concentration in 400m buffer                                           | 6.29                     | 1.44           | 6.49        | 1.23          | 6.54       | 1.27          | 0.330   | 5.88                         | 1.45          | 6.00          | 1.45          | 6.29             | 1.44          | 6.53           | 1.26          | <0.001  |
| Work/study, concentration in 400m buffer                                     | 6.82                     | 1.28           | 6.88        | 0.98          | 6.75       | 1.17          | 0.638   | 6.21                         | 1.58          | 6.46          | 1.47          | 6.82             | 1.28          | 6.78           | 1.13          | <0.001  |
| Commute route, concentration in RBA                                          | 6.77                     | 1.10           | 7.02        | 0.93          | 6.99       | 0.93          | 0.236   | 6.36                         | 1.22          | 6.58          | 1.16          | 6.77             | 1.10          | 7.00           | 0.93          | <0.001  |

PA, Physical Activity; MVPA, Moderate-to-Vigorous Physical Activity; VPA, Vigorous Physical Activity; BMI, Body Mass Index. Data are n and %, unless otherwise noted. There are missing data in: Perceived stress (13; 1.65%), Country of birth (1; 0.13%), Living with family/partner (1; 0.13%), Employed people in household (4; 0.51), Children in household (2; 0.25%), Children <3years old in household (3; 0.38), BMI (2; 0.25%); Stress releasing (15; 1.90%), Bicycle trip enjoyment (12; 1.52%), Commute distance (20; 2.54%), Greenness (20; 2.54%), NO<sub>2</sub> (20; 2.54%) . <sup>a</sup>Chi square test, instead of Age, Total PA, MVPA, VPA, and all the Environmental determinants (U Mann Whitney test).



**Table S4.** Sensitivity analyses exploring the relationships between perceived stress (P75, P90) and all covariates.

| Variable                                                                     | Perceived stress (P75) |         | Perceived stress (P90) |         |
|------------------------------------------------------------------------------|------------------------|---------|------------------------|---------|
|                                                                              | RR (95% CI)            | p-value | RR (95% CI)            | p-value |
| <b>Individual determinants</b>                                               |                        |         |                        |         |
| Age                                                                          | 1.00 (0.99, 1.02)      | 0.793   | 1.00 (0.97, 1.02)      | 0.662   |
| Total PA - min/week                                                          | 1.00 (0.99, 1.00)      | 0.113   | 1.00 (0.99, 1.00)      | 0.802   |
| MVPA - min/week                                                              | 1.00 (0.99, 1.00)      | 0.197   | 1.00 (0.99, 1.00)      | 0.701   |
| VPA - min/week                                                               | 1.00 (0.99, 1.00)      | 0.382   | 1.00 (0.99, 1.00)      | 0.743   |
| Gender (Woman)                                                               | 1.41 (1.03, 1.93)      | 0.032   | 1.69 (1.04, 2.76)      | 0.035   |
| Country of birth (non-Spanish)                                               | 1.16 (0.75, 1.78)      | 0.515   | 1.14 (0.58, 2.24)      | 0.695   |
| Working status (Student)                                                     | 1.46 (0.99, 2.14)      | 0.051   | 1.04 (0.53, 2.04)      | 0.904   |
| Education level (University studies completed or equivalent-level education) | 0.78 (0.57, 1.07)      | 0.119   | 0.80 (0.49, 1.30)      | 0.369   |
| Living with family/partner                                                   | 1.00 (0.68, 1.47)      | 0.987   | 0.94 (0.53, 1.68)      | 0.841   |
| Employed people in household (2-5)                                           | 0.67 (0.50, 0.91)      | 0.011   | 0.75 (0.47, 1.20)      | 0.231   |
| MEDEA index                                                                  |                        |         |                        |         |
| 1st tertile (least deprived)                                                 | 1.00                   |         | 1.00                   |         |
| 2nd tertile                                                                  | 1.42 (0.96, 2.11)      | 0.081   | 1.85 (0.99, 3.46)      | 0.054   |
| 3rd tertile (most deprived)                                                  | 1.45 (0.97, 2.14)      | 0.067   | 1.77 (0.94, 3.33)      | 0.076   |
| Children in household (Yes)                                                  | 1.05 (0.76, 1.44)      | 0.778   | 0.92 (0.56, 1.51)      | 0.743   |
| Children <3 years in household (Yes)                                         | 0.61 (0.30, 1.25)      | 0.180   | 0.54 (0.17, 1.68)      | 0.289   |
| Self-perceived health (Very good/Excellent)                                  | 0.65 (0.47, 0.91)      | 0.011   | 0.88 (0.55, 1.42)      | 0.604   |
| BMI (Overweight/Obese)                                                       | 1.08 (0.77, 1.51)      | 0.664   | 1.03 (0.61, 1.73)      | 0.922   |
| Chronic disease (Yes)                                                        | 1.58 (1.01, 2.48)      | 0.047   | 1.66 (0.83, 3.32)      | 0.150   |
| Stress releasing (Agreement)                                                 | 0.85 (0.57, 1.27)      | 0.423   | 0.94 (0.49, 1.79)      | 0.850   |
| Bicycle trip enjoyment (Agreement)                                           | 0.74 (0.52, 1.04)      | 0.085   | 0.79 (0.46, 1.37)      | 0.409   |
| <b>Environmental determinants</b>                                            |                        |         |                        |         |
| Commute distance, estimated (km)                                             | 1.07 (0.99, 1.14)      | 0.053   | 1.03 (0.92, 1.15)      | 0.620   |
| Public bicycle stations                                                      |                        |         |                        |         |
| Home, count in 400m buffer                                                   | 0.99 (0.93, 1.06)      | 0.770   | 0.94 (0.84, 1.04)      | 0.253   |
| Work/study, count in 400m buffer                                             | 0.96 (0.91, 1.01)      | 0.103   | 0.96 (0.89, 1.03)      | 0.242   |
| Greenness, NDVI                                                              |                        |         |                        |         |
| Home, average of 400m buffer                                                 | 0.95 (0.79, 1.14)      | 0.557   | 1.04 (0.81, 1.33)      | 0.768   |
| Work/study, average of 400m buffer                                           | 1.09 (0.94, 1.27)      | 0.262   | 0.99 (0.74, 1.32)      | 0.936   |
| Commute route, average of RBA                                                | 1.04 (0.88, 1.22)      | 0.655   | 1.18 (0.95, 1.47)      | 0.138   |
| NO <sub>2</sub> ppb                                                          |                        |         |                        |         |
| Home, concentration in 400m buffer                                           | 1.00 (0.99, 1.00)      | 0.390   | 1.00 (0.98, 1.01)      | 0.728   |
| Work/study, concentration in 400m buffer                                     | 0.99 (0.99, 1.00)      | 0.042   | 0.99 (0.98, 1.00)      | 0.076   |
| Commute route, concentration in RBA                                          | 1.00 (0.99, 1.01)      | 0.474   | 0.99 (0.97, 1.00)      | 0.138   |
| Noise, >55dB                                                                 |                        |         |                        |         |
| Home, proportion in 400m buffer                                              | 1.01 (0.99, 1.02)      | 0.483   | 1.00 (0.98, 1.03)      | 0.845   |
| Work/study, proportion in 400m buffer                                        | 1.00 (0.99, 1.01)      | 0.549   | 1.00 (0.98, 1.02)      | 0.835   |
| Commute route, proportion in RBA                                             | 1.00 (0.98, 1.01)      | 0.854   | 1.01 (0.98, 1.04)      | 0.444   |
| Bikeability                                                                  |                        |         |                        |         |
| Home, concentration in 400m buffer                                           | 0.97 (0.87, 1.08)      | 0.532   | 0.92 (0.78, 1.09)      | 0.356   |
| Work/study, concentration in 400m buffer                                     | 0.92 (0.82, 1.02)      | 0.108   | 0.89 (0.75, 1.07)      | 0.216   |
| Commute route, concentration in RBA                                          | 0.88 (0.77, 1.00)      | 0.055   | 0.81 (0.66, 0.99)      | 0.042   |

PA, Physical Activity; MVPA, Moderate-to-Vigorous Physical Activity; VPA, Vigorous Physical Activity; BMI, Body Mass Index. There are missing data in: Perceived stress (13; 1.65%), Country of birth (1; 0.13%), People living with in household (1; 0.13%), Employed people in household (4; 0.51), Children in household (2; 0.25%), Children <3 years old in household (3; 0.38), BMI (2; 0.25%), Stress releasing (15; 1.90%), Bicycle trip enjoyment (12; 1.52%), Commute distance (20; 2.54%), Greenness (20; 2.54%), NO<sub>2</sub> (20; 2.54%).

**Table S5.** Sensitivity analyses exploring the relationships between bicycle commuting (Bicycle commuting status, Bicycle commuting levels, Bicycle commuting propensity) and perceived stress (P75, P90).

| Variable                                           | Perceived stress (P75) |              |                                   |         |                                   |         |                                   |              | Perceived stress (P90) |         |                                   |         |                                   |              |                                   |         |              |        |      |              |        |      |              |        |
|----------------------------------------------------|------------------------|--------------|-----------------------------------|---------|-----------------------------------|---------|-----------------------------------|--------------|------------------------|---------|-----------------------------------|---------|-----------------------------------|--------------|-----------------------------------|---------|--------------|--------|------|--------------|--------|------|--------------|--------|
|                                                    | RR Unadjusted (95% CI) | p-value      | RR Adjusted <sup>a</sup> (95% CI) | p-value | RR Adjusted <sup>b</sup> (95% CI) | p-value | RR Adjusted <sup>c</sup> (95% CI) | p-value      | RR Unadjusted (95% CI) | p-value | RR Adjusted <sup>a</sup> (95% CI) | p-value | RR Adjusted <sup>b</sup> (95% CI) | p-value      | RR Adjusted <sup>c</sup> (95% CI) | p-value |              |        |      |              |        |      |              |        |
| <b>All sample (771)</b>                            |                        |              |                                   |         |                                   |         |                                   |              |                        |         |                                   |         |                                   |              |                                   |         |              |        |      |              |        |      |              |        |
| Bicycle commuting status                           |                        |              |                                   |         |                                   |         |                                   |              |                        |         |                                   |         |                                   |              |                                   |         |              |        |      |              |        |      |              |        |
| Non-bicycle commuters                              | 1.00                   |              | 1.00                              |         | 1.00                              |         | 1.00                              |              | 1.00                   |         | 1.00                              |         | 1.00                              |              | 1.00                              |         |              |        |      |              |        |      |              |        |
| Bicycle commuters                                  | 0.58                   | (0.42, 0.79) | 0.001                             | 0.58    | (0.42, 0.79)                      | 0.001   | 0.61                              | (0.44, 0.85) | 0.004                  | 0.64    | (0.46, 0.90)                      | 0.011   | 0.54                              | (0.33, 0.89) | 0.014                             | 0.56    | (0.34, 0.93) | 0.025  | 0.52 | (0.31, 0.88) | 0.014  | 0.56 | (0.33, 0.95) | 0.032  |
| Bicycle commuting levels                           |                        |              |                                   |         |                                   |         |                                   |              |                        |         |                                   |         |                                   |              |                                   |         |              |        |      |              |        |      |              |        |
| Non-bicycle commuters (0 days)                     | 1.00                   |              | 1.00                              |         | 1.00                              |         | 1.00                              |              | 1.00                   |         | 1.00                              |         | 1.00                              |              | 1.00                              |         | 1.00         |        |      |              |        |      |              |        |
| Low bicycle commuting (1-3 days)                   | 1.04                   | (0.71, 1.54) | 0.832                             | 1.03    | (0.70, 1.53)                      | 0.868   | 1.08                              | (0.73, 1.59) | 0.708                  | 1.10    | (0.74, 1.64)                      | 0.626   | 1.20                              | (0.68, 2.11) | 0.535                             | 1.22    | (0.68, 2.21) | 0.505  | 1.14 | (0.63, 2.07) | 0.662  | 1.18 | (0.65, 2.14) | 0.573  |
| Medium bicycle commuting (4 days)                  | 0.22                   | (0.07, 0.66) | 0.007                             | 0.20    | (0.07, 0.62)                      | 0.005   | 0.21                              | (0.07, 0.65) | 0.007                  | 0.22    | (0.07, 0.68)                      | 0.009   | 0.15                              | (0.02, 1.05) | 0.056                             | 0.14    | (0.02, 1.00) | 0.050  | 0.14 | (0.02, 0.95) | 0.044  | 0.15 | (0.02, 1.04) | 0.054  |
| High bicycle commuting (>=5 days)                  | 0.45                   | (0.29, 0.70) | <0.001                            | 0.46    | (0.30, 0.72)                      | 0.001   | 0.50                              | (0.32, 0.78) | 0.003                  | 0.52    | (0.33, 0.82)                      | 0.005   | 0.34                              | (0.16, 0.70) | 0.004                             | 0.36    | (0.17, 0.75) | 0.005  | 0.33 | (0.15, 0.69) | 0.004  | 0.35 | (0.17, 0.73) | 0.005  |
| Bicycle commuting propensity                       |                        |              |                                   |         |                                   |         |                                   |              |                        |         |                                   |         |                                   |              |                                   |         |              |        |      |              |        |      |              |        |
| Unwilling Non-bicycle commuters                    | 1.00                   |              | 1.00                              |         | 1.00                              |         | 1.00                              |              | 1.00                   |         | 1.00                              |         | 1.00                              |              | 1.00                              |         | 1.00         |        |      |              |        |      |              |        |
| Willing Non-bicycle commuters                      | 0.71                   | (0.47, 1.06) | 0.090                             | 0.74    | (0.49, 1.10)                      | 0.135   | 0.71                              | (0.48, 1.06) | 0.095                  | 0.72    | (0.48, 1.08)                      | 0.116   | 0.66                              | (0.35, 1.22) | 0.183                             | 0.70    | (0.38, 1.30) | 0.255  | 0.70 | (0.37, 1.30) | 0.253  | 0.71 | (0.38, 1.35) | 0.298  |
| Infrequent Bicycle commuters                       | 0.92                   | (0.61, 1.38) | 0.684                             | 0.92    | (0.61, 1.39)                      | 0.695   | 0.94                              | (0.63, 1.43) | 0.788                  | 0.97    | (0.64, 1.48)                      | 0.890   | 1.03                              | (0.57, 1.87) | 0.926                             | 1.07    | (0.57, 2.01) | 0.831  | 1.00 | (0.53, 1.88) | 0.991  | 1.04 | (0.54, 1.98) | 0.915  |
| Frequent Bicycle commuters                         | 0.35                   | (0.23, 0.54) | <0.001                            | 0.36    | (0.23, 0.55)                      | <0.001  | 0.38                              | (0.24, 0.59) | <0.001                 | 0.40    | (0.25, 0.62)                      | <0.001  | 0.25                              | (0.12, 0.52) | <0.001                            | 0.27    | (0.13, 0.56) | <0.001 | 0.25 | (0.12, 0.52) | <0.001 | 0.27 | (0.13, 0.56) | <0.001 |
| <b>Bicycle commuters sample (387)</b>              |                        |              |                                   |         |                                   |         |                                   |              |                        |         |                                   |         |                                   |              |                                   |         |              |        |      |              |        |      |              |        |
| Bicycle commuting levels                           |                        |              |                                   |         |                                   |         |                                   |              |                        |         |                                   |         |                                   |              |                                   |         |              |        |      |              |        |      |              |        |
| Low bicycle commuting (1-3 days)                   | 1.00                   |              | 1.00                              |         | 1.00                              |         | 1.00                              |              | 1.00                   |         | 1.00                              |         | 1.00                              |              | 1.00                              |         | 1.00         |        |      |              |        |      |              |        |
| Medium bicycle commuting (4 days)                  | 0.21                   | (0.06, 0.66) | 0.008                             | 0.19    | (0.06, 0.61)                      | 0.005   | 0.19                              | (0.06, 0.60) | 0.005                  | 0.19    | (0.06, 0.60)                      | 0.004   | 0.12                              | (0.02, 0.92) | 0.041                             | 0.11    | (0.02, 0.83) | 0.032  | 0.11 | (0.02, 0.80) | 0.028  | 0.11 | (0.02, 0.76) | 0.026  |
| High bicycle commuting (>=5 days)                  | 0.43                   | (0.26, 0.73) | 0.002                             | 0.44    | (0.26, 0.75)                      | 0.002   | 0.44                              | (0.26, 0.75) | 0.002                  | 0.44    | (0.26, 0.73)                      | 0.002   | 0.28                              | (0.12, 0.65) | 0.003                             | 0.28    | (0.12, 0.65) | 0.003  | 0.27 | (0.12, 0.64) | 0.003  | 0.27 | (0.12, 0.60) | 0.001  |
| Bicycle commuters propensity                       |                        |              |                                   |         |                                   |         |                                   |              |                        |         |                                   |         |                                   |              |                                   |         |              |        |      |              |        |      |              |        |
| Infrequent (1-3 days)                              | 1.00                   |              | 1.00                              |         | 1.00                              |         | 1.00                              |              | 1.00                   |         | 1.00                              |         | 1.00                              |              | 1.00                              |         | 1.00         |        |      |              |        |      |              |        |
| Frequent (>=4 days)                                | 0.38                   | (0.23, 0.64) | <0.001                            | 0.38    | (0.23, 0.63)                      | <0.001  | 0.38                              | (0.23, 0.63) | <0.001                 | 0.38    | (0.23, 0.62)                      | <0.001  | 0.25                              | (0.11, 0.55) | 0.001                             | 0.24    | (0.11, 0.55) | 0.001  | 0.24 | (0.10, 0.54) | 0.001  | 0.23 | (0.11, 0.51) | <0.001 |
| <b>Exposure Non-bicycle commuters sample (384)</b> |                        |              |                                   |         |                                   |         |                                   |              |                        |         |                                   |         |                                   |              |                                   |         |              |        |      |              |        |      |              |        |
| Non-bicycle commuters                              |                        |              |                                   |         |                                   |         |                                   |              |                        |         |                                   |         |                                   |              |                                   |         |              |        |      |              |        |      |              |        |
| Unwilling                                          | 1.00                   |              | 1.00                              |         | 1.00                              |         | 1.00                              |              | 1.00                   |         | 1.00                              |         | 1.00                              |              | 1.00                              |         | 1.00         |        |      |              |        |      |              |        |
| Willing                                            | 0.71                   | (0.47, 1.06) | 0.090                             | 0.72    | (0.48, 1.07)                      | 0.106   | 0.67                              | (0.45, 1.00) | 0.051                  | 0.69    | (0.46, 1.03)                      | 0.068   | 0.66                              | (0.35, 1.22) | 0.183                             | 0.68    | (0.36, 1.26) | 0.222  | 0.68 | (0.36, 1.26) | 0.221  | 0.71 | (0.37, 1.36) | 0.300  |

<sup>a</sup>Adjusted by Gender, Country of birth, Employed people in household, Chronic disease. <sup>b</sup>Adjusted by Age, Gender, Country of birth, Employed people in household, Chronic disease, Self-perceived health, Moderate-to-Vigorous Physical Activity (MVPA). <sup>c</sup>Adjusted by Age, Gender, Country of birth, Employed people in household, Chronic disease, Self-perceived health, MVPA, Public bicycle stations at work/study, Bikeability at work/study, Bikeability at commute route. Data were collected from June 2011 through to May 2012 in Barcelona, Spain.

## STROBE Statement—checklist of items that should be included in reports of observational studies

|                           | Item No | Recommendation                                                                                                                                                                                                                                                                                                                                                                                                                                                         | Reported in page  |
|---------------------------|---------|------------------------------------------------------------------------------------------------------------------------------------------------------------------------------------------------------------------------------------------------------------------------------------------------------------------------------------------------------------------------------------------------------------------------------------------------------------------------|-------------------|
| <b>Title and abstract</b> | 1       | (a) Indicate the study's design with a commonly used term in the title or the abstract                                                                                                                                                                                                                                                                                                                                                                                 | Page 2            |
|                           |         | (b) Provide in the abstract an informative and balanced summary of what was done and what was found                                                                                                                                                                                                                                                                                                                                                                    | Page 2            |
| <b>Introduction</b>       |         |                                                                                                                                                                                                                                                                                                                                                                                                                                                                        |                   |
| Background/rationale      | 2       | Explain the scientific background and rationale for the investigation being reported                                                                                                                                                                                                                                                                                                                                                                                   | Pages 4, 5        |
| Objectives                | 3       | State specific objectives, including any prespecified hypotheses                                                                                                                                                                                                                                                                                                                                                                                                       | Page 5            |
| <b>Methods</b>            |         |                                                                                                                                                                                                                                                                                                                                                                                                                                                                        |                   |
| Study design              | 4       | Present key elements of study design early in the paper                                                                                                                                                                                                                                                                                                                                                                                                                | Page 6            |
| Setting                   | 5       | Describe the setting, locations, and relevant dates, including periods of recruitment, exposure, follow-up, and data collection                                                                                                                                                                                                                                                                                                                                        | Pages 6, 7        |
| Participants              | 6       | (a) <i>Cohort study</i> —Give the eligibility criteria, and the sources and methods of selection of participants. Describe methods of follow-up<br><i>Case-control study</i> —Give the eligibility criteria, and the sources and methods of case ascertainment and control selection. Give the rationale for the choice of cases and controls<br><i>Cross-sectional study</i> —Give the eligibility criteria, and the sources and methods of selection of participants | Pages 6, 7        |
|                           |         | (b) <i>Cohort study</i> —For matched studies, give matching criteria and number of exposed and unexposed<br><i>Case-control study</i> —For matched studies, give matching criteria and the number of controls per case                                                                                                                                                                                                                                                 | -                 |
| Variables                 | 7       | Clearly define all outcomes, exposures, predictors, potential confounders, and effect modifiers. Give diagnostic criteria, if applicable                                                                                                                                                                                                                                                                                                                               | Pages 7, 8, 9, 10 |
| Data sources/measurement  | 8*      | For each variable of interest, give sources of data and details of methods of assessment (measurement). Describe comparability of assessment methods if there is more than one group                                                                                                                                                                                                                                                                                   | Pages 7, 8, 9, 10 |
| Bias                      | 9       | Describe any efforts to address potential sources of bias                                                                                                                                                                                                                                                                                                                                                                                                              | Pages 6, 7        |
| Study size                | 10      | Explain how the study size was arrived at                                                                                                                                                                                                                                                                                                                                                                                                                              | Pages 6, 7        |
| Quantitative variables    | 11      | Explain how quantitative variables were handled in the analyses. If applicable, describe which groupings were chosen and why                                                                                                                                                                                                                                                                                                                                           | Pages 7, 8, 9, 10 |
| Statistical methods       | 12      | (a) Describe all statistical methods, including those used to control for confounding                                                                                                                                                                                                                                                                                                                                                                                  | Page 10           |
|                           |         | (b) Describe any methods used to examine subgroups and interactions                                                                                                                                                                                                                                                                                                                                                                                                    | Page 10           |
|                           |         | (c) Explain how missing data were addressed                                                                                                                                                                                                                                                                                                                                                                                                                            | Page 10           |
|                           |         | (d) <i>Cohort study</i> —If applicable, explain how loss to follow-up was addressed<br><i>Case-control study</i> —If applicable, explain how matching of cases and controls was addressed<br><i>Cross-sectional study</i> —If applicable, describe analytical methods taking account of sampling strategy                                                                                                                                                              | Page 10           |
|                           |         | (e) Describe any sensitivity analyses                                                                                                                                                                                                                                                                                                                                                                                                                                  | Pages 7, 8, 10    |

Continued on next page

| <b>Results</b>           |     |                                                                                                                                                                                                              | <b>Reported in page</b>                 |
|--------------------------|-----|--------------------------------------------------------------------------------------------------------------------------------------------------------------------------------------------------------------|-----------------------------------------|
| Participants             | 13* | (a) Report numbers of individuals at each stage of study—eg numbers potentially eligible, examined for eligibility, confirmed eligible, included in the study, completing follow-up, and analysed            | Page 6                                  |
|                          |     | (b) Give reasons for non-participation at each stage                                                                                                                                                         | Page 6                                  |
|                          |     | (c) Consider use of a flow diagram                                                                                                                                                                           | In previous papers                      |
| Descriptive data         | 14* | (a) Give characteristics of study participants (eg demographic, clinical, social) and information on exposures and potential confounders                                                                     | Pages 10, 11, 12, 13, 14                |
|                          |     | (b) Indicate number of participants with missing data for each variable of interest                                                                                                                          | Pages 6, 13, 14                         |
|                          |     | (c) <i>Cohort study</i> —Summarise follow-up time (eg, average and total amount)                                                                                                                             | -                                       |
| Outcome data             | 15* | <i>Cohort study</i> —Report numbers of outcome events or summary measures over time                                                                                                                          | -                                       |
|                          |     | <i>Case-control study</i> —Report numbers in each exposure category, or summary measures of exposure                                                                                                         | -                                       |
|                          |     | <i>Cross-sectional study</i> —Report numbers of outcome events or summary measures                                                                                                                           | Pages 10, 11, 12, 13, 14                |
| Main results             | 16  | (a) Give unadjusted estimates and, if applicable, confounder-adjusted estimates and their precision (eg, 95% confidence interval). Make clear which confounders were adjusted for and why they were included | Pages 15, 16, 17                        |
|                          |     | (b) Report category boundaries when continuous variables were categorized                                                                                                                                    | Pages 7, 8                              |
|                          |     | (c) If relevant, consider translating estimates of relative risk into absolute risk for a meaningful time period                                                                                             | -                                       |
| Other analyses           | 17  | Report other analyses done—eg analyses of subgroups and interactions, and sensitivity analyses                                                                                                               | Pages 3, 4, 5 of Supplementary material |
| <b>Discussion</b>        |     |                                                                                                                                                                                                              |                                         |
| Key results              | 18  | Summarise key results with reference to study objectives                                                                                                                                                     | Page 18                                 |
| Limitations              | 19  | Discuss limitations of the study, taking into account sources of potential bias or imprecision. Discuss both direction and magnitude of any potential bias                                                   | Page 20                                 |
| Interpretation           | 20  | Give a cautious overall interpretation of results considering objectives, limitations, multiplicity of analyses, results from similar studies, and other relevant evidence                                   | Pages 18, 19, 20, 21                    |
| Generalisability         | 21  | Discuss the generalisability (external validity) of the study results                                                                                                                                        | Pages 20                                |
| <b>Other information</b> |     |                                                                                                                                                                                                              |                                         |
| Funding                  | 22  | Give the source of funding and the role of the funders for the present study and, if applicable, for the original study on which the present article is based                                                | Page 22                                 |

\*Give information separately for cases and controls in case-control studies and, if applicable, for exposed and unexposed groups in cohort and cross-sectional studies.

**Note:** An Explanation and Elaboration article discusses each checklist item and gives methodological background and published examples of transparent reporting. The STROBE checklist is best used in conjunction with this article (freely available on the Web sites of PLoS Medicine at <http://www.plosmedicine.org/>, Annals of Internal Medicine at <http://www.annals.org/>, and Epidemiology at <http://www.epidem.com/>). Information on the STROBE Initiative is available at [www.strobe-statement.org](http://www.strobe-statement.org).

# BMJ Open

## The relationship between bicycle commuting and perceived stress: a cross-sectional study

|                                 |                                                                                                                                                                                                                                                                                                                                                                                                                                                                                                                                                                                                                                                                                                  |
|---------------------------------|--------------------------------------------------------------------------------------------------------------------------------------------------------------------------------------------------------------------------------------------------------------------------------------------------------------------------------------------------------------------------------------------------------------------------------------------------------------------------------------------------------------------------------------------------------------------------------------------------------------------------------------------------------------------------------------------------|
| Journal:                        | <i>BMJ Open</i>                                                                                                                                                                                                                                                                                                                                                                                                                                                                                                                                                                                                                                                                                  |
| Manuscript ID                   | bmjopen-2016-013542.R2                                                                                                                                                                                                                                                                                                                                                                                                                                                                                                                                                                                                                                                                           |
| Article Type:                   | Research                                                                                                                                                                                                                                                                                                                                                                                                                                                                                                                                                                                                                                                                                         |
| Date Submitted by the Author:   | 13-Feb-2017                                                                                                                                                                                                                                                                                                                                                                                                                                                                                                                                                                                                                                                                                      |
| Complete List of Authors:       | Avila-Palencia, Ione; ISGlobal, Centre for Research in Environmental Epidemiology (CREAL),<br>de Nazelle, Audrey; Centre for Environmental Policy, Imperial College of London<br>Cole-Hunter, Tom; Colorado State University, Department of Environmental and Radiological Health Sciences<br>Donaire-Gonzalez, David; ISGlobal, Centre for Research in Environmental Epidemiology (CREAL)<br>Jerrett, Michael; University of California Los Angeles, Department of Environmental Health Sciences<br>Rodriguez, Daniel; University of California Berkeley, Department of City and Regional Planning<br>Nieuwenhuijsen, Mark; ISGlobal, Centre for Research in Environmental Epidemiology (CREAL) |
| <b>Primary Subject Heading</b>: | Epidemiology                                                                                                                                                                                                                                                                                                                                                                                                                                                                                                                                                                                                                                                                                     |
| Secondary Subject Heading:      | Mental health, Public health                                                                                                                                                                                                                                                                                                                                                                                                                                                                                                                                                                                                                                                                     |
| Keywords:                       | EPIDEMIOLOGY, MENTAL HEALTH, PUBLIC HEALTH                                                                                                                                                                                                                                                                                                                                                                                                                                                                                                                                                                                                                                                       |
|                                 |                                                                                                                                                                                                                                                                                                                                                                                                                                                                                                                                                                                                                                                                                                  |

SCHOLARONE™  
Manuscripts

1  
2  
3  
4 1 **THE RELATIONSHIP BETWEEN BICYCLE COMMUTING**  
5  
6 2 **AND PERCEIVED STRESS: A CROSS-SECTIONAL STUDY**  
7

8  
9 3 Ione Avila-Palencia, MPH<sup>1,2,3</sup>; Audrey de Nazelle, PhD<sup>4</sup>; Tom Cole-Hunter, PhD<sup>5</sup>; David  
10  
11 4 Donaire-Gonzalez, PhD<sup>1,3,6</sup>; Michael Jerrett, PhD<sup>7</sup>; Daniel A. Rodriguez, PhD<sup>8</sup>; Mark J  
12  
13 5 Nieuwenhuijsen, PhD<sup>1,2,3</sup>  
14

15  
16 6 **Author's affiliations:**

17  
18 7 <sup>1</sup>ISGlobal, Centre for Research in Environmental Epidemiology (CREAL). Barcelona, Spain.

19  
20 8 <sup>2</sup>Universitat Pompeu Fabra (UPF). Barcelona, Spain.

21  
22 9 <sup>3</sup>CIBER Epidemiología y Salud Pública (CIBERESP), Barcelona, Spain.

23  
24 10 <sup>4</sup>Centre for Environmental Policy, Imperial College of London, London, United Kingdom.

25  
26 11 <sup>5</sup>Department of Environmental and Radiological Health Sciences, Colorado State University,  
27  
28 12 Fort Collins, CO, USA

29  
30 13 <sup>6</sup>Physical Activity and Sports Sciences Department, Fundació Blanquerna, Ramon Llull  
31  
32 14 University. Barcelona, Spain.

33  
34 15 <sup>7</sup>Department of Environmental Health Sciences, University of California, Los Angeles,  
35  
36 16 California, United States of America.

37  
38 17 <sup>8</sup>Department of City and Regional Planning, University of California, Berkeley, California,  
39  
40 18 United States of America.

41  
42  
43 19 **Corresponding author information:**

44  
45 20 Ione Avila-Palencia, ISGlobal, Centre for Research in Environmental Epidemiology  
46  
47 21 (CREAL), Doctor Aiguader, 88, 08003 Barcelona, Spain. Telephone (+34) 93 2147337; Fax  
48  
49 22 (+34) 93 2147302; E-mail: [ione.avila@isglobal.org](mailto:ione.avila@isglobal.org)

50  
51  
52 23 **Keywords:** Environmental epidemiology, Physical activity, Stress, Urbanisation, Self-rated  
53  
54 24 health

55  
56 25 **Word count of main text:** 3562  
57  
58  
59  
60

## 1 ABSTRACT

2 **Introduction:** Active commuting –walking and bicycling for travel to and/or from work or  
3 educational addresses– may facilitate daily, routine physical activity. Several studies have  
4 investigated the relationship between active commuting and commuting stress, but there are  
5 no studies examining the relationship between bicycle commuting and perceived stress, or  
6 studies that account for environmental determinants of bicycling commuting and stress. The  
7 current study evaluated the relationship between bicycle use for commuting among working  
8 or studying adults in a dense urban setting and perceived stress.

9 **Methods:** A cross-sectional study was performed with 788 adults who regularly travelled to  
10 work or study locations in Barcelona, Spain, excluding those who only commuted on foot.  
11 Participants responded to a comprehensive telephone survey concerning their travel behaviour  
12 from June 2011 through to May 2012. Participants were categorised as either bicycle  
13 commuters or non-bicycle commuters, and based on the Perceived Stress Scale (PSS-4), as  
14 stressed or non-stressed. Multivariate Poisson regression with robust variance models of stress  
15 status based on bicycling exposure, adjusting for potential confounders, were estimated.

16 **Results:** Bicycle commuters had significantly lower risk of being stressed [RR (95%CI) =  
17 0.73 (0.60, 0.89), p-value=0.001]. Bicycle commuters who bicycled four or more days per  
18 week had lower risk of being stressed than those who bicycled less than four days. This  
19 relationship remained statistically significant after adjusting for individual and environmental  
20 confounders, and when using a different cut-off of perceived stress.

21 **Conclusions:** Stress reduction may be an important consequence of routine bicycle use and  
22 should be considered by decision makers as another potential benefit of its promotion.

1  
2  
3  
4  
5  
6  
7  
8  
9  
10  
11  
12  
13  
14  
15  
16  
17  
18  
19  
20  
21  
22  
23  
24  
25  
26  
27  
28  
29  
30  
31  
32  
33  
34  
35  
36  
37  
38  
39  
40  
41  
42  
43  
44  
45  
46  
47  
48  
49  
50  
51  
52  
53  
54  
55  
56  
57  
58  
59  
60

## 1 **STRENGTHS AND LIMITATIONS OF THIS STUDY**

- 2 • The study had high internal validity, with a good representation of bicycle commuters.
- 3 • The study was conducted in Barcelona (a southern European city), adding evidence in  
4 a different context than the current literature on these issues.
- 5 • The TAPAS Travel Survey sample is representative of Barcelona's population, taking  
6 into account home neighbourhood deprivation and home and work population density.
- 7 • The study used a cross-sectional design, which is not well-suited to assess the  
8 direction of causation.
- 9 • Using questionnaire data we could have misclassification error (information bias) of  
10 bicycle commuting and physical activity because of the data being self-reported.



## 1 INTRODUCTION

2 Walking and bicycling for transport is increasingly being promoted due to its potential for  
3 increasing physical activity (PA) levels in the general population(1–3). Active commuting –  
4 walking and bicycling for travel to and/or from work or educational addresses – has been  
5 associated with multiple health benefits from reductions to cardiovascular risk (4,5), lowering  
6 of body weight(2,5), improvement of fitness, reduced risk of diabetes (3), to higher levels of  
7 physical and mental well-being(6,7). Specifically, bicycle commuting has been inversely  
8 associated with all-cause mortality among both men and women in all age groups(8) and it  
9 seems to be likely to improve the health-related quality of life in previously untrained healthy  
10 adults(9). Active commuting has been shown to have other societal benefits such as helping  
11 reduce air pollution, greenhouse gas emissions, and noise, and improving social  
12 interaction(10).

13  
14 Perceived stress is a global and comprehensive stress construct that refers to the interaction  
15 between the individual and the environment in the presence of a stressor(11). The perception  
16 of an event as stressful can result in a range of physiological, behavioural, and psychological  
17 changes, and can lead to cardiovascular disease, increased negative affect, lowered self-  
18 esteem, and lowered feelings of control. Hence, it is possible that mental health outcomes  
19 such as anxiety disorders and depression can be manifestations of chronic, perceived  
20 stress(12). Furthermore, others have suggested gender differences in stress-related variables.  
21 Women seem to be more physiologically reactive to social rejection challenges(13), are more  
22 likely to have daily stress, and be more impacted by life events(14).

23  
24 Some literature recognises commuting as a potential source of stress(15); however, active  
25 commuters have been shown to have higher levels of satisfaction, lower stress, higher

1 relaxation and a heightened sense of freedom compared to car drivers(16–18). Recent  
2 qualitative research has suggested that commuting can be perceived as a relaxing or  
3 transitional time between home and work life, which can also be about enjoying pleasant  
4 landscape, nature and wildlife(19). Emerging literature has highlighted the relevance of  
5 positive natural and built environment to increase bicycle commuting and to improve mental  
6 health outcomes. Bicycle lane connectivity, bikeability, separation of bicycling from other  
7 traffic, high population density, short trip distance, proximity of a cycle path, green space and  
8 also walkability have been suggested as determinants of bicycling(20–24). Green space has  
9 also been associated with better self-perceived general health and better mental health(25,26).

10  
11 Several studies have examined the relationship between active commuting and commuting  
12 stress (stress directly related with the act of commuting)(17,18,27,28), but none of them have  
13 studied the relationship between adult bicycle commuters and perceived stress, nor taking into  
14 account environmental determinants. Moreover, most studies of active commuting benefits on  
15 mental health have been conducted in North America or Northwest Europe, where the urban  
16 design tends to be less dense than many parts of the world(6,7,17,28–30). Consequently, a  
17 need exists to understand the relationship between bicycle commuting and perceived stress,  
18 particularly in dense urban environments.

19  
20 The current study aimed to evaluate the relationship between bicycle commuting among the  
21 working or studying adult population and perceived stress in a dense urban setting.

22

## 1 MATERIALS AND METHODS

### 2 Study population

3 This cross-sectional study was based on participants from the Transportation, Air Pollution  
4 and Physical Activities (TAPAS) Travel Survey. TAPAS is a relatively large study aimed at  
5 investigating the risks and benefits of active commuting. Participant recruitment was  
6 conducted by trained interviewers on the streets of Barcelona city between June 2011 and  
7 May 2012. To ensure adequate geographic coverage, a total of 40 random points (four random  
8 points within each of the ten city districts across Barcelona) were sampled. Adult bicycle  
9 commuters and non-bicycle commuters were asked in the street to answer a few screening  
10 questions, and those who fulfilled the inclusion criteria (being older than 18 years of age;  
11 living in Barcelona city since 2006 or earlier; working or going to school in Barcelona city;  
12 being healthy enough to ride a bicycle for 20 minutes; having a commute distance greater than  
13 a 10-minute walk; and using at least one mode of transport other than walking to commute)  
14 were invited to respond to a telephone survey. Bicycle commuters were oversampled to  
15 ensure enough bicycle commuters in the study. Those solely commuting on foot were  
16 excluded as the main interest was in the contrast between motorized modes (private and  
17 public transportation) and the bicycle. Of the 18469 participants approached across the forty  
18 sampling random points, 6701 agreed to answer screening questions. Of these, 1508 met the  
19 inclusion criteria, and 871 participants completed the survey. After survey responses were  
20 checked by the research team, 815 still fulfilled the inclusion criteria and 789 had geocodable  
21 home address. After excluding one PA outlier (total of all walking, moderate and vigorous  
22 time variables >960 minutes/day), 788 participants remained. Further details on the  
23 recruitment is given elsewhere(31).

1  
2  
3 1 The study protocol was approved by the Clinical Research Ethical Committee of the Parc de  
4  
5 2 Salut Mar (CEIC-Parc de Salut Mar), and written informed consent was obtained from all  
6  
7 3 participants.  
8  
9 4

## 11 5 **Bicycle commuting**

13  
14 6 The TAPAS Travel Survey assessed the regular use of transport modes(32) and the bicycle  
15  
16 7 use(33). Participants who indicated using a bicycle (private or from public bicycle sharing  
17  
18 8 system) to go to work or school at least once the week prior to survey administration were  
19  
20 9 classified as “bicycle commuters”. Participants who did not commute by bicycle in the week  
21  
22 10 prior to survey administration were classified as “non-bicycle commuters”.  
23  
24 11

25  
26  
27 12 As part of the sensitivity analyses, commuting behaviour was further classified according to  
28  
29 13 bicycle commuting levels and bicycle commuting propensity(24). Bicycle commuting levels  
30  
31 14 classification was based on the days of bicycle commuting in the week prior to survey  
32  
33 15 administration: “low” being three days or fewer, “medium” for four days, and “high” for five  
34  
35 16 or more days. This measure could be interpreted as a proxy of bicycle commuting frequency.  
36  
37 17 Bicycle commuting propensity classification took into account both frequency and  
38  
39 18 willingness to commute by bicycle: the “bicycle commuters” were further classified as  
40  
41 19 “frequent” (four or more days) or “infrequent” (three or less days), and the “non-bicycle  
42  
43 20 commuters” were classified as “willing” or “unwilling”. The “willing” group were those  
44  
45 21 “non-bicycle commuters” who indicated bicycling as “never or nearly never” their general  
46  
47 22 transport mode, but who also indicated that they would consider bicycle commuting in  
48  
49 23 Barcelona (they answered positively to “considering costs, travelling time, comfort and  
50  
51 24 safety, how ready would you be to use the bicycle/Bicing (public bicycle-sharing system) for  
52  
53 25 your trip to work or education centre?”). The “unwilling” group were those “non-bicycle  
54  
55  
56  
57  
58  
59  
60

1 commuters” who indicated “never or nearly never” bicycling for travel and indicated that they  
2 would not consider bicycle commuting in Barcelona by answering negatively to the above  
3 question. More details of the bicycle commuting propensity classification are given  
4 elsewhere(24). This measure was included in the analysis to assess the effect of being willing  
5 to commute by bicycle in perceived stress.

### 7 **Perceived stress**

8 The last four questions of the TAPAS Travel Survey were the short version of Perceived  
9 Stress Scale (PSS-4)(11), which is a well-validated psychological instrument to measure the  
10 degree to which situations in one’s life over the past month are appraised as stressful. The  
11 instrument contains four statements, which measure how unpredictable, uncontrollable, and  
12 overloaded respondents feel that their lives are (Table S1). The higher the score on the PSS-4  
13 (from 0 to 16), the greater the respondent perceives that their demands exceed their ability to  
14 cope. There are no cut-off scores. Instead, an individual’s score is compared to a normative  
15 value(34). In the TAPAS Travel Survey the 5-point Likert scale was modified to a 4-point  
16 Likert scale, removing the midpoint option for consistency with other questions in the survey,  
17 as all other questions used a 4-point Likert scale. The sample did not have high levels of  
18 perceived stress (Table S2); therefore, for an easier interpretation, participants with a PSS-4  
19 score higher than 3 (median of the total sample) were classified as “stressed”, and those equal  
20 or lower than 3 were classified as “non-stressed”. The sensitivity of our results to this choice  
21 was examined further in sensitivity analyses by classifying the respondents with PSS-4 scores  
22 in the 75<sup>th</sup> percentile (P75) and above (a score higher than 4) and in the 90<sup>th</sup> percentile (P90)  
23 and above (a score of 6 and above) as stressed and all others as non-stressed.

## 1 **Other explanatory measures**

2 Individual determinants of bicycle commuting and perceived stress such as physical activity  
3 levels(35), socio-demographic variables, and work or school addresses were also derived from  
4 the TAPAS Travel Survey to be used as potential confounders. In addition, the MEDEA  
5 Index (Mortalidad en áreas pequeñas Españolas y Desigualdades socioEconómicas y  
6 Ambientales, in Spanish; Environmental and socioEconomic Inequalities in Mortality in small  
7 Spanish areas, translated to English) was used as an area deprivation indicator assigned to  
8 each participants' address. MEDEA measures deprivation at the census tract level based on  
9 five domains including percentage of manual workers, temporary workers, total population  
10 with low education, young population with low education, and unemployment(36).

11  
12 Environmental determinants of bicycle commuting and perceived stress within a 400m buffer  
13 surrounding home and work/study addresses, and a Route-By-Area (RBA) surrounding  
14 predicted commute routes, were calculated to be used as potential confounders too. The  
15 number of public bicycle stations within a 400m buffer surrounding home and work/study  
16 addresses was calculated based on information from the Ajuntament de Barcelona -  
17 Informació de Base i Cartografia (IBC) (Barcelona City Council – Basic information and  
18 mapping). Greenness was calculated as a mean in Normalized Difference Vegetation Index  
19 (NDVI) via satellite imagery (LANDSAT 4 and 5, NASA). Mean NO<sub>2</sub> levels were estimated  
20 using a land-use regression model developed for a previous project(37). Noise was calculated  
21 as the proportion of street length above a 55 dB(A) threshold(38). A bikeability index was  
22 calculated taking into account five factors shown to influence bicycling: bicycle facility  
23 availability, bicycle facility quality, street connectivity, topography, and land use(39).  
24 Commute distance did not use buffers and it was calculated in km following the street

1 network of the shortest route from home address to work address. Further details of the  
2 environmental determinants calculation are given elsewhere(24).

#### 4 **Statistical analyses**

5 A Generalized Additive Model (GAM) was used to test linearity between perceived stress and  
6 total physical activity (Total PA), moderate-to-vigorous physical activity (MVPA), vigorous  
7 physical activity (VPA), and age(40). As there was no statistical evidence to reject linearity  
8 between perceived stress and Total PA (p-value = 0.3816), MVPA (p-value = 0.5025), VPA  
9 (p-value = 0.1630), and age (p-value = 0.2282), these variables were included as continuous  
10 variables in the model assuming a linear relationship. Multivariate Poisson regression with  
11 robust variance models were used to assess the relationship between bicycle commuting and  
12 perceived stress. Possible mediation by different levels of PA between bicycle commuting and  
13 perceived stress, and any interaction between gender and bicycle commuting were also tested  
14 with Poisson regression with robust variance models. All regression models were conducted  
15 with a complete case analysis and included individual and environmental potential  
16 confounders that showed a p-value <0.05 in the bivariate analysis as well as those found to be  
17 statistically significant within previous literature. The first descriptive statistical analyses were  
18 conducted in Stata version SE 12 (StataCorp LP, Texas USA), while Poisson regression with  
19 robust variance models were conducted in Stata version SE 14 (StataCorp LP, Texas USA).

## 20 **RESULTS**

21 The included sample had an equal distribution of genders and the median age (P25-P75) was  
22 36 (29-43) years (Table 1). The majority of participants were non-stressed (had a stress score  
23 equal or lower than 3), Spanish, possessing university studies completed or equivalent-level  
24 education, living with their family or partner, living with at least 2 employed people and not

1  
2  
3 1 with children (64.34%). Among those living with children, 8.12% had children younger than  
4  
5 2 3 years of age. The sample had positive self-perception of health (with only <1% of  
6  
7 3 participants self-perceiving bad or very bad health), healthy weight according to BMI  
8  
9 4 (71.12%), and generally no chronic disease (92.26%). Bicycle commuters were statistically  
10  
11 5 significant more likely to be non-stressed; younger (35 years); men; have higher levels of PA;  
12  
13 6 possess a university or equivalent-level education; live alone and/or with flat mates with 0-1  
14  
15 7 employed people; have no children; and have better self-perception of health, and healthy  
16  
17 8 weight, but more chronic diseases than non-bicycle commuters. The majority of participants  
18  
19 9 considered that they could release stress when riding a bicycle and that they enjoyed their trip  
20  
21 10 more if they used a bicycle. Bicycle commuters had shorter commutes compared to non-  
22  
23 11 bicycle commuters, and we observed a gradient between commute distance and bicycle  
24  
25 12 commuting levels with shorter distances for those who cycled more frequently. This tendency  
26  
27 13 was also followed by bicycle commuting propensity, with decreasing commute distance from  
28  
29 14 unwilling to bicycle to frequent bicyclists (Table S3). Bicycle commuters also had more  
30  
31 15 public bicycle stations around the home and work/study addresses, lower average greenness  
32  
33 16 around the home address, and higher levels of bikeability at home, work/study address, and  
34  
35 17 on the commute route compared to non-bicycle commuters (Table 1). These environmental  
36  
37 18 determinants stayed statistically significant for bicycle commuting propensity, but not  
38  
39 19 between bicycle commuting levels (Table S3).

40  
41  
42  
43  
44  
45  
46 21 Women, non-Spanish, those living with 0-1 employed people, and those having a chronic  
47  
48 22 disease were more likely to be stressed (Table 2). Participants who had more public bicycle  
49  
50 23 stations around their work/study area and higher levels of bikeability in the work/study  
51  
52 24 address area and on the commute route were less likely to be stressed. There was no  
53  
54 25 statistically significant relationship between commute distance, greenness, NO<sub>2</sub> and noise, and



1  
2  
3 1 perceived stress. The possible mediation of PA was not further explored as there was no  
4  
5 2 statistically significant relationship between levels of PA (Total PA, MVPA and VPA) and  
6  
7 3 perceived stress for the three different classifications of perceived stress (P50, P75, P90) [RR  
8  
9 4 (95% CI): 1.00 (0.99, 1.00), all p-values>0.10] (Table 2, Table S4).  
10  
11  
12  
13  
14  
15  
16  
17  
18  
19  
20  
21  
22  
23  
24  
25  
26  
27  
28  
29  
30  
31  
32  
33  
34  
35  
36  
37  
38  
39  
40  
41  
42  
43  
44  
45  
46  
47  
48  
49  
50  
51  
52  
53  
54  
55  
56  
57  
58  
59  
60

**Table 1.** Descriptive analyses of perceived stress and determinants of participants and according to bicycle commuting status.

| Variables                                                                    | Total sample (788) |               | Bicycle commuting status    |               |                         |               | p-value <sup>a</sup> |
|------------------------------------------------------------------------------|--------------------|---------------|-----------------------------|---------------|-------------------------|---------------|----------------------|
|                                                                              | n                  | %             | Non-bicycle commuters (390) |               | Bicycle commuters (398) |               |                      |
|                                                                              |                    |               | n                           | %             | n                       | %             |                      |
| <b>Outcome</b>                                                               |                    |               |                             |               |                         |               |                      |
| Stressed (median) (Yes)                                                      | 280                | 35.53         | 162                         | 41.97         | 118                     | 30.33         | 0.001                |
| <b>Individual determinants</b>                                               |                    |               |                             |               |                         |               |                      |
| Age (median; P25-P75)                                                        | 36                 | 29-43         | 37                          | 30-45         | 35                      | 29-41         | 0.025                |
| Total PA – min/week (median; P25-P75)                                        | 424.99             | 269.99-700.00 | 374.99                      | 209.99-624.99 | 484.98                  | 329.99-734.99 | <0.001               |
| MVPA – min/week (median; P25-P75)                                            | 197.49             | 72.50-374.99  | 90.00                       | 0-40          | 299.99                  | 159.99-464.99 | <0.001               |
| VPA – min/week (median; P25-P75)                                             | 72.50              | 0-180.00      | 35.00                       | 0-134.99      | 105.00                  | 0-225.00      | <0.001               |
| Gender (Woman)                                                               | 410                | 52.03         | 234                         | 60.00         | 176                     | 44.22         | <0.001               |
| Country of birth (non-Spanish)                                               | 97                 | 12.31         | 41                          | 10.51         | 56                      | 14.11         | 0.125                |
| Working status (Student)                                                     | 104                | 13.20         | 347                         | 87.19         | 51                      | 12.81         | 0.748                |
| Education level (University studies completed or equivalent-level education) | 551                | 69.92         | 247                         | 63.33         | 304                     | 76.38         | <0.001               |
| Living with family/partner                                                   | 635                | 80.58         | 327                         | 83.85         | 308                     | 77.58         | 0.026                |
| Employed people in household (2-5)                                           | 510                | 64.72         | 261                         | 67.27         | 249                     | 62.88         | 0.198                |
| MEDEA index                                                                  |                    |               |                             |               |                         |               | 0.355                |
| 1st tertile (least deprived)                                                 | 263                | 33.38         | 130                         | 33.33         | 133                     | 33.42         |                      |
| 2nd tertile                                                                  | 263                | 33.38         | 122                         | 31.28         | 141                     | 35.43         |                      |
| 3rd tertile (most deprived)                                                  | 262                | 33.25         | 138                         | 35.38         | 124                     | 31.16         |                      |
| Children in household (Yes)                                                  | 279                | 35.41         | 151                         | 38.82         | 128                     | 32.24         | 0.054                |
| Children <3 years in household (Yes)                                         | 64                 | 8.12          | 36                          | 9.25          | 28                      | 7.07          | 0.264                |
| Self-perceived health (Very good/Excellent)                                  | 323                | 40.99         | 140                         | 35.90         | 183                     | 45.98         | 0.004                |
| BMI (Overweight/Obese)                                                       | 212                | 26.9          | 124                         | 31.96         | 88                      | 22.11         | 0.002                |
| Chronic disease (Yes)                                                        | 61                 | 7.74          | 25                          | 6.41          | 36                      | 9.05          | 0.166                |
| Stress releasing (Agreement)                                                 | 658                | 83.50         | 302                         | 79.47         | 356                     | 90.59         | <0.001               |
| Bicycle trip enjoyment (Agreement)                                           | 629                | 79.82         | 249                         | 65.35         | 380                     | 96.20         | <0.001               |
| <b>Environmental determinants</b>                                            |                    |               |                             |               |                         |               |                      |
| Commute distance, estimated (km) (mean;SD)                                   | 3.85               | 2.05          | 4.38                        | 2.25          | 3.35                    | 1.70          | <0.001               |
| <b>Public bicycle stations (mean;SD)</b>                                     |                    |               |                             |               |                         |               |                      |
| Home, count in 400m buffer                                                   | 4.25               | 2.54          | 3.75                        | 2.51          | 4.75                    | 2.47          | <0.001               |
| Work/study, count in 400m buffer                                             | 4.92               | 3.11          | 4.50                        | 3.13          | 5.33                    | 3.04          | <0.001               |
| <b>Greenness, NDVI [IQR, (mean;SD)]</b>                                      |                    |               |                             |               |                         |               |                      |
| Home, average of 400m buffer                                                 | 0.79               | 1.07          | 0.91                        | 1.08          | 0.68                    | 1.06          | <0.001               |
| Work/study, average of 400m buffer                                           | 0.62               | 0.96          | 0.70                        | 1.07          | 0.55                    | 0.83          | 0.086                |
| Commute route, average of RBA                                                | 0.97               | 0.96          | 1.07                        | 1.06          | 0.87                    | 0.85          | 0.062                |
| <b>NO<sub>2</sub> ppb (mean;SD)</b>                                          |                    |               |                             |               |                         |               |                      |
| Home, concentration in 400m buffer                                           | 76.20              | 17.52         | 75.16                       | 17.12         | 77.21                   | 17.87         | 0.058                |
| Work/study, concentration in 400m buffer                                     | 78.43              | 22.51         | 78.56                       | 23.92         | 78.31                   | 21.10         | 0.843                |
| Commute route, concentration in RBA                                          | 84.40              | 16.97         | 84.24                       | 16.82         | 84.55                   | 17.13         | 0.987                |
| <b>Noise, &gt;55dB (%) (mean;SD)</b>                                         |                    |               |                             |               |                         |               |                      |
| Home, proportion in 400m buffer                                              | 78.63              | 11.40         | 78.77                       | 10.99         | 78.50                   | 11.79         | 0.823                |
| Work/study, proportion in 400m buffer                                        | 79.59              | 14.66         | 79.09                       | 14.86         | 80.07                   | 14.46         | 0.369                |
| Commute route, proportion in RBA                                             | 77.40              | 9.04          | 77.51                       | 8.58          | 77.30                   | 9.48          | 0.924                |
| <b>Bikeability (mean;SD)</b>                                                 |                    |               |                             |               |                         |               |                      |
| Home, concentration in 400m buffer                                           | 6.20               | 1.41          | 5.93                        | 1.45          | 6.46                    | 1.31          | <0.001               |
| Work/study, concentration in 400m buffer                                     | 6.56               | 1.39          | 6.31                        | 1.54          | 6.79                    | 1.17          | <0.001               |
| Commute route, concentration in RBA                                          | 6.70               | 1.12          | 6.45                        | 1.20          | 6.94                    | 0.98          | <0.001               |

PA, Physical Activity; MVPA, Moderate-to-Vigorous Physical Activity; VPA, Vigorous Physical Activity; MEDEA, Mortalidad en áreas pequeñas Españolas y Desigualdades socioEconómicas y Ambientales, in Spanish (Environmental and socioEconomic Inequalities in Mortality in small Spanish areas, translated to English); BMI, Body Mass Index; NDVI, Normalized Difference Vegetation Index; RBA, Route-By-Area. Data are n and %, unless otherwise noted. There are missing data in: Perceived stress (13; 1.65%), Total PA (5; 0.63%), Country of birth (1; 0.13%), Living with family/partner (1; 0.13%), Employed people in household (4; 0.51%), Children in household (2; 0.25%), Children <3years old in household (3; 0.38%), BMI (2; 0.25%); Stress releasing (15; 1.90%), Bicycle trip enjoyment (12; 1.52%), Commute distance (20; 2.54%), Greenness (20; 2.54%), NO<sub>2</sub> (20; 2.54%). <sup>a</sup>Chi square test, except for Age, Total PA, MVPA, VPA, and all the Environmental determinants (U Mann Whitney test).

30-00423

**Table 2.** Bivariate analyses showing the relationships between perceived stress (median) and determinants of participants.

| Variable                                                 | Perceived stress  |         |
|----------------------------------------------------------|-------------------|---------|
|                                                          | RR (95% CI)       | p-value |
| <b>Individual determinants</b>                           |                   |         |
| Age                                                      | 1.00 (0.99, 1.01) | 0.502   |
| Total PA - min/week                                      | 1.00 (0.99, 1.00) | 0.669   |
| MVPA - min/week                                          | 1.00 (0.99, 1.00) | 0.114   |
| VPA - min/week                                           | 1.00 (0.99, 1.00) | 0.658   |
| Gender (Woman)                                           | 1.55 (1.27, 1.89) | <0.001  |
| Country of birth (Spain)                                 | 1.34 (1.05, 1.70) | 0.017   |
| Working status (Student)                                 | 1.22 (0.95, 1.56) | 0.115   |
| Education level (University studies completed or Others) | 0.92 (0.75, 1.12) | 0.387   |
| Living with family/partner                               | 0.91 (0.73, 1.15) | 0.439   |
| Employed people in household (2-5)                       | 0.74 (0.62, 0.90) | 0.002   |
| MEDEA index                                              |                   |         |
| 1st tertile (least deprived)                             | 1.00              |         |
| 2nd tertile                                              | 1.08 (0.85, 1.37) | 0.537   |
| 3rd tertile (most deprived)                              | 1.18 (0.94, 1.48) | 0.162   |
| Children in household (Yes)                              | 0.90 (0.74, 1.11) | 0.330   |
| Children <3 years in household (Yes)                     | 0.87 (0.60, 1.27) | 0.475   |
| Self-perceived health (Very good/Excellent)              | 0.87 (0.71, 1.06) | 0.157   |
| BMI (Overweight/Obese)                                   | 0.95 (0.77, 1.18) | 0.669   |
| Chronic disease (Yes)                                    | 1.38 (1.04, 1.83) | 0.024   |
| Stress releasing (Agreement)                             | 0.87 (0.68, 1.11) | 0.273   |
| Bicycle trip enjoyment (Agreement)                       | 0.91 (0.72, 1.14) | 0.425   |
| <b>Environmental determinants</b>                        |                   |         |
| Commute distance, estimated (km)                         | 1.02 (0.97, 1.06) | 0.508   |
| Public bicycle stations                                  |                   |         |
| Home, count in 400m buffer                               | 0.99 (0.95, 1.02) | 0.503   |
| Work/study, count in 400m buffer                         | 0.96 (0.93, 0.99) | 0.024   |
| Greenness, NDVI                                          |                   |         |
| Home, average of 400m buffer                             | 0.94 (0.85, 1.05) | 0.258   |
| Work/study, average of 400m buffer                       | 1.06 (0.96, 1.16) | 0.241   |
| Commute route, average of RBA                            | 0.99 (0.89, 1.09) | 0.838   |
| NO <sub>2</sub> ppb                                      |                   |         |
| Home, concentration in 400m buffer                       | 1.00 (0.99, 1.01) | 0.827   |
| Work/study, concentration in 400m buffer                 | 1.00 (0.99, 1.00) | 0.100   |
| Commute route, concentration in RBA                      | 1.00 (0.99, 1.00) | 0.518   |
| Noise, >55dB                                             |                   |         |
| Home, proportion in 400m buffer                          | 1.00 (0.98, 1.00) | 0.363   |
| Work/study, proportion in 400m buffer                    | 1.01 (0.99, 1.01) | 0.125   |
| Commute route, proportion in RBA                         | 1.00 (0.98, 1.01) | 0.405   |
| Bikeability                                              |                   |         |
| Home, concentration in 400m buffer                       | 1.00 (0.94, 1.07) | 0.931   |
| Work/study, concentration in 400m buffer                 | 0.92 (0.86, 0.98) | 0.009   |
| Commute route, concentration in RBA                      | 0.91 (0.84, 0.98) | 0.018   |

PA, Physical Activity; MVPA, Moderate-to-Vigorous Physical Activity; VPA, Vigorous Physical Activity; MEDEA, Mortalidad en áreas pequeñas Españolas y Desigualdades socioEconómicas y Ambientales, in Spanish (Environmental and socioEconomic Inequalities in Mortality in small Spanish areas, translated to English); BMI, Body Mass Index; NDVI, Normalized Difference Vegetation Index; RBA, Route-By-Area. Complete case analysis excluding missing data of the variables of final models (Table 3; n=771). The variables that still present missing data and are not included in the final models are: Total PA (5; 0.63%), People living with in household (1; 0.13%), Children in household (2; 0.25%), Children <3years old in household (3; 0.38), BMI (2; 0.25%), Stress releasing (15; 1.90%), Bicycle trip enjoyment (12; 1.52%), Commute distance (20; 2.54%), Greenness (20; 2.54%), NO<sub>2</sub> (20; 2.54%).

1 Multivariate Poisson regression with robust variance analyses showed a statistically  
2 significant inverse relationship between bicycle commuting and perceived stress. Bicycle  
3 commuters had a lower risk of being stressed compared to non-bicycle commuters [RR  
4 (95%CI) = 0.73 (0.60, 0.89), p-value=0.001]. This relationship remained after adjusting for  
5 confounders (individual and environmental) and when using P75 and P90 perceived stress  
6 cut-offs (Table 3, Table S5). There was a statistically significant inverse relationship between  
7 medium and high levels of bicycle commuting and perceived stress using non-bicycle  
8 commuters as a reference group [RR (95%CI) = 0.46 (0.28, 0.78), p-value=0.004; RR  
9 (95%CI) = 0.63 (0.49, 0.81), p-value<0.001] and also when using low levels of bicycle  
10 commuting [RR (95%CI) = 0.42 (0.24, 0.73), p-value=0.002; RR (95%CI) = 0.57 (0.42,  
11 0.77), p-value<0.001] as a reference group. This statistically significant relationship remained  
12 in the majority of sensitivity analyses. Regarding bicycle commuting propensity, there was a  
13 statistically significant inverse relationship between frequent bicycle commuters and  
14 perceived stress, using unwilling non-bicycle commuters [RR (95%CI) = 0.53 (0.41, 0.67), p-  
15 value<0.001] and infrequent bicycle commuters [RR (95%CI) = 0.54 (0.40, 0.72), p-  
16 value<0.001] as respective reference groups. The statistically significant relationship  
17 remained after adjusting for individual and environmental confounders and when using  
18 perceived stress P75 and P90 as cut-offs. Also, there was a statistically significant inverse  
19 relationship between willing non-bicycle commuters and perceived stress, using unwilling  
20 non-bicycle commuters [RR (95%CI) = 0.72 (0.56, 0.94), p-value=0.014] as a reference group  
21 in the bicycle commuting propensity variable and also looking only in the non-bicycle  
22 commuting group [RR (95%CI) = 0.72 (0.56, 0.94), p-value=0.015]. This relationship  
23 remained after adjusting for individual and environmental confounders, but not when using  
24 perceived stress at the P75 and P90 cut-offs.

25

1  
2  
3 1 In the fully adjusted models, we found no statistically significant interactions between gender  
4  
5 2 and bicycle commuters (p-value= 0.165) between gender and bicycle commuting levels (p-  
6  
7 3 value=0.226, p-value=0.266, p-value=0.431), or between gender and bicycle commuting  
8  
9 4 propensity (p-value=0.982, p-value=0.197, p-value=0.277) (results not shown).  
10  
11  
12  
13  
14  
15  
16  
17  
18  
19  
20  
21  
22  
23  
24  
25  
26  
27  
28  
29  
30  
31  
32  
33  
34  
35  
36  
37  
38  
39  
40  
41  
42  
43  
44  
45  
46  
47  
48  
49  
50  
51  
52  
53  
54  
55  
56  
57  
58  
59  
60

1 **Table 3.** Multivariate models showing the relationships between bicycle commuting and perceived stress (median) of participants.

| Variable                                  | Perceived stress          |         |                                      |         |                                      |         |                                      |         |
|-------------------------------------------|---------------------------|---------|--------------------------------------|---------|--------------------------------------|---------|--------------------------------------|---------|
|                                           | RR Unadjusted<br>(95% CI) | p-value | RR Adjusted <sup>a</sup><br>(95% CI) | p-value | RR Adjusted <sup>b</sup><br>(95% CI) | p-value | RR Adjusted <sup>c</sup><br>(95% CI) | p-value |
| <b>All sample (771)</b>                   |                           |         |                                      |         |                                      |         |                                      |         |
| Bicycle commuting status                  |                           |         |                                      |         |                                      |         |                                      |         |
| Non-bicycle commuters                     | 1.00                      |         | 1.00                                 |         | 1.00                                 |         | 1.00                                 |         |
| Bicycle commuters                         | 0.73 (0.60, 0.89)         | 0.001   | 0.75 (0.62, 0.91)                    | 0.003   | 0.77 (0.63, 0.94)                    | 0.009   | 0.80 (0.66, 0.99)                    | 0.036   |
| Bicycle commuting levels                  |                           |         |                                      |         |                                      |         |                                      |         |
| Non-bicycle commuters (0 days)            |                           |         |                                      |         |                                      |         |                                      |         |
| Low bicycle commuting (1-3 days)          | 1.10 (0.87, 1.39)         | 0.436   | 1.11 (0.88, 1.40)                    | 0.369   | 1.13 (0.89, 1.44)                    | 0.297   | 1.17 (0.92, 1.48)                    | 0.205   |
| Medium bicycle commuting (4 days)         | 0.46 (0.28, 0.78)         | 0.004   | 0.45 (0.27, 0.74)                    | 0.002   | 0.45 (0.27, 0.75)                    | 0.002   | 0.48 (0.29, 0.80)                    | 0.005   |
| High bicycle commuting (>=5 days)         | 0.63 (0.49, 0.81)         | <0.001  | 0.66 (0.51, 0.85)                    | 0.001   | 0.68 (0.52, 0.88)                    | 0.003   | 0.71 (0.54, 0.92)                    | 0.010   |
| Bicycle commuting propensity              |                           |         |                                      |         |                                      |         |                                      |         |
| Unwilling Non-bicycle commuters           |                           |         |                                      |         |                                      |         |                                      |         |
| Willing Non-bicycle commuters             | 0.72 (0.56, 0.94)         | 0.014   | 0.75 (0.58, 0.97)                    | 0.029   | 0.74 (0.57, 0.96)                    | 0.022   | 0.75 (0.58, 0.97)                    | 0.031   |
| Infrequent Bicycle commuters              | 0.98 (0.76, 1.25)         | 0.847   | 1.00 (0.78, 1.27)                    | 0.980   | 1.01 (0.79, 1.30)                    | 0.940   | 1.04 (0.81, 1.34)                    | 0.739   |
| Frequent Bicycle commuters                | 0.53 (0.41, 0.67)         | <0.001  | 0.55 (0.43, 0.70)                    | <0.001  | 0.56 (0.43, 0.72)                    | <0.001  | 0.58 (0.45, 0.76)                    | <0.001  |
| <b>Bicycle commuters sample (387)</b>     |                           |         |                                      |         |                                      |         |                                      |         |
| Bicycle commuting levels                  |                           |         |                                      |         |                                      |         |                                      |         |
| Low bicycle commuting (1-3 days)          |                           |         |                                      |         |                                      |         |                                      |         |
| Medium bicycle commuting (4 days)         | 0.42 (0.24, 0.73)         | 0.002   | 0.39 (0.23, 0.67)                    | 0.001   | 0.39 (0.23, 0.65)                    | <0.001  | 0.38 (0.23, 0.65)                    | <0.001  |
| High bicycle commuting (>=5 days)         | 0.57 (0.42, 0.77)         | <0.001  | 0.59 (0.44, 0.80)                    | 0.001   | 0.59 (0.44, 0.80)                    | 0.001   | 0.59 (0.44, 0.80)                    | 0.001   |
| Bicycle commuters propensity              |                           |         |                                      |         |                                      |         |                                      |         |
| Infrequent (1-3 days)                     |                           |         |                                      |         |                                      |         |                                      |         |
| Frequent (>=4 days)                       | 0.54 (0.40, 0.72)         | <0.001  | 0.55 (0.41, 0.73)                    | <0.001  | 0.54 (0.41, 0.72)                    | <0.001  | 0.54 (0.41, 0.72)                    | <0.001  |
| <b>Non-bicycle commuters sample (384)</b> |                           |         |                                      |         |                                      |         |                                      |         |
| Non-bicycle commuters                     |                           |         |                                      |         |                                      |         |                                      |         |
| Unwilling                                 |                           |         |                                      |         |                                      |         |                                      |         |
| Willing                                   | 0.72 (0.56, 0.94)         | 0.015   | 0.73 (0.57, 0.95)                    | 0.020   | 0.72 (0.56, 0.93)                    | 0.013   | 0.74 (0.57, 0.95)                    | 0.020   |

<sup>a</sup>Adjusted by Gender, Country of birth, Employed people in household, Chronic disease. <sup>b</sup>Adjusted by Age, Gender, Country of birth, Employed people in household, Chronic disease, Self-perceived health, Moderate-to-Vigorous Physical Activity (MVPA). <sup>c</sup>Adjusted by Age, Gender, Country of birth, Employed people in household, Chronic disease, Self-perceived health, MVPA, Public bicycle stations at work/study, Bikeability at work/study, Bikeability at commute route.

## 1 **DISCUSSION**

### 2 **Summary of results**

3 We evaluated relationships between bicycle commuting and perceived stress while adjusting  
4 for several confounders in a representative sample of adults in Barcelona, Spain. We found  
5 statistically significant inverse relationships between several measures of bicycle commuting  
6 and perceived stress. Bicycle commuters who bicycled four or more days per week had lower  
7 risk of being stressed compared to those who cycled less or did not bicycle on their commute.  
8 This relationship remained statistically significant in all sensitivity analyses and after  
9 controlling for individual and environmental confounders.

### 11 **Comparison with previous studies**

12 To our knowledge, this study is the first to assess whether a relationship exists between  
13 bicycle commuting and perceived stress. A few studies have focused on the relationship  
14 between active commuting and mental health(6,7,29), but the relationship is still unclear. One  
15 study found a positive association between active commuting and well-being(6), and another  
16 with better mental health in men(29). Moreover, Humphreys(7) found a positive relationship  
17 between time spent actively commuting and levels of physical well-being, but not with mental  
18 well-being. The relationship between physical activity and mental health has been studied  
19 more. It has been suggested that physical activity could reduce stress and anxiety on a daily  
20 basis while improving self-perception and mood(41–43), and it has been associated with  
21 lower depressive symptomatology and greater emotional well-being(44). These findings  
22 suggest that the physical activity gained during bicycle commuting(31) may act as a mediator  
23 in the relationship between bicycle commuting and perceived stress. Our results are consistent  
24 with the general idea that active commuting is associated with better mental health, but in our

1 case physical activity did not act as a mediator in this relationship. Our sample was  
2 composed of young, healthy, and active participants with low levels of perceived stress,  
3 which might have led to an underestimation of the relationship between PA and perceived  
4 stress.

5  
6 Qualitative research suggested that choice of travel mode may affect well-being(19). The  
7 quantity of public bicycle (*Bicing*) stations and the amount of greenness has been related to  
8 bicycle commuting propensity(24), which could imply that commuting by bicycle provides  
9 people with more opportunities to “enjoy” or “experience” greenness than commuting on  
10 public transport or a car. At the same time, the availability of green space close to one’s home  
11 has been shown to be related to better self-perceived general health and better mental  
12 health(25,26,45). Therefore, it seems that perceptual and environmental factors related to  
13 bicycle commuting could affect perceived stress, in the way that more pleasant an  
14 environment to bicycle commute is, better perceived stress results we will get. This general  
15 idea is consistent with our results which show an inverse relationship between perceived  
16 stress and bicycle-friendly environments (public bicycle stations and bikeability levels) in  
17 work/study address area and the commute route. Importantly, the relationship between  
18 bicycling and stress was unchanged after controlling for the environmental confounders. Our  
19 results also showed that general attitude might have a role in this relationship, as we have seen  
20 that those willing non-bicycle commuters, compared to unwilling non-bicycle commuters,  
21 were less stressed. But this remained quite unclear as the relationship becomes statistically no  
22 significant in the sensitivity analyses.



1

## 2 **Limitations and strengths**

3 Our study had some limitations. Firstly, our study used a cross-sectional design, which is not  
4 well-suited to assess the direction of causation, and we cannot exclude reverse causality or  
5 residual confounding. It has been suggested that stressed people can engage in unhealthy  
6 behaviours, such as poor dietary practices or a lack of physical activity(46). This reasoning  
7 could be applied to a behaviour like bicycle commuting, where those individuals who are  
8 more stressed would bicycle less. Secondly, our measurement method may be prone to  
9 information bias. With the questionnaire data we could have random misclassification error of  
10 bicycle commuting and PA because of the data being self-reported. Therefore, the risk  
11 estimate and also the potential mediation by PA could be under-estimated(47). The TAPAS  
12 Travel Survey only measured levels of PA without differentiating between types of PA (work,  
13 travel, recreational). Furthermore, the modification of the 5-point PSS-4 Likert scale into a 4-  
14 point Likert scale could incorrectly-estimate the perceived stress.

15

16 This study had several strengths, too. The study had high internal validity, with a good  
17 representation of bicycle commuters. Related to participants' characteristics, the TAPAS  
18 Travel Survey sample is representative of Barcelona's population from the socio-demographic  
19 point of view. It was compared with data from the Catalan government's Barcelona Active  
20 Population Survey (Statistics and information service, Catalan government 2011) and no  
21 statistically significant differences between participants' deprivation index and home and  
22 work population density in both surveys were found(24,31). Finally, our study in a southern  
23 European city has added evidence in a different context than the current literature on these  
24 issues.

25

## 1 **Future research**

2 Our findings underscored the need for future research. There is a need to obtain a clear  
3 understanding of the relationship between the bicycle commuting and perceived stress in  
4 longitudinal studies. The role of PA in this relationship seems unclear, and it is likely that  
5 other factors could affect the relationship between these two variables, especially those related  
6 to environmental determinants and personal attitudes. Further work related to determinants  
7 and mediators of bicycle commuting and perceived stress is needed.

## 8 **CONCLUSIONS**

9 We found that healthy, adult bicycle commuters had lower risk of being stressed than  
10 commuters of other transport modes. Also, bicycle commuters who bicycled four or more  
11 days per week had lower risk of being stressed than those who bicycled less than that.  
12 Environmental determinants such as the number of public bicycle stations and bikeability, and  
13 also personal attitudes seem to have an influence on this relationship. Further research is  
14 needed in order to disentangle the relationship between bicycle commuting and perceived  
15 stress, and its determinants (individual and environmental) and potential mediators. Our  
16 findings suggest that decision-makers may promote bicycle commuting as a daily routine, to  
17 reduce stress levels and improve public health and well-being.

## 1 **ACKNOWLEDGEMENTS**

2 The authors are grateful to the participants of TAPAS Travel Survey and the CREAL  
3 technicians who recruited them and created geographical variables. We would like to  
4 acknowledge the ESCAPE project and its contributors for air quality and noise model data of  
5 Barcelona, as well as the Ajuntament de Barcelona, Departament de Mobilitat for street map  
6 information.

## 7 **FUNDING**

8 This study was performed as part of the TAPAS project < <http://www.tapas-program.org/> >,  
9 funded by the Coca-Cola Foundation, the Agència de Gestió d'ajuts Universitaris i de Recerca  
10 (AGAUR) and CREAL internal funding. Coca-Cola Foundation provided funding, but had no  
11 role whatsoever in the design of the study or data collection, or interpretation of the results.

## 12 **COMPETING INTERESTS**

13 No conflicts of interest were reported by the authors of this paper.

## 14 **AUTHOR'S CONTRIBUTION**

15 MJN and AdN obtained the funding and designed the study. IAP conducted the analyses and  
16 drafted this version of the paper and received input from all the authors. All authors read and  
17 commented on the paper and agreed with the final version.

## 18 **DATA SHARING**

19 Extra data is available by emailing the corresponding author (Ione Avila-Palencia:  
20 [ione.avila@isglobal.org](mailto:ione.avila@isglobal.org)).

21

## 1 REFERENCES

- 2 1. Faulkner GEJ, Buliung RN, Flora PK, Fusco C. Active school transport, physical  
3 activity levels and body weight of children and youth: A systematic review. *Prev Med.*  
4 Elsevier Inc.; 2009;48(1):3–8.
- 5 2. Wanner M, Götschi T, Martin-Diener E, Kahlmeier S, Martin BW. Active Transport,  
6 Physical Activity, and Body Weight in Adults: A Systematic Review. *Am J Prev Med.*  
7 2012;42(5):493–502.
- 8 3. Saunders LE, Green JM, Petticrew MP, Steinbach R, Roberts H, Morris J, et al. What  
9 Are the Health Benefits of Active Travel? A Systematic Review of Trials and Cohort Studies.  
10 Ruiz JR, editor. *PLoS One.* 2013;8(8):e69912.
- 11 4. Hamer M, Chida Y. Active commuting and cardiovascular risk: A meta-analytic  
12 review. *Prev Med.* 2008;46(1):9–13.
- 13 5. Xu H, Wen LM, Rissel C. The relationships between active transport to work or  
14 school and cardiovascular health or body weight: a systematic review. *Asia Pac J Public*  
15 *Health.* 2013 Jul [cited 2016 Nov 7];25(4):298–315.
- 16 6. Martin A, Goryakin Y, Suhrcke M. Does active commuting improve psychological  
17 wellbeing? Longitudinal evidence from eighteen waves of the British Household Panel  
18 Survey. *Prev Med.* 2014;69:296–303.
- 19 7. Humphreys DK, Goodman A, Ogilvie D. Associations between active commuting and  
20 physical and mental wellbeing. *Prev Med.* 2013;57(2):135–9.
- 21 8. Andersen LB, Schnohr P, Schroll M, Hein HO. All-Cause Mortality Associated With  
22 Physical Activity During Leisure Time, Work, Sports, and Cycling to Work. *Arch Intern*  
23 *Med.* 2000;160(11):1621.

- 1  
2  
3 1 9. de Geus B, Van Hoof E, Aerts I, Meeusen R. Cycling to work: influence on indexes of  
4  
5 2 health in untrained men and women in Flanders. *Coronary heart disease and quality of life.*  
6  
7 3 *Scand J Med Sci Sports.* 2008;18(4):498–510.  
8  
9 4 10. de Nazelle A, Nieuwenhuijsen MJ, Antó JM, Brauer M, Briggs D, Braun-Fahrlander  
10  
11 5 C, et al. Improving health through policies that promote active travel: A review of evidence to  
12  
13 6 support integrated health impact assessment. *Environ Int.* 2011;37(4):766–77.  
14  
15 7 11. Cohen S, Kamarck T, Mermelstein R. A global measure of perceived stress. *J Health*  
16  
17 8 *Soc Behav.* 1983;24(4):385–96.  
18  
19 9 12. Katsarou AL, Triposkiadis F, Panagiotakos D. Perceived stress and vascular disease:  
20  
21 10 where are we now? *Angiology.* 2013;64(7):529–34.  
22  
23 11 13. Stroud LR, Salovey P, Epel ES. Sex differences in stress responses: Social rejection  
24  
25 12 versus achievement stress. *Biol Psychiat.* 2002;52(4):318–27.  
26  
27 13 14. Matud MP. Gender differences in stress and coping styles. *Pers Individ Differ.*  
28  
29 14 2004;37(7):1401–15.  
30  
31 15 15. Koslowsky M. Commuting Stress: Problems of Definition and Variable Identification.  
32  
33 16 *Appl Psychol An-Int Rev.* 1997;46(2):153–73.  
34  
35 17 16. St-Louis E, Manaugh K, van Lierop D, El-Geneidy A. The happy commuter: A  
36  
37 18 comparison of commuter satisfaction across modes. *Transportation research. Part F, Traffic*  
38  
39 19 *psychology and behaviour.* 2014;26:160–70.  
40  
41 20 17. Lajeunesse S, Rodríguez D a. Mindfulness, time affluence, and journey-based affect:  
42  
43 21 Exploring relationships. *ransportation research. Part F, Traffic psychology and behaviour.*  
44  
45 22 2012;15(2):196–205.  
46  
47 23 18. Anable J, Gatersleben B. All work and no play? The role of instrumental and affective  
48  
49 24 factors in work and leisure journeys by different travel modes. *Transportation research. Part*  
50  
51 25 *A, Policy and practice.* 2005;39(2–3):163–81.  
52  
53  
54  
55  
56  
57  
58  
59  
60

- 1  
2  
3 1 19. Guell C, Ogilvie D. Picturing commuting: photovoice and seeking wellbeing in  
4  
5 2 everyday travel. *Qual Res.* 2015;15(2):201-218.  
6  
7 3 20. Titze S, Stronegger WJ, Janschitz S, Oja P. Association of built-environment, social-  
8  
9 4 environment and personal factors with bicycling as a mode of transportation among Austrian  
10  
11 5 city dwellers. *Prev Med.* 2008;47(3):252-9.  
12  
13 6 21. Brown BB, Smith KR, Hanson H, Fan JX, Kowaleski-Jones L, Zick CD.  
14  
15 7 Neighborhood design for walking and biking: physical activity and body mass index. *Am J*  
16  
17 8 *Prev Med;* 2013;44(3):231-8.  
18  
19 9 22. Fraser SDS, Lock K. Cycling for transport and public health: a systematic review of  
20  
21 10 the effect of the environment on cycling. *Eur J Public Health.* 2011;21(6).  
22  
23 11 23. Grasser G, Van Dyck D, Titze S, Stronegger W. Objectively measured walkability and  
24  
25 12 active transport and weight-related outcomes in adults: a systematic review. *Int J Public*  
26  
27 13 *Health;* 2013;58(4):615-25.  
28  
29 14 24. Cole-Hunter T, Donaire-Gonzalez D, Curto a., Ambros a., Valentin a., Garcia-  
30  
31 15 Aymerich J, et al. Objective correlates and determinants of bicycle commuting propensity in  
32  
33 16 an urban environment. *Transportation research. Part D Transport and environment.*  
34  
35 17 2015;40(2):132-43.  
36  
37 18 25. Triguero-Mas M, Dadvand P, Cirach M, Martínez D, Medina A, Mompert A, et al.  
38  
39 19 Natural outdoor environments and mental and physical health: Relationships and  
40  
41 20 mechanisms. *Environ Int.* 2015;77:35-41.  
42  
43 21 26. Dadvand P, Bartoll X, Basagaña X, Dalmau-Bueno A, Martinez D, Ambros A, et al.  
44  
45 22 Green spaces and General Health: Roles of mental health status, social support, and physical  
46  
47 23 activity. *Environ Int.* 2016;91:161-7.  
48  
49 24 27. Olsson LE, Gärling T, Ettema D, Friman M, Fujii S. Happiness and Satisfaction with  
50  
51 25 Work Commute. *Soc Indic Res.* 2013;111(1):255-63.  
52  
53  
54  
55  
56  
57  
58  
59  
60

- 1  
2  
3 1 28. Gottholmseder G, Nowotny K, Pruckner GJ, Theurl E. Stress perception and  
4  
5 2 commuting. *Health Econ.* 2009;18(5):559–76.  
6  
7 3 29. Ohta M, Mizoue T, Mishima N, Ikeda M. Effect of the physical activities in leisure  
8  
9 4 time and commuting to work on mental health. *J Occup Health.* 2007;49(1):46–52.  
10  
11 5 30. Hansson E, Mattisson K, Björk J, Östergren P-O, Jakobsson K. Relationship between  
12  
13 6 commuting and health outcomes in a cross-sectional population survey in southern Sweden.  
14  
15 7 *BMC Public Health.* 2011;11:834.  
16  
17 8 31. Donaire-Gonzalez D, Nazelle A De, Cole-Hunter T, Curto A, Rodriguez D, Mendez  
18  
19 9 M, et al. The Added Benefit of Bicycle Commuting on the Regular Amount of Physical  
20  
21 10 Activity Performed. *Am J Prev Med.* 2015;49(6):842–9.  
22  
23 11 32. Institut d’Estudis Regionals i Metropolitans de Barcelona. La Mobilitat quotidiana a  
24  
25 12 Catalunya. *Papers. Regió Metropolitana de Barcelona* 2008.  
26  
27 13 33. Forsyth A, Krizek KJ, Agrawal AW, Stonebraker E. Reliability testing of the  
28  
29 14 Pedestrian and Bicycling Survey (PABS) method. *J Phys Act Health.* 2012;9(5):677–88.  
30  
31 15 34. Warttig SL, Forshaw MJ, South J, White AK. New, normative, English-sample data  
32  
33 16 for the Short Form Perceived Stress Scale (PSS-4). *J Health Psychol.* 2013;18(12):1617–28.  
34  
35 17 35. Craig CL, Marshall AL, Sjostrom M, Bauman AE, Booth ML, Ainsworth BE.  
36  
37 18 International physical activity questionnaire: 12-country reliability and validity. *Med Sci*  
38  
39 19 *Sport Exerc.* 2003;35(8):1381–95.  
40  
41 20 36. Domínguez-Berjón MF, Borrell C, Cano-Serral G, Esnaola S, Nolasco A, Pasarín MI,  
42  
43 21 et al. [Constructing a deprivation index based on census data in large Spanish cities (the  
44  
45 22 MEDEA project)]. *Gac Sanit.* 2008 Jun;22(3):179–87.  
46  
47 23 37. Beelen R, Hoek G, Vienneau D, Eeftens M, Dimakopoulou K, Pedeli X, et al.  
48  
49 24 Development of NO<sub>2</sub> and NO<sub>x</sub> land use regression models for estimating air pollution  
50  
51  
52  
53  
54  
55  
56  
57  
58  
59  
60

- 1 exposure in 36 study areas in Europe – The ESCAPE project. *Atmospheric Environment*.  
2 2013 Jun;72(2):10–23.
- 3 38. World Health Organisation. *Guideline for Community Noise*. 2011.  
4 <http://www.who.int/docstore/peh/noise/Commnoise4.htm> (accessed 10 April 2015).
- 5 39. Winters M, Brauer M, Setton EM, Teschke K. Mapping bikeability: A spatial tool to  
6 support sustainable travel. *Environ Plan B Plan Des*. 2013;40(5):865–83.
- 7 40. Hastie TJ, Tibshirani R. Generalized additive models. *Stat Sci*. 1990;1(3):297–318.
- 8 41. Fox KR. The influence of physical activity on mental well-being. *Public Health Nutr*.  
9 1999;2(3A):411–8.
- 10 42. Sexton H, Sogaard a. J, Olstad R. How are mood and exercise related? Results from  
11 the Finnmark study. *Soc Psych Psych Epid*. 2001;36(7):348–53.
- 12 43. Peluso MA, Guerra de Andrade LH. Physical activity and mental health: the  
13 association between exercise and mood. *Clinics (Sao Paulo)*. 2005;60(1):61–70.
- 14 44. Galper DI, Trivedi MH, Barlow CE, Dunn AL, Kampert JB. Inverse association  
15 between physical inactivity and mental health in men and women. *Med Sci Sports Exerc*.  
16 2006;38(1):173–8.
- 17 45. Maas J, Verheij RA, Groenewegen PP, De Vries S, Spreeuwenberg P. Green space,  
18 urbanity, and health: how strong is the relation? *J Epidemiol Community Health*.  
19 2006;60(7):587–92.
- 20 46. Stults-Kolehmainen MA, Sinha R. The effects of stress on physical activity and  
21 exercise. *Sports Med*. 2014;44(1):81–121.
- 22 47. Baron RM, Kenny D a. The moderator-mediator variable distinction in social  
23 psychological research: conceptual, strategic, and statistical considerations. *J Pers Soc*  
24 *Psychol*. 1986;51(6):1173–82.
- 25



## SUPPLEMENTARY MATERIAL

**Table S1.** PSS4 questions used in TAPAS Travel Survey

**Q218.** In the last month, how often have you felt that you were unable to control important things in your life?

- 0** *Never*
- 1** *Almost never*
- 2** *Nearly always*
- 3** *Always*
- 997** Don't Know
- 998** Refuse to Answer

**Q219.** In the last month, how often have you felt confident about your ability to handle your personal problems?

- 0** *Never*
- 1** *Almost never*
- 2** *Nearly always*
- 3** *Always*
- 997** Don't Know
- 998** Refuse to Answer

**Q220.** In the last month, how often have you felt that things were going your way?

- 0** *Never*
- 1** *Almost never*
- 2** *Nearly always*
- 3** *Always*
- 997** Don't Know
- 998** Refuse to Answer

**Q221.** In the last month, how often have you felt that difficulties were piling up so high that you could not overcome them?

- 0** *Never*
- 1** *Almost never*
- 2** *Nearly always*
- 3** *Always*
- 997** Don't Know
- 998** Refuse to Answer

**Table S2.** PSS4 score distribution in TAPAS Travel Survey sample

| PSS-4 score | n   | %      | Cumulative % |
|-------------|-----|--------|--------------|
| 0           | 90  | 11.61  | 11.61        |
| 1           | 125 | 16.13  | 27.74        |
| 2           | 129 | 16.65  | 44.39        |
| 3           | 151 | 19.48  | 63.87        |
| 4           | 144 | 18.58  | 82.45        |
| 5           | 38  | 4.90   | 87.35        |
| 6           | 33  | 4.26   | 91.61        |
| 7           | 12  | 1.55   | 93.16        |
| 8           | 28  | 3.61   | 96.77        |
| 9           | 5   | 0.65   | 97.42        |
| 10          | 11  | 1.42   | 98.84        |
| 11          | 3   | 0.39   | 99.23        |
| 12          | 4   | 0.52   | 99.74        |
| 13          | 1   | 0.13   | 99.87        |
| 14          | 1   | 0.13   | 100.00       |
| Total       | 775 | 100.00 |              |

**Table S3.** Description of the individual and environmental determinants in TAPAS sample for Bicycle commuting levels and Bicycle commuting propensity.

| Variables                                                                    | Bicycle commuting levels |               |             |               |            |               |         | Bicycle commuting propensity |               |               |               |                  |               |                |               |         |
|------------------------------------------------------------------------------|--------------------------|---------------|-------------|---------------|------------|---------------|---------|------------------------------|---------------|---------------|---------------|------------------|---------------|----------------|---------------|---------|
|                                                                              | Low (109)                |               | Medium (65) |               | High (224) |               | p-value | Unwilling (230)              |               | Willing (160) |               | Infrequent (109) |               | Frequent (289) |               | p-value |
|                                                                              | n                        | %             | n           | %             | n          | %             |         | n                            | %             | n             | %             | n                | %             | n              | %             |         |
| <b>Outcome</b>                                                               |                          |               |             |               |            |               |         |                              |               |               |               |                  |               |                |               |         |
| Stressed (median)(Yes)                                                       | 49                       | 45.37         | 12          | 19.05         | 57         | 26.15         | <0.001  | 107                          | 46.93         | 55            | 34.81         | 49               | 45.37         | 69             | 24.56         | <0.001  |
| <b>Individual determinants</b>                                               |                          |               |             |               |            |               |         |                              |               |               |               |                  |               |                |               |         |
| Age (median; P25-P75)                                                        | 36                       | 28-42         | 36          | 28-45         | 35         | 29-41         | 0.777   | 37                           | 30-46         | 36            | 29.5-45       | 36               | 28-42         | 35             | 29-41         | 0.111   |
| Total PA – min/week (median; P25-P75)                                        | 494.99                   | 299.99-734.99 | 454.99      | 359.99-689.99 | 484.99     | 339.99-779.99 | 0.567   | 364.99                       | 209.99-600.00 | 404.99        | 209.99-629.99 | 494.99           | 299.99-734.99 | 480.00         | 339.99-744.99 | <0.001  |
| MVPA – min/week (median; P25-P75)                                            | 240.00                   | 134.99-480.00 | 294.99      | 189.99-390.00 | 300.00     | 177.49-479.99 | 0.092   | 90.00                        | 0-244.99      | 90.00         | 0-240.00      | 240.00           | 134.99-480.00 | 300.00         | 179.99-450.00 | <0.001  |
| VPA – min/week (median; P25-P75)                                             | 120.00                   | 0-224.99      | 90.00       | 0-199.99      | 102.50     | 0-240.00      | 0.386   | 45.00                        | 0-150.00      | 0             | 0-127.50      | 120.00           | 0-224.99      | 90.00          | 225.00        | <0.001  |
| Gender (Woman)                                                               | 49                       | 44.95         | 33          | 50.77         | 94         | 41.96         | 0.446   | 151                          | 65.65         | 83            | 51.88         | 49               | 44.95         | 127            | 43.94         | <0.001  |
| Country of birth (non-Spanish)                                               | 19                       | 17.59         | 7           | 10.77         | 30         | 13.39         | 0.412   | 16                           | 6.96          | 25            | 15.63         | 19               | 17.59         | 37             | 12.80         | 0.014   |
| Working status (Student)                                                     | 17                       | 15.60         | 10          | 15.38         | 24         | 10.71         | 0.364   | 24                           | 10.43         | 29            | 18.13         | 17               | 15.60         | 34             | 11.76         | 0.112   |
| Education level (University studies completed or equivalent-level education) | 81                       | 74.31         | 50          | 76.92         | 173        | 77.23         | 0.836   | 161                          | 70.00         | 86            | 53.75         | 81               | 74.31         | 223            | 77.16         | <0.001  |
| Living with family/partner                                                   | 88                       | 80.73         | 48          | 75.00         | 172        | 76.79         | 0.622   | 192                          | 83.48         | 135           | 84.38         | 88               | 80.73         | 220            | 76.39         | 0.114   |
| Employed people in household (2-5)                                           | 69                       | 63.30         | 35          | 55.56         | 145        | 64.73         | 0.410   | 152                          | 66.09         | 109           | 68.99         | 69               | 63.30         | 180            | 62.72         | 0.568   |
| MEDEA index                                                                  |                          |               |             |               |            |               | 0.627   |                              |               |               |               |                  |               |                |               | 0.660   |
| 1st tertile (least deprived)                                                 | 35                       | 32.11         | 23          | 35.38         | 75         | 33.48         |         | 81                           | 35.22         | 49            | 30.63         | 35               | 32.11         | 98             | 33.91         |         |
| 2nd tertile                                                                  | 38                       | 34.86         | 27          | 41.54         | 76         | 33.93         |         | 66                           | 28.70         | 56            | 35.00         | 38               | 34.86         | 103            | 35.64         |         |
| 3rd tertile (most deprived)                                                  | 36                       | 33.03         | 15          | 23.08         | 73         | 32.59         |         | 83                           | 36.09         | 55            | 34.38         | 36               | 33.03         | 88             | 30.45         |         |
| Children in household (Yes)                                                  | 31                       | 28.44         | 18          | 28.13         | 79         | 35.27         | 0.340   | 94                           | 40.87         | 57            | 35.85         | 31               | 28.44         | 97             | 33.68         | 0.128   |
| Children <3 years in household (Yes)                                         | 3                        | 2.75          | 5           | 7.94          | 20         | 8.93          | 0.114   | 20                           | 8.73          | 16            | 10.00         | 3                | 2.75          | 25             | 8.71          | 0.158   |
| Self-perceived health (Very good/Excellent)                                  | 43                       | 39.45         | 27          | 41.54         | 113        | 50.45         | 0.123   | 90                           | 39.13         | 50            | 31.25         | 43               | 39.45         | 140            | 48.44         | 0.004   |
| BMI (Overweight/Obese)                                                       | 25                       | 22.94         | 14          | 21.54         | 49         | 21.88         | 0.969   | 73                           | 31.88         | 51            | 32.08         | 25               | 22.94         | 63             | 21.8          | 0.021   |
| Chronic disease (Yes)                                                        | 11                       | 10.09         | 8           | 12.31         | 17         | 7.59          | 0.458   | 18                           | 7.83          | 7             | 4.38          | 11               | 10.09         | 25             | 8.65          | 0.293   |
| Stress releasing (Agreement)                                                 | 95                       | 87.16         | 62          | 98.41         | 199        | 90.05         | 0.047   | 163                          | 72.44         | 139           | 89.68         | 95               | 87.16         | 261            | 91.90         | <0.001  |
| Bicycle trip enjoyment (Agreement)                                           | 103                      | 94.50         | 65          | 100.00        | 212        | 95.93         | 0.175   | 116                          | 51.79         | 133           | 84.71         | 103              | 94.50         | 277            | 96.85         | <0.001  |
| <b>Environmental determinants</b>                                            |                          |               |             |               |            |               |         |                              |               |               |               |                  |               |                |               |         |
| Commute distance, estimated (km) (mean;SD)                                   | 3.73                     | 1.97          | 3.43        | 1.70          | 3.13       | 1.52          | 0.044   | 4.42                         | 2.35          | 4.32          | 2.11          | 3.73             | 1.97          | 3.20           | 1.56          | <0.001  |
| Public bicycle stations (mean;SD)                                            |                          |               |             |               |            |               |         |                              |               |               |               |                  |               |                |               |         |
| Home, count in 400m buffer                                                   | 4.61                     | 2.61          | 4.97        | 2.63          | 4.75       | 2.35          | 0.492   | 3.77                         | 2.53          | 3.72          | 2.49          | 4.61             | 2.61          | 4.80           | 2.41          | <0.001  |
| Work/study, count in 400m buffer                                             | 4.89                     | 2.96          | 5.89        | 3.11          | 5.39       | 3.05          | 0.124   | 4.36                         | 2.96          | 4.71          | 3.35          | 4.89             | 2.96          | 5.50           | 3.06          | <0.001  |
| Greenness, NDVI (mean;SD)                                                    |                          |               |             |               |            |               |         |                              |               |               |               |                  |               |                |               |         |
| Home, average of 400m buffer                                                 | 0.83                     | 1.30          | 0.75        | 0.98          | 0.59       | 0.94          | 0.635   | 0.90                         | 1.03          | 0.91          | 1.16          | 0.83             | 1.30          | 0.62           | 0.95          | 0.002   |
| Work/study, average of 400m buffer                                           | 0.60                     | 0.82          | 0.37        | 0.57          | 0.58       | 0.90          | 0.136   | 0.68                         | 1.11          | 0.74          | 1.01          | 0.60             | 0.82          | 0.53           | 0.84          | 0.328   |
| Commute route, average of RBA                                                | 0.95                     | 0.94          | 0.76        | 0.83          | 0.87       | 0.81          | 0.322   | 1.10                         | 1.11          | 1.02          | 0.98          | 0.95             | 0.94          | 0.84           | 0.81          | 0.236   |
| NO <sub>2</sub> ppb (mean;SD)                                                |                          |               |             |               |            |               |         |                              |               |               |               |                  |               |                |               |         |
| Home, concentration in 400m buffer                                           | 74.76                    | 18.70         | 77.24       | 16.14         | 78.40      | 17.90         | 0.186   | 75.59                        | 17.08         | 74.51         | 17.20         | 74.76            | 18.70         | 78.14          | 17.49         | 0.063   |
| Work/study, concentration in 400m buffer                                     | 76.49                    | 21.63         | 83.02       | 18.82         | 77.81      | 21.37         | 0.091   | 78.50                        | 23.84         | 78.64         | 24.11         | 76.49            | 21.63         | 79.00          | 20.90         | 0.727   |
| Commute route, concentration in RBA                                          | 82.86                    | 16.10         | 87.47       | 15.22         | 84.51      | 18.08         | 0.127   | 85.22                        | 17.34         | 82.76         | 15.95         | 82.86            | 16.10         | 85.19          | 17.48         | 0.296   |
| Noise, >55dB (mean;SD)                                                       |                          |               |             |               |            |               |         |                              |               |               |               |                  |               |                |               |         |
| Home, proportion in 400m buffer                                              | 78.73                    | 13.39         | 77.65       | 9.77          | 78.63      | 11.54         | 0.554   | 79.03                        | 11.00         | 78.39         | 11.01         | 78.73            | 13.39         | 78.41          | 11.16         | 0.847   |
| Work/study, proportion in 400m buffer                                        | 81.64                    | 13.60         | 80.04       | 13.80         | 79.32      | 15.04         | 0.468   | 78.46                        | 15.47         | 80.00         | 13.94         | 81.64            | 13.60         | 79.48          | 14.75         | 0.434   |
| Commute route, proportion in RBA                                             | 78.62                    | 9.13          | 75.40       | 9.26          | 77.21      | 9.64          | 0.057   | 77.12                        | 8.43          | 78.08         | 8.78          | 78.62            | 9.13          | 76.80          | 9.57          | 0.160   |
| Bikeability (mean;SD)                                                        |                          |               |             |               |            |               |         |                              |               |               |               |                  |               |                |               |         |
| Home, concentration in 400m buffer                                           | 6.29                     | 1.44          | 6.49        | 1.23          | 6.54       | 1.27          | 0.330   | 5.88                         | 1.45          | 6.00          | 1.45          | 6.29             | 1.44          | 6.53           | 1.26          | <0.001  |
| Work/study, concentration in 400m buffer                                     | 6.82                     | 1.28          | 6.88        | 0.98          | 6.75       | 1.17          | 0.638   | 6.21                         | 1.58          | 6.46          | 1.47          | 6.82             | 1.28          | 6.78           | 1.13          | <0.001  |
| Commute route, concentration in RBA                                          | 6.77                     | 1.10          | 7.02        | 0.93          | 6.99       | 0.93          | 0.236   | 6.36                         | 1.22          | 6.58          | 1.16          | 6.77             | 1.10          | 7.00           | 0.93          | <0.001  |

PA, Physical Activity; MVPA, Moderate-to-Vigorous Physical Activity; VPA, Vigorous Physical Activity; MEDEA, Mortalidad en áreas pequeñas Españolas y Desigualdades socioEconómicas y Ambientales, in Spanish (Environmental and socioEconomic Inequalities in Mortality in small Spanish areas, translated to English); BMI, Body Mass Index; NDVI, Normalized Difference Vegetation Index; RBA, Route-By-Area. Data are n and %, unless otherwise noted. There are missing data in: Perceived stress (13; 1.65%), Total PA (5; 0.63%), Country of birth (1; 0.13%), Living with family/partner (1; 0.13%), Employed people in household (4; 0.51), Children in household (2; 0.25%), Children <3years old in household (3; 0.38), BMI (2; 0.25%); Stress releasing (15; 1.90%), Bicycle trip enjoyment (12; 1.52%), Commute distance (20; 2.54%), Greenness (20; 2.54%), NO<sub>2</sub> (20; 2.54%). \*Chi square test, except for Age, Total PA, MVPA, VPA, and all the Environmental determinants (U Mann Whitney test).

**Table S4.** Sensitivity analyses exploring the relationships between perceived stress (P75, P90) and all covariates.

| Variable                                                                     | Perceived stress (P75) |         | Perceived stress (P90) |         |
|------------------------------------------------------------------------------|------------------------|---------|------------------------|---------|
|                                                                              | RR (95% CI)            | p-value | RR (95% CI)            | p-value |
| <b>Individual determinants</b>                                               |                        |         |                        |         |
| Age                                                                          | 1.00 (0.99, 1.02)      | 0.793   | 1.00 (0.97, 1.02)      | 0.662   |
| Total PA - min/week                                                          | 1.00 (0.99, 1.00)      | 0.113   | 1.00 (0.99, 1.00)      | 0.802   |
| MVPA - min/week                                                              | 1.00 (0.99, 1.00)      | 0.197   | 1.00 (0.99, 1.00)      | 0.701   |
| VPA - min/week                                                               | 1.00 (0.99, 1.00)      | 0.382   | 1.00 (0.99, 1.00)      | 0.743   |
| Gender (Woman)                                                               | 1.41 (1.03, 1.93)      | 0.032   | 1.69 (1.04, 2.76)      | 0.035   |
| Country of birth (non-Spanish)                                               | 1.16 (0.75, 1.78)      | 0.515   | 1.14 (0.58, 2.24)      | 0.695   |
| Working status (Student)                                                     | 1.46 (0.99, 2.14)      | 0.051   | 1.04 (0.53, 2.04)      | 0.904   |
| Education level (University studies completed or equivalent-level education) | 0.78 (0.57, 1.07)      | 0.119   | 0.80 (0.49, 1.30)      | 0.369   |
| Living with family/partner                                                   | 1.00 (0.68, 1.47)      | 0.987   | 0.94 (0.53, 1.68)      | 0.841   |
| Employed people in household (2-5)                                           | 0.67 (0.50, 0.91)      | 0.011   | 0.75 (0.47, 1.20)      | 0.231   |
| MEDEA index                                                                  |                        |         |                        |         |
| 1st tertile (least deprived)                                                 | 1.00                   |         | 1.00                   |         |
| 2nd tertile                                                                  | 1.42 (0.96, 2.11)      | 0.081   | 1.85 (0.99, 3.46)      | 0.054   |
| 3rd tertile (most deprived)                                                  | 1.45 (0.97, 2.14)      | 0.067   | 1.77 (0.94, 3.33)      | 0.076   |
| Children in household (Yes)                                                  | 1.05 (0.76, 1.44)      | 0.778   | 0.92 (0.56, 1.51)      | 0.743   |
| Children <3 years in household (Yes)                                         | 0.61 (0.30, 1.25)      | 0.180   | 0.54 (0.17, 1.68)      | 0.289   |
| Self-perceived health (Very good/Excellent)                                  | 0.65 (0.47, 0.91)      | 0.011   | 0.88 (0.55, 1.42)      | 0.604   |
| BMI (Overweight/Obese)                                                       | 1.08 (0.77, 1.51)      | 0.664   | 1.03 (0.61, 1.73)      | 0.922   |
| Chronic disease (Yes)                                                        | 1.58 (1.01, 2.48)      | 0.047   | 1.66 (0.83, 3.32)      | 0.150   |
| Stress releasing (Agreement)                                                 | 0.85 (0.57, 1.27)      | 0.423   | 0.94 (0.49, 1.79)      | 0.850   |
| Bicycle trip enjoyment (Agreement)                                           | 0.74 (0.52, 1.04)      | 0.085   | 0.79 (0.46, 1.37)      | 0.409   |
| <b>Environmental determinants</b>                                            |                        |         |                        |         |
| Commute distance, estimated (km)                                             | 1.07 (0.99, 1.14)      | 0.053   | 1.03 (0.92, 1.15)      | 0.620   |
| Public bicycle stations                                                      |                        |         |                        |         |
| Home, count in 400m buffer                                                   | 0.99 (0.93, 1.06)      | 0.770   | 0.94 (0.84, 1.04)      | 0.253   |
| Work/study, count in 400m buffer                                             | 0.96 (0.91, 1.01)      | 0.103   | 0.96 (0.89, 1.03)      | 0.242   |
| Greenness, NDVI                                                              |                        |         |                        |         |
| Home, average of 400m buffer                                                 | 0.95 (0.79, 1.14)      | 0.557   | 1.04 (0.81, 1.33)      | 0.768   |
| Work/study, average of 400m buffer                                           | 1.09 (0.94, 1.27)      | 0.262   | 0.99 (0.74, 1.32)      | 0.936   |
| Commute route, average of RBA                                                | 1.04 (0.88, 1.22)      | 0.655   | 1.18 (0.95, 1.47)      | 0.138   |
| NO <sub>2</sub> , ppb                                                        |                        |         |                        |         |
| Home, concentration in 400m buffer                                           | 1.00 (0.99, 1.00)      | 0.390   | 1.00 (0.98, 1.01)      | 0.728   |
| Work/study, concentration in 400m buffer                                     | 0.99 (0.99, 1.00)      | 0.042   | 0.99 (0.98, 1.00)      | 0.076   |
| Commute route, concentration in RBA                                          | 1.00 (0.99, 1.01)      | 0.474   | 0.99 (0.97, 1.00)      | 0.138   |
| Noise, >55dB                                                                 |                        |         |                        |         |
| Home, proportion in 400m buffer                                              | 1.01 (0.99, 1.02)      | 0.483   | 1.00 (0.98, 1.03)      | 0.845   |
| Work/study, proportion in 400m buffer                                        | 1.00 (0.99, 1.01)      | 0.549   | 1.00 (0.98, 1.02)      | 0.835   |
| Commute route, proportion in RBA                                             | 1.00 (0.98, 1.01)      | 0.854   | 1.01 (0.98, 1.04)      | 0.444   |
| Bikeability                                                                  |                        |         |                        |         |
| Home, concentration in 400m buffer                                           | 0.97 (0.87, 1.08)      | 0.532   | 0.92 (0.78, 1.09)      | 0.356   |
| Work/study, concentration in 400m buffer                                     | 0.92 (0.82, 1.02)      | 0.108   | 0.89 (0.75, 1.07)      | 0.216   |
| Commute route, concentration in RBA                                          | 0.88 (0.77, 1.00)      | 0.055   | 0.81 (0.66, 0.99)      | 0.042   |

PA, Physical Activity; MVPA, Moderate-to-Vigorous Physical Activity; VPA, Vigorous Physical Activity; MEDEA, Mortalidad en áreas pequeñas Españolas y Desigualdades socioEconómicas y Ambientales, in Spanish (Environmental and socioEconomic Inequalities in Mortality in small Spanish areas, translated to English); BMI, Body Mass Index; NDVI, Normalized Difference Vegetation Index; RBA, Route-By-Area. Complete case analysis excluding missing data of the variables of final models (Table S5; n=771). The variables that still present missing data and are not included in the final models are: Total PA (5; 0.63%), People living with in household (1; 0.13%), Children in household (2; 0.25%), Children <3years old in household (3; 0.38), BMI (2; 0.25%); Stress releasing (15; 1.90%), Bicycle trip enjoyment (12; 1.52%), Commute distance (20; 2.54%), Greenness (20; 2.54%), NO<sub>2</sub> (20; 2.54%).

**Table S5.** Sensitivity analyses exploring the relationships between bicycle commuting (Bicycle commuting status, Bicycle commuting levels, Bicycle commuting propensity) and perceived stress (P75, P90).

| Variable                                           | Perceived stress (P75) |         |                                   |         |                                   |         | Perceived stress (P90) |         |                                   |         |                                   |         |                                   |         |
|----------------------------------------------------|------------------------|---------|-----------------------------------|---------|-----------------------------------|---------|------------------------|---------|-----------------------------------|---------|-----------------------------------|---------|-----------------------------------|---------|
|                                                    | RR Unadjusted (95% CI) | p-value | RR Adjusted <sup>a</sup> (95% CI) | p-value | RR Adjusted <sup>b</sup> (95% CI) | p-value | RR Unadjusted (95% CI) | p-value | RR Adjusted <sup>a</sup> (95% CI) | p-value | RR Adjusted <sup>b</sup> (95% CI) | p-value | RR Adjusted <sup>c</sup> (95% CI) | p-value |
| <b>All sample (771)</b>                            |                        |         |                                   |         |                                   |         |                        |         |                                   |         |                                   |         |                                   |         |
| Bicycle commuting status                           | 1.00                   |         | 1.00                              |         | 1.00                              |         | 1.00                   |         | 1.00                              |         | 1.00                              |         | 1.00                              |         |
| Non-bicycle commuters                              |                        |         |                                   |         |                                   |         |                        |         |                                   |         |                                   |         |                                   |         |
| Bicycle commuters                                  | 0.58 (0.42, 0.79)      | 0.001   | 0.58 (0.42, 0.79)                 | 0.001   | 0.61 (0.44, 0.85)                 | 0.004   | 0.64 (0.46, 0.90)      | 0.011   | 0.54 (0.33, 0.89)                 | 0.014   | 0.56 (0.34, 0.93)                 | 0.025   | 0.52 (0.31, 0.88)                 | 0.014   |
| Bicycle commuting levels                           | 1.00                   |         | 1.00                              |         | 1.00                              |         | 1.00                   |         | 1.00                              |         | 1.00                              |         | 1.00                              |         |
| Non-bicycle commuters (0 days)                     |                        |         |                                   |         |                                   |         |                        |         |                                   |         |                                   |         |                                   |         |
| Low bicycle commuting (1-3 days)                   | 1.04 (0.71, 1.54)      | 0.832   | 1.03 (0.70, 1.53)                 | 0.868   | 1.08 (0.73, 1.59)                 | 0.708   | 1.10 (0.74, 1.64)      | 0.626   | 1.20 (0.68, 2.11)                 | 0.535   | 1.22 (0.68, 2.21)                 | 0.505   | 1.14 (0.63, 2.07)                 | 0.662   |
| Medium bicycle commuting (4 days)                  | 0.22 (0.07, 0.66)      | 0.007   | 0.20 (0.07, 0.62)                 | 0.005   | 0.21 (0.07, 0.65)                 | 0.007   | 0.22 (0.07, 0.68)      | 0.009   | 0.15 (0.02, 1.05)                 | 0.056   | 0.14 (0.02, 1.00)                 | 0.050   | 0.14 (0.02, 0.95)                 | 0.044   |
| High bicycle commuting (>=5 days)                  | 0.45 (0.29, 0.70)      | <0.001  | 0.46 (0.30, 0.72)                 | 0.001   | 0.50 (0.32, 0.78)                 | 0.003   | 0.52 (0.33, 0.82)      | 0.005   | 0.34 (0.16, 0.70)                 | 0.004   | 0.36 (0.17, 0.75)                 | 0.006   | 0.33 (0.15, 0.69)                 | 0.004   |
| Bicycle commuting propensity                       | 1.00                   |         | 1.00                              |         | 1.00                              |         | 1.00                   |         | 1.00                              |         | 1.00                              |         | 1.00                              |         |
| Unwilling Non-bicycle commuters                    |                        |         |                                   |         |                                   |         |                        |         |                                   |         |                                   |         |                                   |         |
| Willing Non-bicycle commuters                      | 0.71 (0.47, 1.06)      | 0.090   | 0.74 (0.49, 1.10)                 | 0.135   | 0.71 (0.48, 1.06)                 | 0.095   | 0.72 (0.48, 1.08)      | 0.116   | 0.66 (0.35, 1.22)                 | 0.183   | 0.70 (0.38, 1.30)                 | 0.255   | 0.70 (0.37, 1.30)                 | 0.253   |
| Infrequent Bicycle commuters                       | 0.92 (0.61, 1.38)      | 0.684   | 0.92 (0.61, 1.39)                 | 0.695   | 0.94 (0.63, 1.43)                 | 0.788   | 0.97 (0.64, 1.48)      | 0.890   | 1.03 (0.57, 1.87)                 | 0.926   | 1.07 (0.57, 2.01)                 | 0.831   | 1.00 (0.53, 1.88)                 | 0.991   |
| Frequent Bicycle commuters                         | 0.35 (0.23, 0.54)      | <0.001  | 0.36 (0.23, 0.55)                 | <0.001  | 0.38 (0.24, 0.59)                 | <0.001  | 0.40 (0.25, 0.62)      | <0.001  | 0.25 (0.12, 0.52)                 | <0.001  | 0.27 (0.13, 0.56)                 | <0.001  | 0.25 (0.12, 0.52)                 | <0.001  |
| <b>Bicycle commuters sample (387)</b>              |                        |         |                                   |         |                                   |         |                        |         |                                   |         |                                   |         |                                   |         |
| Bicycle commuting levels                           | 1.00                   |         | 1.00                              |         | 1.00                              |         | 1.00                   |         | 1.00                              |         | 1.00                              |         | 1.00                              |         |
| Low bicycle commuting (1-3 days)                   |                        |         |                                   |         |                                   |         |                        |         |                                   |         |                                   |         |                                   |         |
| Medium bicycle commuting (4 days)                  | 0.21 (0.06, 0.66)      | 0.008   | 0.19 (0.06, 0.61)                 | 0.005   | 0.19 (0.06, 0.60)                 | 0.005   | 0.19 (0.06, 0.60)      | 0.004   | 0.12 (0.02, 0.92)                 | 0.041   | 0.11 (0.02, 0.83)                 | 0.032   | 0.11 (0.02, 0.80)                 | 0.028   |
| High bicycle commuting (>=5 days)                  | 0.43 (0.26, 0.73)      | 0.002   | 0.44 (0.26, 0.75)                 | 0.002   | 0.44 (0.26, 0.75)                 | 0.002   | 0.44 (0.26, 0.73)      | 0.002   | 0.28 (0.12, 0.65)                 | 0.003   | 0.28 (0.12, 0.65)                 | 0.003   | 0.27 (0.12, 0.64)                 | 0.003   |
| Bicycle commuters propensity                       | 1.00                   |         | 1.00                              |         | 1.00                              |         | 1.00                   |         | 1.00                              |         | 1.00                              |         | 1.00                              |         |
| Infrequent (1-3 days)                              |                        |         |                                   |         |                                   |         |                        |         |                                   |         |                                   |         |                                   |         |
| Frequent (>=4 days)                                | 0.38 (0.23, 0.64)      | <0.001  | 0.38 (0.23, 0.63)                 | <0.001  | 0.38 (0.23, 0.63)                 | <0.001  | 0.38 (0.23, 0.62)      | <0.001  | 0.25 (0.11, 0.55)                 | 0.001   | 0.24 (0.11, 0.55)                 | 0.001   | 0.24 (0.10, 0.54)                 | 0.001   |
| <b>Exposure Non-bicycle commuters sample (384)</b> |                        |         |                                   |         |                                   |         |                        |         |                                   |         |                                   |         |                                   |         |
| Non-bicycle commuters                              | 1.00                   |         | 1.00                              |         | 1.00                              |         | 1.00                   |         | 1.00                              |         | 1.00                              |         | 1.00                              |         |
| Unwilling                                          |                        |         |                                   |         |                                   |         |                        |         |                                   |         |                                   |         |                                   |         |
| Willing                                            | 0.71 (0.47, 1.06)      | 0.090   | 0.72 (0.48, 1.07)                 | 0.106   | 0.67 (0.45, 1.00)                 | 0.051   | 0.69 (0.46, 1.03)      | 0.068   | 0.66 (0.35, 1.22)                 | 0.183   | 0.68 (0.36, 1.26)                 | 0.222   | 0.68 (0.36, 1.26)                 | 0.221   |

<sup>a</sup>Adjusted by Gender, Country of birth, Employed people in household, Chronic disease. <sup>b</sup>Adjusted by Age, Gender, Country of birth, Employed people in household, Chronic disease, Self-perceived health, Moderate-to-Vigorous Physical Activity (MVPA). <sup>c</sup>Adjusted by Age, Gender, Country of birth, Employed people in household, Chronic disease, Self-perceived health, MVPA, Public bicycle stations at work/study, Bikeability at work/study, Bikeability at commute route.

## STROBE Statement—checklist of items that should be included in reports of observational studies

|                           | Item No | Recommendation                                                                                                                                                                                                                                                                                                                                                                                                                                                         | Reported in page  |
|---------------------------|---------|------------------------------------------------------------------------------------------------------------------------------------------------------------------------------------------------------------------------------------------------------------------------------------------------------------------------------------------------------------------------------------------------------------------------------------------------------------------------|-------------------|
| <b>Title and abstract</b> | 1       | (a) Indicate the study's design with a commonly used term in the title or the abstract                                                                                                                                                                                                                                                                                                                                                                                 | Page 2            |
|                           |         | (b) Provide in the abstract an informative and balanced summary of what was done and what was found                                                                                                                                                                                                                                                                                                                                                                    | Page 2            |
| <b>Introduction</b>       |         |                                                                                                                                                                                                                                                                                                                                                                                                                                                                        |                   |
| Background/rationale      | 2       | Explain the scientific background and rationale for the investigation being reported                                                                                                                                                                                                                                                                                                                                                                                   | Pages 4, 5        |
| Objectives                | 3       | State specific objectives, including any prespecified hypotheses                                                                                                                                                                                                                                                                                                                                                                                                       | Page 5            |
| <b>Methods</b>            |         |                                                                                                                                                                                                                                                                                                                                                                                                                                                                        |                   |
| Study design              | 4       | Present key elements of study design early in the paper                                                                                                                                                                                                                                                                                                                                                                                                                | Page 6            |
| Setting                   | 5       | Describe the setting, locations, and relevant dates, including periods of recruitment, exposure, follow-up, and data collection                                                                                                                                                                                                                                                                                                                                        | Pages 6, 7        |
| Participants              | 6       | (a) <i>Cohort study</i> —Give the eligibility criteria, and the sources and methods of selection of participants. Describe methods of follow-up<br><i>Case-control study</i> —Give the eligibility criteria, and the sources and methods of case ascertainment and control selection. Give the rationale for the choice of cases and controls<br><i>Cross-sectional study</i> —Give the eligibility criteria, and the sources and methods of selection of participants | Pages 6, 7        |
|                           |         | (b) <i>Cohort study</i> —For matched studies, give matching criteria and number of exposed and unexposed<br><i>Case-control study</i> —For matched studies, give matching criteria and the number of controls per case                                                                                                                                                                                                                                                 | -                 |
| Variables                 | 7       | Clearly define all outcomes, exposures, predictors, potential confounders, and effect modifiers. Give diagnostic criteria, if applicable                                                                                                                                                                                                                                                                                                                               | Pages 7, 8, 9, 10 |
| Data sources/measurement  | 8*      | For each variable of interest, give sources of data and details of methods of assessment (measurement). Describe comparability of assessment methods if there is more than one group                                                                                                                                                                                                                                                                                   | Pages 7, 8, 9, 10 |
| Bias                      | 9       | Describe any efforts to address potential sources of bias                                                                                                                                                                                                                                                                                                                                                                                                              | Pages 6, 7        |
| Study size                | 10      | Explain how the study size was arrived at                                                                                                                                                                                                                                                                                                                                                                                                                              | Pages 6, 7        |
| Quantitative variables    | 11      | Explain how quantitative variables were handled in the analyses. If applicable, describe which groupings were chosen and why                                                                                                                                                                                                                                                                                                                                           | Pages 7, 8, 9, 10 |
| Statistical methods       | 12      | (a) Describe all statistical methods, including those used to control for confounding                                                                                                                                                                                                                                                                                                                                                                                  | Page 10           |
|                           |         | (b) Describe any methods used to examine subgroups and interactions                                                                                                                                                                                                                                                                                                                                                                                                    | Page 10           |
|                           |         | (c) Explain how missing data were addressed                                                                                                                                                                                                                                                                                                                                                                                                                            | Page 10           |
|                           |         | (d) <i>Cohort study</i> —If applicable, explain how loss to follow-up was addressed<br><i>Case-control study</i> —If applicable, explain how matching of cases and controls was addressed<br><i>Cross-sectional study</i> —If applicable, describe analytical methods taking account of sampling strategy                                                                                                                                                              | Page 10           |
|                           |         | (e) Describe any sensitivity analyses                                                                                                                                                                                                                                                                                                                                                                                                                                  | Pages 7, 8, 10    |

Continued on next page

| <b>Results</b>           |     |                                                                                                                                                                                                              | <b>Reported in page</b>                 |
|--------------------------|-----|--------------------------------------------------------------------------------------------------------------------------------------------------------------------------------------------------------------|-----------------------------------------|
| Participants             | 13* | (a) Report numbers of individuals at each stage of study—eg numbers potentially eligible, examined for eligibility, confirmed eligible, included in the study, completing follow-up, and analysed            | Page 6                                  |
|                          |     | (b) Give reasons for non-participation at each stage                                                                                                                                                         | Page 6                                  |
|                          |     | (c) Consider use of a flow diagram                                                                                                                                                                           | In previous papers                      |
| Descriptive data         | 14* | (a) Give characteristics of study participants (eg demographic, clinical, social) and information on exposures and potential confounders                                                                     | Pages 10, 11, 12, 13, 14                |
|                          |     | (b) Indicate number of participants with missing data for each variable of interest                                                                                                                          | Pages 6, 13, 14                         |
|                          |     | (c) <i>Cohort study</i> —Summarise follow-up time (eg, average and total amount)                                                                                                                             | -                                       |
| Outcome data             | 15* | <i>Cohort study</i> —Report numbers of outcome events or summary measures over time                                                                                                                          | -                                       |
|                          |     | <i>Case-control study</i> —Report numbers in each exposure category, or summary measures of exposure                                                                                                         | -                                       |
|                          |     | <i>Cross-sectional study</i> —Report numbers of outcome events or summary measures                                                                                                                           | Pages 10, 11, 12, 13, 14                |
| Main results             | 16  | (a) Give unadjusted estimates and, if applicable, confounder-adjusted estimates and their precision (eg, 95% confidence interval). Make clear which confounders were adjusted for and why they were included | Pages 15, 16, 17                        |
|                          |     | (b) Report category boundaries when continuous variables were categorized                                                                                                                                    | Pages 7, 8                              |
|                          |     | (c) If relevant, consider translating estimates of relative risk into absolute risk for a meaningful time period                                                                                             | -                                       |
| Other analyses           | 17  | Report other analyses done—eg analyses of subgroups and interactions, and sensitivity analyses                                                                                                               | Pages 3, 4, 5 of Supplementary material |
| <b>Discussion</b>        |     |                                                                                                                                                                                                              |                                         |
| Key results              | 18  | Summarise key results with reference to study objectives                                                                                                                                                     | Page 18                                 |
| Limitations              | 19  | Discuss limitations of the study, taking into account sources of potential bias or imprecision. Discuss both direction and magnitude of any potential bias                                                   | Page 20                                 |
| Interpretation           | 20  | Give a cautious overall interpretation of results considering objectives, limitations, multiplicity of analyses, results from similar studies, and other relevant evidence                                   | Pages 18, 19, 20, 21                    |
| Generalisability         | 21  | Discuss the generalisability (external validity) of the study results                                                                                                                                        | Pages 20                                |
| <b>Other information</b> |     |                                                                                                                                                                                                              |                                         |
| Funding                  | 22  | Give the source of funding and the role of the funders for the present study and, if applicable, for the original study on which the present article is based                                                | Page 22                                 |

\*Give information separately for cases and controls in case-control studies and, if applicable, for exposed and unexposed groups in cohort and cross-sectional studies.

**Note:** An Explanation and Elaboration article discusses each checklist item and gives methodological background and published examples of transparent reporting. The STROBE checklist is best used in conjunction with this article (freely available on the Web sites of PLoS Medicine at <http://www.plosmedicine.org/>, Annals of Internal Medicine at <http://www.annals.org/>, and Epidemiology at <http://www.epidem.com/>). Information on the STROBE Initiative is available at [www.strobe-statement.org](http://www.strobe-statement.org).

# BMJ Open

## The relationship between bicycle commuting and perceived stress: a cross-sectional study

|                                 |                                                                                                                                                                                                                                                                                                                                                                                                                                                                                                                                                                                                                                                                                                  |
|---------------------------------|--------------------------------------------------------------------------------------------------------------------------------------------------------------------------------------------------------------------------------------------------------------------------------------------------------------------------------------------------------------------------------------------------------------------------------------------------------------------------------------------------------------------------------------------------------------------------------------------------------------------------------------------------------------------------------------------------|
| Journal:                        | <i>BMJ Open</i>                                                                                                                                                                                                                                                                                                                                                                                                                                                                                                                                                                                                                                                                                  |
| Manuscript ID                   | bmjopen-2016-013542.R3                                                                                                                                                                                                                                                                                                                                                                                                                                                                                                                                                                                                                                                                           |
| Article Type:                   | Research                                                                                                                                                                                                                                                                                                                                                                                                                                                                                                                                                                                                                                                                                         |
| Date Submitted by the Author:   | 29-Mar-2017                                                                                                                                                                                                                                                                                                                                                                                                                                                                                                                                                                                                                                                                                      |
| Complete List of Authors:       | Avila-Palencia, Ione; ISGlobal, Centre for Research in Environmental Epidemiology (CREAL),<br>de Nazelle, Audrey; Centre for Environmental Policy, Imperial College of London<br>Cole-Hunter, Tom; Colorado State University, Department of Environmental and Radiological Health Sciences<br>Donaire-Gonzalez, David; ISGlobal, Centre for Research in Environmental Epidemiology (CREAL)<br>Jerrett, Michael; University of California Los Angeles, Department of Environmental Health Sciences<br>Rodriguez, Daniel; University of California Berkeley, Department of City and Regional Planning<br>Nieuwenhuijsen, Mark; ISGlobal, Centre for Research in Environmental Epidemiology (CREAL) |
| <b>Primary Subject Heading</b>: | Epidemiology                                                                                                                                                                                                                                                                                                                                                                                                                                                                                                                                                                                                                                                                                     |
| Secondary Subject Heading:      | Mental health, Public health                                                                                                                                                                                                                                                                                                                                                                                                                                                                                                                                                                                                                                                                     |
| Keywords:                       | EPIDEMIOLOGY, MENTAL HEALTH, PUBLIC HEALTH                                                                                                                                                                                                                                                                                                                                                                                                                                                                                                                                                                                                                                                       |
|                                 |                                                                                                                                                                                                                                                                                                                                                                                                                                                                                                                                                                                                                                                                                                  |

SCHOLARONE™  
Manuscripts



1  
2  
3  
4 **1 THE RELATIONSHIP BETWEEN BICYCLE COMMUTING**  
5  
6 **2 AND PERCEIVED STRESS: A CROSS-SECTIONAL STUDY**  
7  
8

9 Ione Avila-Palencia, MPH<sup>1,2,3</sup>; Audrey de Nazelle, PhD<sup>4</sup>; Tom Cole-Hunter, PhD<sup>5</sup>; David  
10  
11 Donaire-Gonzalez, PhD<sup>1,3,6</sup>; Michael Jerrett, PhD<sup>7</sup>; Daniel A. Rodriguez, PhD<sup>8</sup>; Mark J  
12  
13 Nieuwenhuijsen, PhD<sup>1,2,3</sup>  
14

15  
16 **Author's affiliations:**

17  
18 <sup>1</sup>ISGlobal, Centre for Research in Environmental Epidemiology (CREAL). Barcelona, Spain.  
19

20  
21 <sup>2</sup>Universitat Pompeu Fabra (UPF). Barcelona, Spain.

22  
23 <sup>3</sup>CIBER Epidemiología y Salud Pública (CIBERESP), Barcelona, Spain.

24  
25 <sup>4</sup>Centre for Environmental Policy, Imperial College of London, London, United Kingdom.

26  
27 <sup>5</sup>Department of Environmental and Radiological Health Sciences, Colorado State University,  
28  
29 Fort Collins, CO, USA

30  
31 <sup>6</sup>Physical Activity and Sports Sciences Department, Fundació Blanquerna, Ramon Llull  
32  
33 University. Barcelona, Spain.

34  
35  
36 <sup>7</sup>Department of Environmental Health Sciences, University of California, Los Angeles,  
37  
38 California, United States of America.

39  
40 <sup>8</sup>Department of City and Regional Planning, University of California, Berkeley, California,  
41  
42 United States of America.

43  
44  
45 **Corresponding author information:**

46  
47 Ione Avila-Palencia, ISGlobal, Centre for Research in Environmental Epidemiology  
48  
49 (CREAL), Doctor Aiguader, 88, 08003 Barcelona, Spain. Telephone (+34) 93 2147337; Fax  
50  
51 (+34) 93 2147302; E-mail: [ione.avila@isglobal.org](mailto:ione.avila@isglobal.org)  
52

53  
54 **Keywords:** Bicycling, Commuting, Physical activity, Stress, Survey

55  
56 **Word count of main text:** 4243  
57  
58  
59  
60

## 1 ABSTRACT

2 **Introduction:** Active commuting –walking and bicycling for travel to and/or from work or  
3 educational addresses– may facilitate daily, routine physical activity. Several studies have  
4 investigated the relationship between active commuting and commuting stress; however, there  
5 are no studies examining the relationship between solely bicycle commuting and perceived  
6 stress, or studies that account for environmental determinants of bicycling commuting and  
7 stress. The current study evaluated the relationship between bicycle commuting, among  
8 working or studying adults in a dense urban setting, and perceived stress.

9 **Methods:** A cross-sectional study was performed with 788 adults who regularly travelled to  
10 work or study locations (excluding those who only commuted on foot) in Barcelona, Spain.  
11 Participants responded to a comprehensive telephone survey concerning their travel behaviour  
12 from June 2011 through to May 2012. Participants were categorised as either bicycle  
13 commuters or non-bicycle commuters, and (based on the Perceived Stress Scale, PSS-4) as  
14 either stressed or non-stressed. Multivariate Poisson regression with robust variance models  
15 of stress status based on exposures with bicycle commuting were estimated, and adjusted for  
16 potential confounders. **Results:** Bicycle commuters had significantly lower risk of being  
17 stressed than non-bicycle commuters [RR (95%CI) = 0.73 (0.60, 0.89), p-value=0.001].  
18 Bicycle commuters who bicycled four days per week [RR (95%CI) = 0.42 (0.24, 0.73), p-  
19 value=0.002] and those who bicycled five or more days per week [RR (95%CI) = 0.57 (0.42,  
20 0.77), p-value<0.001] had lower risk of being stressed than those who bicycled less than four  
21 days. This relationship remained statistically significant after adjusting for individual and  
22 environmental confounders, and when using different cut-offs of perceived stress.

23 **Conclusions:** Stress reduction may be an important consequence of routine bicycle use and  
24 should be considered by decision makers as another potential benefit of its promotion.

## STRENGTHS AND LIMITATIONS OF THIS STUDY

- The study had high internal validity, with a good representation of bicycle commuters.
- The study was conducted in Barcelona (a dense, Mediterranean/Southern European city), adding evidence on these issues in a different context than the current literature.
- The TAPAS Travel Survey sample is representative of Barcelona's population, taking into account home-neighbourhood deprivation, and home and work-neighbourhood population density.
- The study used a cross-sectional design, which is not well-suited to assess the direction of causation.
- Using questionnaire data, we could have misclassification error (information bias) of bicycle commuting and physical activity due to the data being self-reported.

## 1 INTRODUCTION

2 Walking and bicycling for transport is increasingly being promoted due to its potential for  
3 increasing physical activity (PA) levels in the general population (1–3). Active commuting –  
4 walking and bicycling for travel to and/or from work or educational addresses – has been  
5 associated with multiple health benefits from reductions of cardiovascular risk (4,5), lowering  
6 of body weight (2,5), improvement of fitness, reduction of diabetes risk (3), and increasing  
7 levels of physical and mental well-being (6,7). Specifically, bicycle commuting has been  
8 inversely associated with all-cause mortality among both men and women in all age groups  
9 (8) and it seems likely to improve the health-related quality of life in previously-untrained  
10 healthy adults (9). Active commuting has been shown to have other societal benefits such as  
11 helping reduce air pollution, greenhouse gas emissions, and noise, and improving social  
12 interaction (10).

13  
14 Perceived stress is a global and comprehensive stress construct that refers to the interaction  
15 between the individual and the environment in the presence of a stressor (11). The perception  
16 of an event as being stressful can result in a range of physiological, behavioural, and  
17 psychological changes, and can lead to cardiovascular disease, increased negative affect,  
18 lowered self-esteem, and lowered feelings of control. Hence, it is possible that mental health  
19 outcomes such as anxiety disorders and depression can be manifestations of chronic,  
20 perceived stress (12). Furthermore, others have suggested gender differences in stress-related  
21 variables. Women seem to be more likely to have daily stress, being more physiologically  
22 reactive to social rejection challenges (13), and be more impacted by life events (14).

23  
24 Some literature recognises commuting as a potential source of stress (15); however, active  
25 commuters have been shown to have higher levels of satisfaction, lower stress, higher

1 relaxation and a heightened sense of freedom compared to car drivers (16–18). Recent  
2 qualitative research has suggested that commuting can be perceived as a relaxing or  
3 transitional time between home and work life, which can also be about enjoying pleasant  
4 landscape, nature and wildlife (19). Emerging literature has highlighted the relevance of a  
5 positive natural and built environment to increase bicycle commuting and to improve mental  
6 health outcomes. Bicycle lane connectivity, bikeability, separation of bicycling from other  
7 traffic, high population density, short trip distance, proximity of a cycle path, green space and  
8 also walkability have been suggested as determinants of bicycling (20–24). Green space has  
9 also been associated with better self-perceived general health and better mental health (25,26).

10  
11 Several studies have examined the relationship between active commuting and commuting  
12 stress (stress directly related with the act of commuting) (17,18,27,28), but none of them have  
13 studied the relationship between solely bicycle commuting and perceived stress (global and  
14 comprehensive stress construct) in adults, nor taking into account environmental  
15 determinants. Moreover, most studies of active commuting and its beneficial effects on  
16 mental health have been conducted in North America, where the urban design tends to be less  
17 dense than many parts of the world, or Northwest Europe (6,7,17,28–30). Consequently, a  
18 need exists to understand the relationship between bicycle commuting and perceived stress,  
19 particularly in dense, Mediterranean/Southern European urban environments.

20  
21 The current study aimed to evaluate the relationship between bicycle commuting and  
22 perceived stress among the working or studying adult population of a dense,  
23 Mediterranean/Southern European urban setting.

24

# 1 MATERIALS AND METHODS

## 2 Study population

3 This cross-sectional study was based on participants from the Transportation, Air Pollution  
4 and Physical Activities (TAPAS) Travel Survey. TAPAS is a relatively large study aimed at  
5 investigating the risks and benefits of active commuting. Participant recruitment was  
6 conducted by trained interviewers on the streets of Barcelona city between June 2011 and  
7 May 2012. To ensure adequate geographic coverage, a total of 40 random points (four random  
8 points within each of the ten city districts across Barcelona) were sampled. Adult bicycle  
9 commuters and non-bicycle commuters were asked in the street to answer a few screening  
10 questions, and those who fulfilled the inclusion criteria (being older than 18 years of age;  
11 living in Barcelona city since 2006 or earlier; working or going to school in Barcelona city;  
12 being healthy enough to ride a bicycle for 20 minutes; having a commute distance greater than  
13 a 10-minute walk; and using at least one mode of transport other than walking to commute)  
14 were invited to respond to a telephone survey. Bicycle commuters were oversampled to  
15 ensure enough bicycle commuters in the study. Those solely commuting on foot were  
16 excluded as the main interest was in the contrast between motorized modes (private and  
17 public transportation) and the bicycle. Of the 18469 participants approached across the forty  
18 sampling random points, 6701 agreed to answer screening questions. Of these, 1508 met the  
19 inclusion criteria, and 871 participants completed the survey. After survey responses were  
20 checked by the research team, 815 still fulfilled the inclusion criteria and 789 had geocodable  
21 home address. After excluding one PA outlier (total of all walking, moderate and vigorous  
22 time variables >960 minutes/day), 788 participants remained. Further details on the  
23 recruitment is given elsewhere (31).

1  
2  
3 1 The study protocol was approved by the Clinical Research Ethical Committee of the Parc de  
4  
5 2 Salut Mar (CEIC-Parc de Salut Mar), and written informed consent was obtained from all  
6  
7 3 participants.  
8  
9  
10 4

## 11 **Bicycle commuting**

12  
13  
14 6 The TAPAS Travel Survey assessed the regular use of transport modes (32), including  
15  
16 7 bicycles (33). Participants who indicated using a bicycle (private or from a public bicycle  
17  
18 8 sharing system) to go to work or school at least once the week prior to survey administration  
19  
20 9 were classified as “bicycle commuters”. Participants who did not commute by bicycle in the  
21  
22 10 week prior to survey administration were classified as “non-bicycle commuters”.  
23  
24  
25  
26  
27

28 12 As part of the sensitivity analyses, commuting behaviour was further classified according to  
29  
30 13 bicycle commuting levels and bicycle commuting propensity (24). Classification of bicycle  
31  
32 14 commuting levels was based on the days of bicycle commuting in the week prior to survey  
33  
34 15 administration: “low-level” being three days or fewer, “medium-level” for four days, and  
35  
36 16 “high-level” for five or more days. This measure could be interpreted as a proxy of bicycle  
37  
38 17 commuting frequency. Bicycle commuting propensity classification took into account both  
39  
40 18 frequency and willingness to commute by bicycle: the “bicycle commuters” were further  
41  
42 19 classified as “frequent” (four or more days) or “infrequent” (three or less days), and the “non-  
43  
44 20 bicycle commuters” were classified as “willing” or “unwilling”. The “willing” group were  
45  
46 21 those “non-bicycle commuters” who indicated bicycling as “never or nearly never” their  
47  
48 22 general transport mode, but who also indicated that they would consider bicycle commuting  
49  
50 23 in Barcelona (by answering positively to “considering costs, travelling time, comfort and  
51  
52 24 safety, how ready would you be to use the bicycle/Bicing (public bicycle-sharing system) for  
53  
54 25 your trip to work or education centre?”). The “unwilling” group were those “non-bicycle  
55  
56  
57  
58  
59  
60

1 commuters” who indicated “never or nearly never” bicycling for travel and indicated that they  
2 would not consider bicycle commuting in Barcelona by answering negatively to the above  
3 question. More details of the bicycle commuting propensity classification are given elsewhere  
4 (24). This measure was included in the analysis to assess the effect on perceived stress by  
5 being willing to commute by bicycle.

### 7 **Perceived stress**

8 The last four questions of the TAPAS Travel Survey were the short version of the Perceived  
9 Stress Scale (PSS-4) (11), which is a well-validated psychological instrument to measure the  
10 degree to which situations in one’s life over the past month are appraised as stressful. The  
11 instrument contains four statements, which measure how unpredictable, uncontrollable, and  
12 overloaded respondents feel that their lives are (Table S1). The higher the score on the PSS-4  
13 (from 0 to 16), the greater the respondent perceives that their demands exceed their ability to  
14 cope. There are no cut-off scores. Instead, an individual’s score is compared to a normative  
15 value (34). In the TAPAS Travel Survey the 5-point Likert scale was modified to a 4-point  
16 Likert scale, removing the midpoint option for consistency with other questions in the survey  
17 (using a 4-point Likert scale). The sample did not have high levels of perceived stress (Table  
18 S2); therefore, for an easier interpretation, participants with a PSS-4 score higher than 3  
19 (median of the total sample) were classified as “stressed”, and those equal or lower than 3  
20 were classified as “non-stressed”. The sensitivity of our results to this choice was examined  
21 further in sensitivity analyses by classifying the respondents with PSS-4 scores in the 75<sup>th</sup>  
22 percentile (P75) and above (a score higher than 4) and in the 90<sup>th</sup> percentile (P90) and above  
23 (a score of 6 and above) as stressed and all others as non-stressed.



## 1 **Other explanatory measures**

2 Individual determinants of bicycle commuting and perceived stress such as physical activity  
3 levels (35), socio-demographic variables, and work or school addresses were also derived  
4 from the TAPAS Travel Survey to be used as potential confounders. In addition, the MEDEA  
5 Index (Mortalidad en áreas pequeñas Españolas y Desigualdades socioEconómicas y  
6 Ambientales, in Spanish; Environmental and socioEconomic Inequalities in Mortality in small  
7 Spanish areas, translated to English) was used as an area deprivation indicator assigned to  
8 each participants' address. MEDEA measures deprivation at the census tract level based on  
9 five domains including percentage of manual workers, temporary workers, total population  
10 with low education, young population with low education, and unemployment (36).

11  
12 Environmental determinants of bicycle commuting and perceived stress within a 400m buffer  
13 surrounding home and work/study addresses, and a Route-By-Area (RBA) surrounding  
14 predicted commute routes, were calculated to be used as potential confounders too. The  
15 number of public bicycle stations within a 400m buffer surrounding home and work/study  
16 addresses was calculated based on information from the Ajuntament de Barcelona -  
17 Informació de Base i Cartografia (IBC) (Barcelona City Council – Basic information and  
18 mapping). Greenness was calculated as a mean in Normalized Difference Vegetation Index  
19 (NDVI) via satellite imagery (LANDSAT 4 and 5, NASA). Mean NO<sub>2</sub> levels were estimated  
20 using a land-use regression model developed for a previous project (37). Noise was calculated  
21 as the proportion of street length above a 55 dB(A) threshold (38). A bikeability index was  
22 calculated taking into account five factors shown to influence bicycling: bicycle facility  
23 availability, bicycle facility quality, street connectivity, topography, and land use (39).  
24 Commute distance did not use buffers and it was calculated in km following the street

1 network of the shortest route from home address to work address. Further details of the  
2 environmental determinants calculation are given elsewhere (24).

3

#### 4 **Statistical analyses**

5 Descriptive univariate analyses were done for all study variables. Descriptive bivariate  
6 analyses were done using Chi square and U Mann Whitney tests to assess the relationship  
7 between determinants and bicycle commuting variables (bicycle commuting status, bicycle  
8 commuting levels, and bicycle commuting propensity); and using Poisson regression with  
9 robust variance models to assess the relationship between determinants and perceived stress.  
10 A Generalized Additive Model (GAM) was used to test linearity between perceived stress and  
11 total physical activity (Total PA), moderate-to-vigorous physical activity (MVPA), vigorous  
12 physical activity (VPA), and age (40). As there was no statistical evidence to reject linearity  
13 between perceived stress and Total PA (p-value = 0.382), MVPA (p-value = 0.503), VPA (p-  
14 value = 0.163), and age (p-value = 0.228), these variables were included as continuous  
15 variables in the models assuming a linear relationship. Multivariate Poisson regression with  
16 robust variance models were used to assess the relationship between bicycle commuting and  
17 perceived stress. Four regression models were done: (1) unadjusted; (2) adjusted by individual  
18 determinants that showed a p-value <0.05 in the model; (3) adjusted by the individual  
19 determinants of model 2, as well as those found to be statistically significant within previous  
20 literature; (4) adjusted by the individual determinants of model 3 and environmental  
21 determinants that showed a p-value <0.05 in the bivariate analyses. All multivariate  
22 regression models were conducted with a complete case analysis. Possible mediation by  
23 different levels of PA between bicycle commuting and perceived stress, and any interaction  
24 between gender and bicycle commuting were also tested with Poisson regression with robust  
25 variance models. The first descriptive statistical analyses (univariate, Chi square and U Mann

1 Whitney tests) were conducted in Stata version SE 12 (StataCorp LP, Texas USA), while  
2 Poisson regression with robust variance models were conducted in Stata version SE 14  
3 (StataCorp LP, Texas USA).

## 4 **RESULTS**

5 The included sample had an equal distribution of genders and the median age (P25-P75) was  
6 36 (29-43) years (Table 1). The majority of participants were non-stressed (having a PSS-4  
7 score of 3 or lower), were Spanish, had completed university studies or equivalent-level  
8 education, were living with their family or partner, with at least two employed people, and  
9 were not with children (64.34%). Among those living with children, ~8% had children  
10 younger than three years of age. The sample had positive self-perception of health (with only  
11 <1% of participants self-perceiving bad or very bad health), healthy weight (BMI of 18.5-  
12 24.9: 71.12%), and generally no chronic disease (92.26%). The majority of participants  
13 considered that they could release stress when riding a bicycle and that they enjoyed their trip  
14 more if they used a bicycle. Compared to non-bicycle commuters, bicycle commuters were  
15 statistically significantly (p-value<0.05) more likely to be: non-stressed; younger (35 years);  
16 men; have higher levels of PA; possess a university or equivalent-level education; live alone  
17 and/or with flat mates; live with one or less employed people; live with no children; and have  
18 better self-perception of health, and healthy weight, but more chronic diseases. Bicycle  
19 commuters had shorter commutes compared to non-bicycle commuters, and we observed a  
20 gradient between commute distance and bicycle commuting levels; shorter distances were  
21 travelled for those who bicycle commuted more frequently. This tendency was also seen with  
22 bicycle commuting propensity; shorter distances were travelled for those more willing to  
23 bicycle commute (Table S3). Bicycle commuters also had more public bicycle stations around  
24 the home and work/study addresses, lower average greenness around the home address, and  
25 higher levels of bikeability at home, work/study address, and on the commute route compared

1 to non-bicycle commuters (Table 1). These environmental determinants stayed statistically  
2 significant for bicycle commuting propensity, but not between bicycle commuting levels  
3 (Table S3).

4  
5 Participants more likely to be stressed ( $p$ -value $<0.05$ ) were typically women, non-Spanish,  
6 living with one or less people employed, and had a chronic disease (Table 2). For  
7 environmental determinants, participants who had more public bicycle stations around their  
8 work/study area and higher levels of bikeability in the work/study address area as well as on  
9 the commute route were less likely to be stressed ( $p$  $<0.05$ ). There was no statistically  
10 significant relationship between commute distance, greenness,  $\text{NO}_2$  and noise, and perceived  
11 stress. The possible mediation of PA was not further explored as there was no statistically  
12 significant relationship between levels of PA (Total PA, MVPA and VPA) and perceived  
13 stress for the three different classifications of perceived stress (P50, P75, P90) [RR (95% CI):  
14 1.00 (0.99, 1.00), all  $p$ -values $>0.10$ ] (Table 2, Table S4).

1 **Table 1.** Descriptive analyses of participant perceived stress and its determinants as a total  
 2 sample and according to bicycle commuting status.

| Variables                                                                    | Total sample (788) |               | Bicycle commuting status    |               |                         |               | p-value <sup>a</sup> |
|------------------------------------------------------------------------------|--------------------|---------------|-----------------------------|---------------|-------------------------|---------------|----------------------|
|                                                                              | n                  | %             | Non-bicycle commuters (390) |               | Bicycle commuters (398) |               |                      |
|                                                                              |                    |               | n                           | %             | N                       | %             |                      |
| <b>Outcome</b>                                                               |                    |               |                             |               |                         |               |                      |
| Stressed (median) (Yes)                                                      | 280                | 35.53         | 162                         | 41.97         | 118                     | 30.33         | 0.001                |
| <b>Individual determinants</b>                                               |                    |               |                             |               |                         |               |                      |
| Age (median; P25-P75)                                                        | 36                 | 29-43         | 37                          | 30-45         | 35                      | 29-41         | 0.025                |
| Total PA – min/week (median; P25-P75)                                        | 424.99             | 269.99-700.00 | 374.99                      | 209.99-624.99 | 484.98                  | 329.99-734.99 | <0.001               |
| MVPA – min/week (median; P25-P75)                                            | 197.49             | 72.50-374.99  | 90.00                       | 0-40          | 299.99                  | 159.99-464.99 | <0.001               |
| VPA – min/week (median; P25-P75)                                             | 72.50              | 0-180.00      | 35.00                       | 0-134.99      | 105.00                  | 0-225.00      | <0.001               |
| Gender (Woman)                                                               | 410                | 52.03         | 234                         | 60.00         | 176                     | 44.22         | <0.001               |
| Country of birth (non-Spanish)                                               | 97                 | 12.31         | 41                          | 10.51         | 56                      | 14.11         | 0.125                |
| Working status (Student)                                                     | 104                | 13.20         | 347                         | 87.19         | 51                      | 12.81         | 0.748                |
| Education level (University studies completed or equivalent-level education) | 551                | 69.92         | 247                         | 63.33         | 304                     | 76.38         | <0.001               |
| Living with family/partner                                                   | 635                | 80.58         | 327                         | 83.85         | 308                     | 77.58         | 0.026                |
| Employed people in household (2-5)                                           | 510                | 64.72         | 261                         | 67.27         | 249                     | 62.88         | 0.198                |
| MEDEA index                                                                  |                    |               |                             |               |                         |               | 0.355                |
| 1st tertile (least deprived)                                                 | 263                | 33.38         | 130                         | 33.33         | 133                     | 33.42         |                      |
| 2nd tertile                                                                  | 263                | 33.38         | 122                         | 31.28         | 141                     | 35.43         |                      |
| 3rd tertile (most deprived)                                                  | 262                | 33.25         | 138                         | 35.38         | 124                     | 31.16         |                      |
| Children in household (Yes)                                                  | 279                | 35.41         | 151                         | 38.82         | 128                     | 32.24         | 0.054                |
| Children <3 years in household (Yes)                                         | 64                 | 8.12          | 36                          | 9.25          | 28                      | 7.07          | 0.264                |
| Self-perceived health (Very good/Excellent)                                  | 323                | 40.99         | 140                         | 35.90         | 183                     | 45.98         | 0.004                |
| BMI (Overweight/Obese)                                                       | 212                | 26.9          | 124                         | 31.96         | 88                      | 22.11         | 0.002                |
| Chronic disease (Yes)                                                        | 61                 | 7.74          | 25                          | 6.41          | 36                      | 9.05          | 0.166                |
| Stress releasing (Agreement)                                                 | 658                | 83.50         | 302                         | 79.47         | 356                     | 90.59         | <0.001               |
| Bicycle trip enjoyment (Agreement)                                           | 629                | 79.82         | 249                         | 65.35         | 380                     | 96.20         | <0.001               |
| <b>Environmental determinants</b>                                            |                    |               |                             |               |                         |               |                      |
| Commute distance, estimated (km) (mean;SD)                                   | 3.85               | 2.05          | 4.38                        | 2.25          | 3.35                    | 1.70          | <0.001               |
| Public bicycle stations (mean;SD)                                            |                    |               |                             |               |                         |               |                      |
| Home, count in 400m buffer                                                   | 4.25               | 2.54          | 3.75                        | 2.51          | 4.75                    | 2.47          | <0.001               |
| Work/study, count in 400m buffer                                             | 4.92               | 3.11          | 4.50                        | 3.13          | 5.33                    | 3.04          | <0.001               |
| Greenness, NDVI [IQR, (mean;SD)]                                             |                    |               |                             |               |                         |               |                      |
| Home, average of 400m buffer                                                 | 0.79               | 1.07          | 0.91                        | 1.08          | 0.68                    | 1.06          | <0.001               |
| Work/study, average of 400m buffer                                           | 0.62               | 0.96          | 0.70                        | 1.07          | 0.55                    | 0.83          | 0.086                |
| Commute route, average of RBA                                                | 0.97               | 0.96          | 1.07                        | 1.06          | 0.87                    | 0.85          | 0.062                |
| NO <sub>2</sub> ppb (mean;SD)                                                |                    |               |                             |               |                         |               |                      |
| Home, concentration in 400m buffer                                           | 76.20              | 17.52         | 75.16                       | 17.12         | 77.21                   | 17.87         | 0.058                |
| Work/study, concentration in 400m buffer                                     | 78.43              | 22.51         | 78.56                       | 23.92         | 78.31                   | 21.10         | 0.843                |
| Commute route, concentration in RBA                                          | 84.40              | 16.97         | 84.24                       | 16.82         | 84.55                   | 17.13         | 0.987                |
| Noise, >55dB (%) (mean;SD)                                                   |                    |               |                             |               |                         |               |                      |
| Home, proportion in 400m buffer                                              | 78.63              | 11.40         | 78.77                       | 10.99         | 78.50                   | 11.79         | 0.823                |
| Work/study, proportion in 400m buffer                                        | 79.59              | 14.66         | 79.09                       | 14.86         | 80.07                   | 14.46         | 0.369                |
| Commute route, proportion in RBA                                             | 77.40              | 9.04          | 77.51                       | 8.58          | 77.30                   | 9.48          | 0.924                |
| Bikeability (mean;SD)                                                        |                    |               |                             |               |                         |               |                      |
| Home, concentration in 400m buffer                                           | 6.20               | 1.41          | 5.93                        | 1.45          | 6.46                    | 1.31          | <0.001               |
| Work/study, concentration in 400m buffer                                     | 6.56               | 1.39          | 6.31                        | 1.54          | 6.79                    | 1.17          | <0.001               |
| Commute route, concentration in RBA                                          | 6.70               | 1.12          | 6.45                        | 1.20          | 6.94                    | 0.98          | <0.001               |

PA, Physical Activity; MVPA, Moderate-to-Vigorous Physical Activity; VPA, Vigorous Physical Activity; MEDEA, Mortalidad en áreas pequeñas Españolas y Desigualdades socioEconómicas y Ambientales, in Spanish (Environmental and socioeconomic Inequalities in Mortality in small Spanish areas, translated to English); BMI, Body Mass Index; NDVI, Normalized Difference Vegetation Index; RBA, Route-By-Area. Data are n and %, unless otherwise noted. There are missing data in: Perceived stress (13; 1.65%), Total PA (5; 0.63%), Country of birth (1; 0.13%), Living with family/partner (1; 0.13%), Employed people in household (4; 0.51), Children in household (2; 0.25%), Children <3years old in household (3; 0.38), BMI (2; 0.25%), Stress releasing (15; 1.90%), Bicycle trip enjoyment (12; 1.52%), Commute distance (20; 2.54%), Greenness (20; 2.54%), NO<sub>2</sub> (20; 2.54%). <sup>a</sup>Chi square test, except for Age, Total PA, MVPA, VPA, and all the Environmental determinants (U Mann Whitney test).

1 **Table 2.** Bivariate analyses of the relationship between participant determinants and  
 2 perceived stress.

| Variable                                                 | Perceived stress (median) |         |
|----------------------------------------------------------|---------------------------|---------|
|                                                          | RR (95% CI)               | p-value |
| <b>Individual determinants</b>                           |                           |         |
| Age                                                      | 1.00 (0.99, 1.01)         | 0.502   |
| Total PA - min/week                                      | 1.00 (0.99, 1.00)         | 0.669   |
| MVPA - min/week                                          | 1.00 (0.99, 1.00)         | 0.114   |
| VPA - min/week                                           | 1.00 (0.99, 1.00)         | 0.658   |
| Gender (Woman)                                           | 1.55 (1.27, 1.89)         | <0.001  |
| Country of birth (Spain)                                 | 1.34 (1.05, 1.70)         | 0.017   |
| Working status (Student)                                 | 1.22 (0.95, 1.56)         | 0.115   |
| Education level (University studies completed or Others) | 0.92 (0.75, 1.12)         | 0.387   |
| Living with family/partner                               | 0.91 (0.73, 1.15)         | 0.439   |
| Employed people in household (2-5)                       | 0.74 (0.62, 0.90)         | 0.002   |
| MEDEA index                                              |                           |         |
| 1st tertile (least deprived)                             | 1.00                      |         |
| 2nd tertile                                              | 1.08 (0.85, 1.37)         | 0.537   |
| 3rd tertile (most deprived)                              | 1.18 (0.94, 1.48)         | 0.162   |
| Children in household (Yes)                              | 0.90 (0.74, 1.11)         | 0.330   |
| Children <3 years in household (Yes)                     | 0.87 (0.60, 1.27)         | 0.475   |
| Self-perceived health (Very good/Excellent)              | 0.87 (0.71, 1.06)         | 0.157   |
| BMI (Overweight/Obese)                                   | 0.95 (0.77, 1.18)         | 0.669   |
| Chronic disease (Yes)                                    | 1.38 (1.04, 1.83)         | 0.024   |
| Stress releasing (Agreement)                             | 0.87 (0.68, 1.11)         | 0.273   |
| Bicycle trip enjoyment (Agreement)                       | 0.91 (0.72, 1.14)         | 0.425   |
| <b>Environmental determinants</b>                        |                           |         |
| Commute distance, estimated (km)                         | 1.02 (0.97, 1.06)         | 0.508   |
| Public bicycle stations                                  |                           |         |
| Home, count in 400m buffer                               | 0.99 (0.95, 1.02)         | 0.503   |
| Work/study, count in 400m buffer                         | 0.96 (0.93, 0.99)         | 0.024   |
| Greenness, NDVI                                          |                           |         |
| Home, average of 400m buffer                             | 0.94 (0.85, 1.05)         | 0.258   |
| Work/study, average of 400m buffer                       | 1.06 (0.96, 1.16)         | 0.241   |
| Commute route, average of RBA                            | 0.99 (0.89, 1.09)         | 0.838   |
| NO <sub>2</sub> ppb                                      |                           |         |
| Home, concentration in 400m buffer                       | 1.00 (0.99, 1.01)         | 0.827   |
| Work/study, concentration in 400m buffer                 | 1.00 (0.99, 1.00)         | 0.100   |
| Commute route, concentration in RBA                      | 1.00 (0.99, 1.00)         | 0.518   |
| Noise, >55dB                                             |                           |         |
| Home, proportion in 400m buffer                          | 1.00 (0.98, 1.00)         | 0.363   |
| Work/study, proportion in 400m buffer                    | 1.01 (0.99, 1.01)         | 0.125   |
| Commute route, proportion in RBA                         | 1.00 (0.98, 1.01)         | 0.405   |
| Bikeability                                              |                           |         |
| Home, concentration in 400m buffer                       | 1.00 (0.94, 1.07)         | 0.931   |
| Work/study, concentration in 400m buffer                 | 0.92 (0.86, 0.98)         | 0.009   |
| Commute route, concentration in RBA                      | 0.91 (0.84, 0.98)         | 0.018   |

PA, Physical Activity; MVPA, Moderate-to-Vigorous Physical Activity; VPA, Vigorous Physical Activity; MEDEA, Mortalidad en áreas pequeñas Españolas y Desigualdades socioEconómicas y Ambientales, in Spanish (Environmental and socioEconomic Inequalities in Mortality in small Spanish areas, translated to English); BMI, Body Mass Index; NDVI, Normalized Difference Vegetation Index; RBA, Route-By-Area. Complete case analysis excluding missing data of the variables of final models (Table 3; n=771). The variables that still present missing data and are not included in the final models are: Total PA (5; 0.63%), People living with in household (1; 0.13%), Children in household (2; 0.25%), Children <3years old in household (3; 0.38), BMI (2; 0.25%), Stress releasing (15; 1.90%), Bicycle trip enjoyment (12; 1.52%), Commute distance (20; 2.54%), Greenness (20; 2.54%), NO<sub>2</sub> (20; 2.54%).

1  
2  
3 1 Multivariate Poisson regression with robust variance analyses showed a statistically  
4  
5 2 significant inverse relationship between bicycle commuting and perceived stress. Considering  
6  
7 3 the total sample, bicycle commuters had a lower risk of being stressed compared to non-  
8  
9 4 bicycle commuters [Model 1: RR (95%CI) = 0.73 (0.60, 0.89), p-value=0.001]. This  
10  
11 5 relationship remained statistically significant in the adjusted models [Model 2: RR (95%CI) =  
12  
13 6 0.75 (0.62, 0.91), p-value=0.003; Model 3: RR (95%CI) = 0.77 (0.63, 0.94), p-value=0.009;  
14  
15 7 Model 4: RR (95%CI) = 0.80 (0.66, 0.99), p-value=0.036] (Table 3) and when using  
16  
17 8 perceived stress cut-offs of either P75 or P90 (Table S5). Regarding bicycle commuting levels  
18  
19 9 in the total sample, those who bicycle commuted four days per week (considered “medium-  
20  
21 10 level” of bicycle commuters) and those who bicycled five or more days per week (“high-  
22  
23 11 level”) had lower risk of being stressed than non-bicycle commuters [“Medium-level” –  
24  
25 12 Model 1: RR (95%CI) = 0.46 (0.28, 0.78), p-value=0.004. “High-level” – Model 1: RR  
26  
27 13 (95%CI) = 0.63 (0.49, 0.81), p-value<0.001]. These relationships remained statistically  
28  
29 14 significant in the adjusted models (“Medium-level” - Model 2: RR (95%CI) = 0.45 (0.27,  
30  
31 15 0.74), p-value=0.002; Model 3: RR (95%CI) = 0.45 (0.27, 0.75), p-value=0.002; Model 4: RR  
32  
33 16 (95%CI) = 0.48 (0.29, 0.80), p-value=0.005. “High-level” - Model 2: RR (95%CI) = 0.66  
34  
35 17 (0.51, 0.85), p-value=0.001; Model 3: RR (95%CI) = 0.68 (0.52, 0.88), p-value=0.003; Model  
36  
37 18 4: RR (95%CI) = 0.71 (0.54, 0.92), p-value=0.010) (Table 3) and in the majority of perceived  
38  
39 19 stress sensitivity analyses (using cut-offs of P75 and P90), with the exception of the  
40  
41 20 unadjusted and fully adjusted models (Models 1 and 4) for “medium-level” bicycle  
42  
43 21 commuters using P90 as a perceived stress cut-off [“Medium-level” - Model 1: RR (95%CI) =  
44  
45 22 0.15 (0.02, 1.05), p-value=0.056; Model 4: RR (95%CI) = 0.15 (0.02, 1.04), p-value=0.054]  
46  
47 23 (Table S5). Regarding bicycle commuting propensity in the total sample, “frequent” bicycle  
48  
49 24 commuters had lower risk of being stressed than “unwilling” non-bicycle commuters [Model  
50  
51 25 1: RR (95%CI) = 0.53 (0.41, 0.67), p-value<0.001]. This relationship remained statistically  
52  
53  
54  
55  
56  
57  
58  
59  
60

1 significant in the adjusted models [Model 2: RR (95%CI) = 0.55 (0.43, 0.70), p-value<0.001;  
2 Model 3: RR (95%CI) = 0.56 (0.43, 0.72), p-value<0.001; Model 4: RR (95%CI) = 0.58  
3 (0.45, 0.76), p-value<0.001] (Table 3) and when using perceived stress cut-offs of either P75  
4 or P90 (Table S5). Also, “willing” non-bicycle commuters had lower risk of being stressed  
5 than “unwilling” non-bicycle commuters [Model 1: RR (95%CI) = 0.72 (0.56, 0.94), p-  
6 value=0.014]. This relationship remained statistically significant in the adjusted models  
7 [Model 2: RR (95%CI) = 0.75 (0.58, 0.97), p-value=0.029; Model 3: RR (95%CI) = 0.74  
8 (0.57, 0.96), p-value=0.022; Model 4: RR (95%CI) = 0.75 (0.58, 0.97), p-value=0.031] (Table  
9 3), but not when using perceived stress cut-offs of either P75 or P90 (Table S5).

10  
11 When considering bicycle commuting levels within the bicycle commuters only sample,  
12 “medium-level” and “high-level” bicycle commuters had lower risk of being stressed than  
13 “low-level” bicycle commuters [“Medium-level” - Model 1: RR (95%CI) = 0.42 (0.24, 0.73),  
14 p-value=0.002. “High-level” - Model 1: RR (95%CI) = 0.57 (0.42, 0.77), p-value<0.001].  
15 These relationships remained statistically significant in the adjusted models ([“Medium-level”  
16 - Model 2: RR (95%CI) = 0.39 (0.23, 0.67), p-value=0.001; Model 3: RR (95%CI) = 0.39  
17 (0.23, 0.65), p-value<0.001; Model 4: RR (95%CI) = 0.38 (0.23, 0.65), p-value<0.001.  
18 “High-level” - Model 2: RR (95%CI) = 0.59 (0.44, 0.80), p-value=0.001; Model 3: RR  
19 (95%CI) = 0.59 (0.44, 0.80), p-value=0.001; Model 4: RR (95%CI) = 0.59 (0.44, 0.80), p-  
20 value=0.001] (Table 3) and when using perceived stress cut-offs of either P75 or P90 (Table  
21 S5). Regarding bicycle commuting propensity, “frequent” bicycle commuters had lower risk  
22 of being stressed than “infrequent” bicycle commuters [Model 1: RR (95%CI) = 0.54 (0.40,  
23 0.72), p-value<0.001]. This relationship remained statistically significant in the adjusted  
24 models [Model 2: RR (95%CI) = 0.55 (0.41, 0.73), p-value<0.001; Model 3: RR (95%CI) =



1  
2  
3 1 0.54 (0.41, 0.72), p-value<0.001; Model 4: RR (95%CI) = 0.54 (0.41, 0.72), p-value<0.001]  
4  
5 2 (Table 3) and when using perceived stress cut-offs of either P75 or P90 (Table S5).  
6  
7  
8  
9  
10  
11  
12  
13  
14  
15  
16  
17  
18  
19  
20  
21  
22  
23  
24  
25  
26  
27  
28  
29  
30  
31  
32  
33  
34  
35  
36  
37  
38  
39  
40  
41  
42  
43  
44  
45  
46  
47  
48  
49  
50  
51  
52  
53  
54  
55  
56  
57  
58  
59  
60

4 Considering bicycle commuting propensity within the non-bicycle commuters only sample,  
5 “willing” non-bicycle commuters had lower risk of being stressed than “unwilling” non-  
6 bicycle commuters [Model 1: RR (95%CI) = 0.72 (0.56, 0.94), p-value=0.015]. This  
7 relationship remained statistically significant in the adjusted models [Model 2: RR (95%CI) =  
8 0.73 (0.57, 0.95), p-value=0.020; Model 3: RR (95%CI) = 0.72 (0.56, 0.93), p-value=0.013;  
9 Model 4: RR (95%CI) = 0.74 (0.57, 0.95), p-value=0.020] (Table 3), but not when using  
10 perceived stress cut-offs of either P75 or P90 (Table S5).  
11

12 In the fully adjusted models (Model 4), we found no statistically significant interactions  
13 between gender and being a bicycle commuter (p-value= 0.165), between gender and bicycle  
14 commuting levels (p-value=0.226, p-value=0.266, p-value=0.431), or between gender and  
15 bicycle commuting propensity (p-value=0.982, p-value=0.197, p-value=0.277) (results not  
16 shown).

1 **Table 3.** Multivariate models assessing the relationship between bicycle commuting and participant perceived stress (median).

| Variable                                  | Perceived stress (median)           |         |                                     |         |                                     |         |                                     |         |
|-------------------------------------------|-------------------------------------|---------|-------------------------------------|---------|-------------------------------------|---------|-------------------------------------|---------|
|                                           | Model 1 <sup>a</sup><br>RR (95% CI) | p-value | Model 2 <sup>b</sup><br>RR (95% CI) | p-value | Model 3 <sup>c</sup><br>RR (95% CI) | p-value | Model 4 <sup>d</sup><br>RR (95% CI) | p-value |
| <b>All sample (771)</b>                   |                                     |         |                                     |         |                                     |         |                                     |         |
| Bicycle commuting status                  |                                     |         |                                     |         |                                     |         |                                     |         |
| Non-bicycle commuters                     | 1.00                                |         | 1.00                                |         | 1.00                                |         | 1.00                                |         |
| Bicycle commuters                         | 0.73 (0.60, 0.89)                   | 0.001   | 0.75 (0.62, 0.91)                   | 0.003   | 0.77 (0.63, 0.94)                   | 0.009   | 0.80 (0.66, 0.99)                   | 0.036   |
| Bicycle commuting levels                  |                                     |         |                                     |         |                                     |         |                                     |         |
| Non-bicycle commuters (0 days)            | 1.00                                |         | 1.00                                |         | 1.00                                |         | 1.00                                |         |
| Low-level bicycle commuters (1-3 days)    | 1.10 (0.87, 1.39)                   | 0.436   | 1.11 (0.88, 1.40)                   | 0.369   | 1.13 (0.89, 1.44)                   | 0.297   | 1.17 (0.92, 1.48)                   | 0.205   |
| Medium-level bicycle commuters (4 days)   | 0.46 (0.28, 0.78)                   | 0.004   | 0.45 (0.27, 0.74)                   | 0.002   | 0.45 (0.27, 0.75)                   | 0.002   | 0.48 (0.29, 0.80)                   | 0.005   |
| High-level bicycle commuters (>=5 days)   | 0.63 (0.49, 0.81)                   | <0.001  | 0.66 (0.51, 0.85)                   | 0.001   | 0.68 (0.52, 0.88)                   | 0.003   | 0.71 (0.54, 0.92)                   | 0.010   |
| Bicycle commuting propensity              |                                     |         |                                     |         |                                     |         |                                     |         |
| Unwilling non-bicycle commuters           | 1.00                                |         | 1.00                                |         | 1.00                                |         | 1.00                                |         |
| Willing non-bicycle commuters             | 0.72 (0.56, 0.94)                   | 0.014   | 0.75 (0.58, 0.97)                   | 0.029   | 0.74 (0.57, 0.96)                   | 0.022   | 0.75 (0.58, 0.97)                   | 0.031   |
| Infrequent bicycle commuters              | 0.98 (0.76, 1.25)                   | 0.847   | 1.00 (0.78, 1.27)                   | 0.980   | 1.01 (0.79, 1.30)                   | 0.940   | 1.04 (0.81, 1.34)                   | 0.739   |
| Frequent bicycle commuters                | 0.53 (0.41, 0.67)                   | <0.001  | 0.55 (0.43, 0.70)                   | <0.001  | 0.56 (0.43, 0.72)                   | <0.001  | 0.58 (0.45, 0.76)                   | <0.001  |
| <b>Bicycle commuters sample (387)</b>     |                                     |         |                                     |         |                                     |         |                                     |         |
| Bicycle commuting levels                  |                                     |         |                                     |         |                                     |         |                                     |         |
| Low-level bicycle commuters (1-3 days)    | 1.00                                |         | 1.00                                |         | 1.00                                |         | 1.00                                |         |
| Medium-level bicycle commuters (4 days)   | 0.42 (0.24, 0.73)                   | 0.002   | 0.39 (0.23, 0.67)                   | 0.001   | 0.39 (0.23, 0.65)                   | <0.001  | 0.38 (0.23, 0.65)                   | <0.001  |
| High-level bicycle commuters (>=5 days)   | 0.57 (0.42, 0.77)                   | <0.001  | 0.59 (0.44, 0.80)                   | 0.001   | 0.59 (0.44, 0.80)                   | 0.001   | 0.59 (0.44, 0.80)                   | 0.001   |
| Bicycle commuters propensity              |                                     |         |                                     |         |                                     |         |                                     |         |
| Infrequent bicycle commuters              | 1.00                                |         | 1.00                                |         | 1.00                                |         | 1.00                                |         |
| Frequent bicycle commuters                | 0.54 (0.40, 0.72)                   | <0.001  | 0.55 (0.41, 0.73)                   | <0.001  | 0.54 (0.41, 0.72)                   | <0.001  | 0.54 (0.41, 0.72)                   | <0.001  |
| <b>Non-bicycle commuters sample (384)</b> |                                     |         |                                     |         |                                     |         |                                     |         |
| Bicycle commuters propensity              |                                     |         |                                     |         |                                     |         |                                     |         |
| Unwilling non-bicycle commuters           | 1.00                                |         | 1.00                                |         | 1.00                                |         | 1.00                                |         |
| Willing non-bicycle commuters             | 0.72 (0.56, 0.94)                   | 0.015   | 0.73 (0.57, 0.95)                   | 0.020   | 0.72 (0.56, 0.93)                   | 0.013   | 0.74 (0.57, 0.95)                   | 0.020   |

<sup>a</sup>Unadjusted. <sup>b</sup>Adjusted by Gender, Country of birth, Employed people in household, Chronic disease. <sup>c</sup>Adjusted by Age, Gender, Country of birth, Employed people in household, Chronic disease, Self-perceived health, Moderate-to-Vigorous Physical Activity (MVPA). <sup>d</sup>Adjusted by Age, Gender, Country of birth, Employed people in household, Chronic disease, Self-perceived health, MVPA, Public bicycle stations at work/study, Bikeability at work/study, Bikeability at commute route.

## 1 **DISCUSSION**

### 2 **Summary of results**

3 We evaluated relationships between bicycle commuting and perceived stress while adjusting  
4 for several confounders in a representative sample of adults in Barcelona, Spain. We found  
5 statistically significant inverse relationships between several measures of bicycle commuting  
6 and perceived stress. Bicycle commuters who bicycled four or more days per week had lower  
7 risk of being stressed compared to those who bicycled less or did not bicycle commute at all.  
8 This relationship remained statistically significant in all sensitivity analyses and after  
9 controlling for individual and environmental confounders.

### 11 **Comparison with previous studies**

12 To our knowledge, this study is the first to assess whether a relationship exists between solely  
13 bicycle commuting and perceived stress. A few studies have focused on the relationship  
14 between active commuting (as a combination of both walking and bicycling) and mental  
15 health (6,7,29), but the relationship is still unclear. One study found a positive association of  
16 active commuting with well-being in adults (6), and another with better mental health in only  
17 men (29). Meanwhile, Humphreys and colleagues (7) found a positive relationship between  
18 time spent actively commuting and levels of physical well-being, but not with mental well-  
19 being. The relationship between physical activity and mental health has been studied more. It  
20 has been suggested that physical activity can reduce stress and anxiety on a daily basis while  
21 improving positive self-perception and mood (41–43), and it has been associated with lower  
22 depressive symptomatology and greater emotional well-being (44). These findings suggest  
23 that the physical activity gained during bicycle commuting (31) may act as a mediator in the  
24 relationship between bicycle commuting and perceived stress. Our results are consistent with

1 the general idea that active commuting is associated with better mental health, but in our case  
2 physical activity did not act as a mediator in this relationship. Our sample was composed of  
3 young, healthy, and active participants with relatively low PSS-4 levels of perceived stress,  
4 which might have led to an underestimation of the relationship between PA and perceived  
5 stress.

6  
7 Qualitative research has suggested that choice of travel mode may affect well-being (19). The  
8 quantity of public bicycle (*Bicing*) stations and the amount of greenness has been related to  
9 bicycle commuting propensity (24), which could imply that commuting by bicycle provides  
10 people with more opportunities to “enjoy” or “experience” greenness than commuting in  
11 public transport or a car. At the same time, the availability of green space close to one’s home  
12 has been shown to be related to better self-perceived general health and better mental health  
13 (25,26,45). Therefore, it seems that perceptual and environmental factors related to bicycle  
14 commuting could affect perceived stress, in the way that the more pleasant an environment to  
15 bicycle commuting is, the lower the perceived stress we will get. This general idea is  
16 consistent with our results which show an inverse relationship between perceived stress and  
17 bicycle-friendly environments (public bicycle stations and bikeability levels) in work/study  
18 address area and the commute route. Importantly, the relationship between bicycle commuting  
19 and perceived stress was unchanged after controlling for environmental confounders. Our  
20 results also showed that general attitude might have a role in this relationship, as we have seen  
21 that non-bicycle commuters willing to start bicycle commuting, compared to those unwilling,  
22 had lower risk of being stressed. This becomes unclear, however, as the relationship  
23 approaches statistical non-significance in sensitivity analyses.

1

## 2 **Limitations and strengths**

3 Our study has some limitations. Firstly, our study used a cross-sectional design, which is not  
4 well-suited to assess the direction of causation, and we cannot exclude reverse causality or  
5 residual confounding. It has been suggested that stressed people can engage in unhealthy  
6 behaviours, such as poor dietary practices or a lack of physical activity (46). This reasoning  
7 could be applied to a behaviour like bicycle commuting, where those individuals who are  
8 more stressed would bicycle less. Secondly, our measurement method may be prone to  
9 information bias. With the questionnaire data we could have random misclassification error of  
10 bicycle commuting and PA due to the data being self-reported. Therefore, the risk estimate  
11 and also the potential mediation by PA could be an under-estimation (47). The TAPAS Travel  
12 Survey only measured levels of PA without differentiating between travel PA (being most  
13 accurate for commute studies) and other types of PA (work, recreational). Furthermore, the  
14 modification of the 5-point PSS-4 Likert scale into a 4-point Likert scale could incorrectly-  
15 estimate the perceived stress.

16

17 This study has several strengths, too. The study has high internal validity, with a good  
18 representation of bicycle commuters. Related to participants' characteristics (socio-  
19 demographics), the TAPAS Travel Survey sample is representative of Barcelona's population.  
20 It was compared with data from the Catalan government's Barcelona Active Population  
21 Survey (Statistics and information service, Catalan government 2011) and no statistically  
22 significant differences between participants' deprivation index and home and work population  
23 density in both surveys were found (24,31). Finally, our study in a southern European city has  
24 added evidence on these issues in a different context than the current literature.

25

## 1 **Future research**

2 Our findings underscored the need for future research. There is a need to obtain a clear  
3 understanding of the relationship between bicycle commuting and perceived stress in  
4 longitudinal studies. The role of PA in this relationship seems unclear, and it is likely that  
5 other factors could affect the relationship between these two variables, especially those related  
6 to environmental determinants and personal attitudes. Further work related to determinants  
7 and mediators of bicycle commuting and perceived stress is needed.

## 8 **CONCLUSIONS**

9 We found that healthy, adult bicycle commuters had lower risk of being stressed than  
10 commuters of other transport modes. Also, bicycle commuters who bicycled four or more  
11 days per week had a lower risk of being stressed than those who bicycled less than that.  
12 Environmental determinants such as the number of public bicycle stations and bikeability, and  
13 also personal attitudes, seem to have an influence on this relationship. Further research is  
14 needed in order to disentangle the relationship between bicycle commuting and perceived  
15 stress, and its determinants (individual and environmental) and potential mediators. Our  
16 findings suggest that decision-makers may promote bicycle commuting as a daily routine to  
17 reduce stress levels and improve public health and well-being.

## 1 **ACKNOWLEDGEMENTS**

2 The authors are grateful to the participants of TAPAS Travel Survey and the CREAL  
3 technicians who recruited them and created geographical variables (MEDEA and  
4 environmental determinants). We would like to acknowledge the ESCAPE project and its  
5 contributors for the air quality data of Barcelona, as well as the Ajuntament de Barcelona for  
6 the noise model data and street map information of Barcelona.

## 7 **FUNDING**

8 This study was performed as part of the TAPAS project < <http://www.tapas-program.org/> >,  
9 funded by the Coca-Cola Foundation, the Agència de Gestió d'ajuts Universitaris i de Recerca  
10 (AGAUR) and CREAL internal funding. Coca-Cola Foundation provided funding, but had no  
11 role whatsoever in the design of the study or data collection, or interpretation of the results.

## 12 **COMPETING INTERESTS**

13 There are no conflicts of interest to be reported by the authors of this paper.

## 14 **AUTHOR'S CONTRIBUTION**

15 MJN and AdN obtained the funding and designed the study. IAP conducted the analyses and  
16 drafted this version of the paper and received input from all other authors. All authors read  
17 and commented on the paper and agreed with the final version.

## 18 **DATA SHARING**

19 Extra data is available by emailing the corresponding author (Ione Avila-Palencia:  
20 [ione.avila@isglobal.org](mailto:ione.avila@isglobal.org)).

## 1 REFERENCES

- 2 1. Faulkner GEJ, Buliung RN, Flora PK, Fusco C. Active school transport, physical  
3 activity levels and body weight of children and youth: A systematic review. *Prev Med*.  
4 Elsevier Inc.; 2009;48(1):3–8.
- 5 2. Wanner M, Götschi T, Martin-Diener E, Kahlmeier S, Martin BW. Active Transport,  
6 Physical Activity, and Body Weight in Adults: A Systematic Review. *Am J Prev Med*.  
7 2012;42(5):493–502.
- 8 3. Saunders LE, Green JM, Petticrew MP, Steinbach R, Roberts H, Morris J, et al. What  
9 Are the Health Benefits of Active Travel? A Systematic Review of Trials and Cohort Studies.  
10 Ruiz JR, editor. *PLoS One*. 2013;8(8):e69912.
- 11 4. Hamer M, Chida Y. Active commuting and cardiovascular risk: A meta-analytic  
12 review. *Prev Med*. 2008;46(1):9–13.
- 13 5. Xu H, Wen LM, Rissel C. The relationships between active transport to work or  
14 school and cardiovascular health or body weight: a systematic review. *Asia Pac J Public*  
15 *Health*. 2013 Jul [cited 2016 Nov 7];25(4):298–315.
- 16 6. Martin A, Goryakin Y, Suhrcke M. Does active commuting improve psychological  
17 wellbeing? Longitudinal evidence from eighteen waves of the British Household Panel  
18 Survey. *Prev Med*. 2014;69:296–303.
- 19 7. Humphreys DK, Goodman A, Ogilvie D. Associations between active commuting and  
20 physical and mental wellbeing. *Prev Med*. 2013;57(2):135–9.
- 21 8. Andersen LB, Schnohr P, Schroll M, Hein HO. All-Cause Mortality Associated With  
22 Physical Activity During Leisure Time, Work, Sports, and Cycling to Work. *Arch Intern*  
23 *Med*. 2000;160(11):1621.



- 1  
2  
3 1 9. de Geus B, Van Hoof E, Aerts I, Meeusen R. Cycling to work: influence on indexes of  
4  
5 2 health in untrained men and women in Flanders. *Coronary heart disease and quality of life.*  
6  
7 3 *Scand J Med Sci Sports.* 2008;18(4):498–510.  
8  
9  
10 4 10. de Nazelle A, Nieuwenhuijsen MJ, Antó JM, Brauer M, Briggs D, Braun-Fahrlander  
11  
12 5 C, et al. Improving health through policies that promote active travel: A review of evidence to  
13  
14 6 support integrated health impact assessment. *Environ Int.* 2011;37(4):766–77.  
15  
16 7 11. Cohen S, Kamarck T, Mermelstein R. A global measure of perceived stress. *J Health*  
17  
18 8 *Soc Behav.* 1983;24(4):385–96.  
19  
20 9 12. Katsarou AL, Triposkiadis F, Panagiotakos D. Perceived stress and vascular disease:  
21  
22 10 where are we now? *Angiology.* 2013;64(7):529–34.  
23  
24  
25 11 13. Stroud LR, Salovey P, Epel ES. Sex differences in stress responses: Social rejection  
26  
27 12 versus achievement stress. *Biol Psychiat.* 2002;52(4):318–27.  
28  
29  
30 13 14. Matud MP. Gender differences in stress and coping styles. *Pers Individ Differ.*  
31  
32 14 2004;37(7):1401–15.  
33  
34 15 15. Koslowsky M. Commuting Stress: Problems of Definition and Variable Identification.  
35  
36 16 *Appl Psychol An-Int Rev.* 1997;46(2):153–73.  
37  
38 17 16. St-Louis E, Manaugh K, van Lierop D, El-Geneidy A. The happy commuter: A  
39  
40 18 comparison of commuter satisfaction across modes. *Transportation research. Part F, Traffic*  
41  
42 19 *psychology and behaviour.* 2014;26:160–70.  
43  
44 20 17. Lajeunesse S, Rodríguez D a. Mindfulness, time affluence, and journey-based affect:  
45  
46 21 Exploring relationships. *ransportation research. Part F, Traffic psychology and behaviour.*  
47  
48 22 2012;15(2):196–205.  
49  
50  
51 23 18. Anable J, Gatersleben B. All work and no play? The role of instrumental and affective  
52  
53 24 factors in work and leisure journeys by different travel modes. *Transportation research. Part*  
54  
55 25 *A, Policy and practice.* 2005;39(2–3):163–81.  
56  
57  
58  
59  
60

- 1  
2  
3 1 19. Guell C, Ogilvie D. Picturing commuting: photovoice and seeking wellbeing in  
4  
5 2 everyday travel. *Qual Res.* 2015;15(2):201-218.  
6  
7 3 20. Titze S, Stronegger WJ, Janschitz S, Oja P. Association of built-environment, social-  
8  
9 4 environment and personal factors with bicycling as a mode of transportation among Austrian  
10  
11 5 city dwellers. *Prev Med.* 2008;47(3):252-9.  
12  
13 6 21. Brown BB, Smith KR, Hanson H, Fan JX, Kowaleski-Jones L, Zick CD.  
14  
15 7 Neighborhood design for walking and biking: physical activity and body mass index. *Am J*  
16  
17 8 *Prev Med;* 2013;44(3):231-8.  
18  
19 9 22. Fraser SDS, Lock K. Cycling for transport and public health: a systematic review of  
20  
21 10 the effect of the environment on cycling. *Eur J Public Health.* 2011;21(6).  
22  
23 11 23. Grasser G, Van Dyck D, Titze S, Stronegger W. Objectively measured walkability and  
24  
25 12 active transport and weight-related outcomes in adults: a systematic review. *Int J Public*  
26  
27 13 *Health;* 2013;58(4):615-25.  
28  
29 14 24. Cole-Hunter T, Donaire-Gonzalez D, Curto a., Ambros a., Valentin a., Garcia-  
30  
31 15 Aymerich J, et al. Objective correlates and determinants of bicycle commuting propensity in  
32  
33 16 an urban environment. *Transportation research. Part D Transport and environment.*  
34  
35 17 2015;40(2):132-43.  
36  
37 18 25. Triguero-Mas M, Dadvand P, Cirach M, Martínez D, Medina A, Mompert A, et al.  
38  
39 19 Natural outdoor environments and mental and physical health: Relationships and  
40  
41 20 mechanisms. *Environ Int.* 2015;77:35-41.  
42  
43 21 26. Dadvand P, Bartoll X, Basagaña X, Dalmau-Bueno A, Martinez D, Ambros A, et al.  
44  
45 22 Green spaces and General Health: Roles of mental health status, social support, and physical  
46  
47 23 activity. *Environ Int.* 2016;91:161-7.  
48  
49 24 27. Olsson LE, Gärling T, Ettema D, Friman M, Fujii S. Happiness and Satisfaction with  
50  
51 25 Work Commute. *Soc Indic Res.* 2013;111(1):255-63.  
52  
53  
54  
55  
56  
57  
58  
59  
60

- 1  
2  
3 1 28. Gottholmseder G, Nowotny K, Pruckner GJ, Theurl E. Stress perception and  
4  
5 2 commuting. *Health Econ.* 2009;18(5):559–76.  
6  
7 3 29. Ohta M, Mizoue T, Mishima N, Ikeda M. Effect of the physical activities in leisure  
8  
9 4 time and commuting to work on mental health. *J Occup Health.* 2007;49(1):46–52.  
10  
11 5 30. Hansson E, Mattisson K, Björk J, Östergren P-O, Jakobsson K. Relationship between  
12  
13 6 commuting and health outcomes in a cross-sectional population survey in southern Sweden.  
14  
15 7 *BMC Public Health.* 2011;11:834.  
16  
17 8 31. Donaire-Gonzalez D, Nazelle A De, Cole-Hunter T, Curto A, Rodriguez D, Mendez  
18  
19 9 M, et al. The Added Benefit of Bicycle Commuting on the Regular Amount of Physical  
20  
21 10 Activity Performed. *Am J Prev Med.* 2015;49(6):842–9.  
22  
23 11 32. Institut d’Estudis Regionals i Metropolitans de Barcelona. La Mobilitat quotidiana a  
24  
25 12 Catalunya. *Papers. Regió Metropolitana de Barcelona* 2008.  
26  
27 13 33. Forsyth A, Krizek KJ, Agrawal AW, Stonebraker E. Reliability testing of the  
28  
29 14 Pedestrian and Bicycling Survey (PABS) method. *J Phys Act Health.* 2012;9(5):677–88.  
30  
31 15 34. Warttig SL, Forshaw MJ, South J, White AK. New, normative, English-sample data  
32  
33 16 for the Short Form Perceived Stress Scale (PSS-4). *J Health Psychol.* 2013;18(12):1617–28.  
34  
35 17 35. Craig CL, Marshall AL, Sjostrom M, Bauman AE, Booth ML, Ainsworth BE.  
36  
37 18 International physical activity questionnaire: 12-country reliability and validity. *Med Sci*  
38  
39 19 *Sport Exerc.* 2003;35(8):1381–95.  
40  
41 20 36. Domínguez-Berjón MF, Borrell C, Cano-Serral G, Esnaola S, Nolasco A, Pasarín MI,  
42  
43 21 et al. [Constructing a deprivation index based on census data in large Spanish cities (the  
44  
45 22 MEDEA project)]. *Gac Sanit.* 2008 Jun;22(3):179–87.  
46  
47 23 37. Beelen R, Hoek G, Vienneau D, Eeftens M, Dimakopoulou K, Pedeli X, et al.  
48  
49 24 Development of NO<sub>2</sub> and NO<sub>x</sub> land use regression models for estimating air pollution  
50  
51  
52  
53  
54  
55  
56  
57  
58  
59  
60

- 1 exposure in 36 study areas in Europe – The ESCAPE project. *Atmospheric Environment*.  
2 2013 Jun;72(2):10–23.
- 3 38. World Health Organisation. *Guideline for Community Noise*. 2011.  
4 <http://www.who.int/docstore/peh/noise/Commnoise4.htm> (accessed 10 April 2015).
- 5 39. Winters M, Brauer M, Setton EM, Teschke K. Mapping bikeability: A spatial tool to  
6 support sustainable travel. *Environ Plan B Plan Des*. 2013;40(5):865–83.
- 7 40. Hastie TJ, Tibshirani R. Generalized additive models. *Stat Sci*. 1990;1(3):297–318.
- 8 41. Fox KR. The influence of physical activity on mental well-being. *Public Health Nutr*.  
9 1999;2(3A):411–8.
- 10 42. Sexton H, Sogaard a. J, Olstad R. How are mood and exercise related? Results from  
11 the Finnmark study. *Soc Psych Psych Epid*. 2001;36(7):348–53.
- 12 43. Peluso MA, Guerra de Andrade LH. Physical activity and mental health: the  
13 association between exercise and mood. *Clinics (Sao Paulo)*. 2005;60(1):61–70.
- 14 44. Galper DI, Trivedi MH, Barlow CE, Dunn AL, Kampert JB. Inverse association  
15 between physical inactivity and mental health in men and women. *Med Sci Sports Exerc*.  
16 2006;38(1):173–8.
- 17 45. Maas J, Verheij RA, Groenewegen PP, De Vries S, Spreeuwenberg P. Green space,  
18 urbanity, and health: how strong is the relation? *J Epidemiol Community Health*.  
19 2006;60(7):587–92.
- 20 46. Stults-Kolehmainen MA, Sinha R. The effects of stress on physical activity and  
21 exercise. *Sports Med*. 2014;44(1):81–121.
- 22 47. Baron RM, Kenny D a. The moderator-mediator variable distinction in social  
23 psychological research: conceptual, strategic, and statistical considerations. *J Pers Soc*  
24 *Psychol*. 1986;51(6):1173–82.
- 25

## SUPPLEMENTARY MATERIAL

**Table S1.** PSS4 questions used in TAPAS Travel Survey

**Q218.** In the last month, how often have you felt that you were unable to control important things in your life?

- 0** *Never*
- 1** *Almost never*
- 2** *Nearly always*
- 3** *Always*
- 997** Don't Know
- 998** Refuse to Answer

**Q219.** In the last month, how often have you felt confident about your ability to handle your personal problems?

- 0** *Never*
- 1** *Almost never*
- 2** *Nearly always*
- 3** *Always*
- 997** Don't Know
- 998** Refuse to Answer

**Q220.** In the last month, how often have you felt that things were going your way?

- 0** *Never*
- 1** *Almost never*
- 2** *Nearly always*
- 3** *Always*
- 997** Don't Know
- 998** Refuse to Answer

**Q221.** In the last month, how often have you felt that difficulties were piling up so high that you could not overcome them?

- 0** *Never*
- 1** *Almost never*
- 2** *Nearly always*
- 3** *Always*
- 997** Don't Know
- 998** Refuse to Answer

**Table S2.** PSS4 score distribution in TAPAS Travel Survey sample

| PSS-4 score | n   | %      | Cumulative % |
|-------------|-----|--------|--------------|
| 0           | 90  | 11.61  | 11.61        |
| 1           | 125 | 16.13  | 27.74        |
| 2           | 129 | 16.65  | 44.39        |
| 3           | 151 | 19.48  | 63.87        |
| 4           | 144 | 18.58  | 82.45        |
| 5           | 38  | 4.90   | 87.35        |
| 6           | 33  | 4.26   | 91.61        |
| 7           | 12  | 1.55   | 93.16        |
| 8           | 28  | 3.61   | 96.77        |
| 9           | 5   | 0.65   | 97.42        |
| 10          | 11  | 1.42   | 98.84        |
| 11          | 3   | 0.39   | 99.23        |
| 12          | 4   | 0.52   | 99.74        |
| 13          | 1   | 0.13   | 99.87        |
| 14          | 1   | 0.13   | 100.00       |
| Total       | 775 | 100.00 |              |

**Table S3.** Descriptive analyses of participant perceived stress and its determinants according to bicycle commuting levels and bicycle commuting propensity.

| Variables                                                                    | Bicycle commuting levels |               |             |               |            |               |                      | Bicycle commuting propensity |               |               |               |                  |               |                |               | p-value* |  |
|------------------------------------------------------------------------------|--------------------------|---------------|-------------|---------------|------------|---------------|----------------------|------------------------------|---------------|---------------|---------------|------------------|---------------|----------------|---------------|----------|--|
|                                                                              | Low (109)                |               | Medium (65) |               | High (224) |               | p-value <sup>a</sup> | Unwilling (230)              |               | Willing (160) |               | Infrequent (109) |               | Frequent (289) |               |          |  |
|                                                                              | n                        | %             | n           | %             | n          | %             |                      | n                            | %             | n             | %             | n                | %             | n              | %             |          |  |
| <b>Outcome</b>                                                               |                          |               |             |               |            |               |                      |                              |               |               |               |                  |               |                |               |          |  |
| Stressed (median)(Yes)                                                       | 49                       | 45.37         | 12          | 19.05         | 57         | 26.15         | <0.001               | 107                          | 46.93         | 55            | 34.81         | 49               | 45.37         | 69             | 24.56         | <0.001   |  |
| <b>Individual determinants</b>                                               |                          |               |             |               |            |               |                      |                              |               |               |               |                  |               |                |               |          |  |
| Age (median; P25-P75)                                                        | 36                       | 28-42         | 36          | 28-45         | 35         | 29-41         | 0.777                | 37                           | 30-46         | 36            | 29.5-45       | 36               | 28-42         | 35             | 29-41         | 0.111    |  |
| Total PA – min/week (median; P25-P75)                                        | 494.99                   | 299.99-734.99 | 454.99      | 359.99-689.99 | 484.99     | 339.99-779.99 | 0.567                | 364.99                       | 209.99-600.00 | 404.99        | 209.99-629.99 | 494.99           | 299.99-734.99 | 480.00         | 339.99-744.99 | <0.001   |  |
| MVPA – min/week (median; P25-P75)                                            | 240.00                   | 134.99-480.00 | 294.99      | 189.99-390.00 | 300.00     | 177.49-479.99 | 0.092                | 90.00                        | 0-244.99      | 90.00         | 0-240.00      | 240.00           | 134.99-480.00 | 300.00         | 179.99-450.00 | <0.001   |  |
| VPA – min/week (median; P25-P75)                                             | 120.00                   | 0-224.99      | 90.00       | 0-199.99      | 102.50     | 0-240.00      | 0.386                | 45.00                        | 0-150.00      | 0             | 0-127.50      | 120.00           | 0-224.99      | 90.00          | 225.00        | <0.001   |  |
| Gender (Woman)                                                               | 49                       | 44.95         | 33          | 50.77         | 94         | 41.96         | 0.446                | 151                          | 65.65         | 83            | 51.88         | 49               | 44.95         | 127            | 43.94         | <0.001   |  |
| Country of birth (non-Spanish)                                               | 19                       | 17.59         | 7           | 10.77         | 30         | 13.39         | 0.412                | 16                           | 6.96          | 25            | 15.63         | 19               | 17.59         | 37             | 12.80         | 0.014    |  |
| Working status (Student)                                                     | 17                       | 15.60         | 10          | 15.38         | 24         | 10.71         | 0.364                | 24                           | 10.43         | 29            | 18.13         | 17               | 15.60         | 34             | 11.76         | 0.112    |  |
| Education level (University studies completed or equivalent-level education) | 81                       | 74.31         | 50          | 76.92         | 173        | 77.23         | 0.836                | 161                          | 70.00         | 86            | 53.75         | 81               | 74.31         | 223            | 77.16         | <0.001   |  |
| Living with family/partner                                                   | 88                       | 80.73         | 48          | 75.00         | 172        | 76.79         | 0.622                | 192                          | 83.48         | 135           | 84.38         | 88               | 80.73         | 220            | 76.39         | 0.114    |  |
| Employed people in household (2-5)                                           | 69                       | 63.30         | 35          | 55.56         | 145        | 64.73         | 0.410                | 152                          | 66.09         | 109           | 68.99         | 69               | 63.30         | 180            | 62.72         | 0.568    |  |
| MEDEA index                                                                  |                          |               |             |               |            |               | 0.627                |                              |               |               |               |                  |               |                |               | 0.660    |  |
| 1st tertile (least deprived)                                                 | 35                       | 32.11         | 23          | 35.38         | 75         | 33.48         |                      | 81                           | 35.22         | 49            | 30.63         | 35               | 32.11         | 98             | 33.91         |          |  |
| 2nd tertile                                                                  | 38                       | 34.86         | 27          | 41.54         | 76         | 33.93         |                      | 66                           | 28.70         | 56            | 35.00         | 38               | 34.86         | 103            | 35.64         |          |  |
| 3rd tertile (most deprived)                                                  | 36                       | 33.03         | 15          | 23.08         | 73         | 32.59         |                      | 83                           | 36.09         | 55            | 34.38         | 36               | 33.03         | 88             | 30.45         |          |  |
| Children in household (Yes)                                                  | 31                       | 28.44         | 18          | 28.13         | 79         | 35.27         | 0.340                | 94                           | 40.87         | 57            | 35.85         | 31               | 28.44         | 97             | 33.68         | 0.128    |  |
| Children <3 years in household (Yes)                                         | 3                        | 2.75          | 5           | 7.94          | 20         | 8.93          | 0.114                | 20                           | 8.73          | 16            | 10.00         | 3                | 2.75          | 25             | 8.71          | 0.158    |  |
| Self-perceived health (Very good/Excellent)                                  | 43                       | 39.45         | 27          | 41.54         | 113        | 50.45         | 0.123                | 90                           | 39.13         | 50            | 31.25         | 43               | 39.45         | 140            | 48.44         | 0.004    |  |
| BMI (Overweight/Obese)                                                       | 25                       | 22.94         | 14          | 21.54         | 49         | 21.88         | 0.969                | 73                           | 31.88         | 51            | 32.08         | 25               | 22.94         | 63             | 21.8          | 0.021    |  |
| Chronic disease (Yes)                                                        | 11                       | 10.09         | 8           | 12.31         | 17         | 7.59          | 0.458                | 18                           | 7.83          | 7             | 4.38          | 11               | 10.09         | 25             | 8.65          | 0.293    |  |
| Stress releasing (Agreement)                                                 | 95                       | 87.16         | 62          | 98.41         | 199        | 90.05         | 0.047                | 163                          | 72.44         | 139           | 89.68         | 95               | 87.16         | 261            | 91.90         | <0.001   |  |
| Bicycle trip enjoyment (Agreement)                                           | 103                      | 94.50         | 65          | 100.00        | 212        | 95.93         | 0.175                | 116                          | 51.79         | 133           | 84.71         | 103              | 94.50         | 277            | 96.85         | <0.001   |  |
| <b>Environmental determinants</b>                                            |                          |               |             |               |            |               |                      |                              |               |               |               |                  |               |                |               |          |  |
| Commute distance, estimated (km) (mean;SD)                                   | 3.73                     | 1.97          | 3.43        | 1.70          | 3.13       | 1.52          | 0.044                | 4.42                         | 2.35          | 4.32          | 2.11          | 3.73             | 1.97          | 3.20           | 1.56          | <0.001   |  |
| Public bicycle stations (mean;SD)                                            |                          |               |             |               |            |               |                      |                              |               |               |               |                  |               |                |               |          |  |
| Home, count in 400m buffer                                                   | 4.61                     | 2.61          | 4.97        | 2.63          | 4.75       | 2.35          | 0.492                | 3.77                         | 2.53          | 3.72          | 2.49          | 4.61             | 2.61          | 4.80           | 2.41          | <0.001   |  |
| Work/study, count in 400m buffer                                             | 4.89                     | 2.96          | 5.89        | 3.11          | 5.39       | 3.05          | 0.124                | 4.36                         | 2.96          | 4.71          | 3.35          | 4.89             | 2.96          | 5.50           | 3.06          | <0.001   |  |
| Greenness, NDVI (mean;SD)                                                    |                          |               |             |               |            |               |                      |                              |               |               |               |                  |               |                |               |          |  |
| Home, average of 400m buffer                                                 | 0.83                     | 1.30          | 0.75        | 0.98          | 0.59       | 0.94          | 0.635                | 0.90                         | 1.03          | 0.91          | 1.16          | 0.83             | 1.30          | 0.62           | 0.95          | 0.002    |  |
| Work/study, average of 400m buffer                                           | 0.60                     | 0.82          | 0.37        | 0.57          | 0.58       | 0.90          | 0.136                | 0.68                         | 1.11          | 0.74          | 1.01          | 0.60             | 0.82          | 0.53           | 0.84          | 0.328    |  |
| Commute route, average of RBA                                                | 0.95                     | 0.94          | 0.76        | 0.83          | 0.87       | 0.81          | 0.322                | 1.10                         | 1.11          | 1.02          | 0.98          | 0.95             | 0.94          | 0.84           | 0.81          | 0.236    |  |
| NO <sub>2</sub> ppb (mean;SD)                                                |                          |               |             |               |            |               |                      |                              |               |               |               |                  |               |                |               |          |  |
| Home, concentration in 400m buffer                                           | 74.76                    | 18.70         | 77.24       | 16.14         | 78.40      | 17.90         | 0.186                | 75.59                        | 17.08         | 74.51         | 17.20         | 74.76            | 18.70         | 78.14          | 17.49         | 0.063    |  |
| Work/study, concentration in 400m buffer                                     | 76.49                    | 21.63         | 83.02       | 18.82         | 77.81      | 21.37         | 0.091                | 78.50                        | 23.84         | 78.64         | 24.11         | 76.49            | 21.63         | 79.00          | 20.90         | 0.727    |  |
| Commute route, concentration in RBA                                          | 82.86                    | 16.10         | 87.47       | 15.22         | 84.51      | 18.08         | 0.127                | 85.22                        | 17.34         | 82.76         | 15.95         | 82.86            | 16.10         | 85.19          | 17.48         | 0.296    |  |
| Noise, >55dB (mean;SD)                                                       |                          |               |             |               |            |               |                      |                              |               |               |               |                  |               |                |               |          |  |
| Home, proportion in 400m buffer                                              | 78.73                    | 13.39         | 77.65       | 9.77          | 78.63      | 11.54         | 0.554                | 79.03                        | 11.00         | 78.39         | 11.01         | 78.73            | 13.39         | 78.41          | 11.16         | 0.847    |  |
| Work/study, proportion in 400m buffer                                        | 81.64                    | 13.60         | 80.04       | 13.80         | 79.32      | 15.04         | 0.468                | 78.46                        | 15.47         | 80.00         | 13.94         | 81.64            | 13.60         | 79.48          | 14.75         | 0.434    |  |
| Commute route, proportion in RBA                                             | 78.62                    | 9.13          | 75.40       | 9.26          | 77.21      | 9.64          | 0.057                | 77.12                        | 8.43          | 78.08         | 8.78          | 78.62            | 9.13          | 76.80          | 9.57          | 0.160    |  |
| Bikeability (mean;SD)                                                        |                          |               |             |               |            |               |                      |                              |               |               |               |                  |               |                |               |          |  |
| Home, concentration in 400m buffer                                           | 6.29                     | 1.44          | 6.49        | 1.23          | 6.54       | 1.27          | 0.330                | 5.88                         | 1.45          | 6.00          | 1.45          | 6.29             | 1.44          | 6.53           | 1.26          | <0.001   |  |
| Work/study, concentration in 400m buffer                                     | 6.82                     | 1.28          | 6.88        | 0.98          | 6.75       | 1.17          | 0.638                | 6.21                         | 1.58          | 6.46          | 1.47          | 6.82             | 1.28          | 6.78           | 1.13          | <0.001   |  |
| Commute route, concentration in RBA                                          | 6.77                     | 1.10          | 7.02        | 0.93          | 6.99       | 0.93          | 0.236                | 6.36                         | 1.22          | 6.58          | 1.16          | 6.77             | 1.10          | 7.00           | 0.93          | <0.001   |  |

PA, Physical Activity; MVPA, Moderate-to-Vigorous Physical Activity; VPA, Vigorous Physical Activity; MEDEA, Mortalidad en áreas pequeñas Españolas y Desigualdades socioEconómicas y Ambientales, in Spanish (Environmental and socioEconomic Inequalities in Mortality in small Spanish areas, translated to English); BMI, Body Mass Index; NDVI, Normalized Difference Vegetation Index; RBA, Route-By-Area. Data are n and %, unless otherwise noted. There are missing data in: Perceived stress (13; 1.65%), Total PA (5; 0.63%), Country of birth (1; 0.13%), Living with family/partner (1; 0.13%), Employed people in household (4; 0.51), Children in household (2; 0.25%), Children <3years old in household (3; 0.38), BMI (2; 0.25%), Stress releasing (15; 1.90%), Bicycle trip enjoyment (12; 1.52%), Commute distance (20; 2.54%), Greenness (20; 2.54%), NO<sub>2</sub> (20; 2.54%). <sup>a</sup>Chi square test, except for Age, Total PA, MVPA, VPA, and all the Environmental determinants (U Mann Whitney test).

**Table S4.** Sensitivity bivariate analyses of the relationship between participant determinants and perceived stress (P75, P90).

| Variable                                                                     | Perceived stress (P75) |         | Perceived stress (P90) |         |
|------------------------------------------------------------------------------|------------------------|---------|------------------------|---------|
|                                                                              | RR (95% CI)            | p-value | RR (95% CI)            | p-value |
| <b>Individual determinants</b>                                               |                        |         |                        |         |
| Age                                                                          | 1.00 (0.99, 1.02)      | 0.793   | 1.00 (0.97, 1.02)      | 0.662   |
| Total PA - min/week                                                          | 1.00 (0.99, 1.00)      | 0.113   | 1.00 (0.99, 1.00)      | 0.802   |
| MVPA - min/week                                                              | 1.00 (0.99, 1.00)      | 0.197   | 1.00 (0.99, 1.00)      | 0.701   |
| VPA - min/week                                                               | 1.00 (0.99, 1.00)      | 0.382   | 1.00 (0.99, 1.00)      | 0.743   |
| Gender (Woman)                                                               | 1.41 (1.03, 1.93)      | 0.032   | 1.69 (1.04, 2.76)      | 0.035   |
| Country of birth (non-Spanish)                                               | 1.16 (0.75, 1.78)      | 0.515   | 1.14 (0.58, 2.24)      | 0.695   |
| Working status (Student)                                                     | 1.46 (0.99, 2.14)      | 0.051   | 1.04 (0.53, 2.04)      | 0.904   |
| Education level (University studies completed or equivalent-level education) | 0.78 (0.57, 1.07)      | 0.119   | 0.80 (0.49, 1.30)      | 0.369   |
| Living with family/partner                                                   | 1.00 (0.68, 1.47)      | 0.987   | 0.94 (0.53, 1.68)      | 0.841   |
| Employed people in household (2-5)                                           | 0.67 (0.50, 0.91)      | 0.011   | 0.75 (0.47, 1.20)      | 0.231   |
| MEDEA index                                                                  |                        |         | 1.00                   |         |
| 1st tertile (least deprived)                                                 | 1.00                   |         |                        |         |
| 2nd tertile                                                                  | 1.42 (0.96, 2.11)      | 0.081   | 1.85 (0.99, 3.46)      | 0.054   |
| 3rd tertile (most deprived)                                                  | 1.45 (0.97, 2.14)      | 0.067   | 1.77 (0.94, 3.33)      | 0.076   |
| Children in household (Yes)                                                  | 1.05 (0.76, 1.44)      | 0.778   | 0.92 (0.56, 1.51)      | 0.743   |
| Children <3 years in household (Yes)                                         | 0.61 (0.30, 1.25)      | 0.180   | 0.54 (0.17, 1.68)      | 0.289   |
| Self-perceived health (Very good/Excellent)                                  | 0.65 (0.47, 0.91)      | 0.011   | 0.88 (0.55, 1.42)      | 0.604   |
| BMI (Overweight/Obese)                                                       | 1.08 (0.77, 1.51)      | 0.664   | 1.03 (0.61, 1.73)      | 0.922   |
| Chronic disease (Yes)                                                        | 1.58 (1.01, 2.48)      | 0.047   | 1.66 (0.83, 3.32)      | 0.150   |
| Stress releasing (Agreement)                                                 | 0.85 (0.57, 1.27)      | 0.423   | 0.94 (0.49, 1.79)      | 0.850   |
| Bicycle trip enjoyment (Agreement)                                           | 0.74 (0.52, 1.04)      | 0.085   | 0.79 (0.46, 1.37)      | 0.409   |
| <b>Environmental determinants</b>                                            |                        |         |                        |         |
| Commute distance, estimated (km)                                             | 1.07 (0.99, 1.14)      | 0.053   | 1.03 (0.92, 1.15)      | 0.620   |
| Public bicycle stations                                                      |                        |         |                        |         |
| Home, count in 400m buffer                                                   | 0.99 (0.93, 1.06)      | 0.770   | 0.94 (0.84, 1.04)      | 0.253   |
| Work/study, count in 400m buffer                                             | 0.96 (0.91, 1.01)      | 0.103   | 0.96 (0.89, 1.03)      | 0.242   |
| Greenness, NDVI                                                              |                        |         |                        |         |
| Home, average of 400m buffer                                                 | 0.95 (0.79, 1.14)      | 0.557   | 1.04 (0.81, 1.33)      | 0.768   |
| Work/study, average of 400m buffer                                           | 1.09 (0.94, 1.27)      | 0.262   | 0.99 (0.74, 1.32)      | 0.936   |
| Commute route, average of RBA                                                | 1.04 (0.88, 1.22)      | 0.655   | 1.18 (0.95, 1.47)      | 0.138   |
| NO <sub>2</sub> , ppb                                                        |                        |         |                        |         |
| Home, concentration in 400m buffer                                           | 1.00 (0.99, 1.00)      | 0.390   | 1.00 (0.98, 1.01)      | 0.728   |
| Work/study, concentration in 400m buffer                                     | 0.99 (0.99, 1.00)      | 0.042   | 0.99 (0.98, 1.00)      | 0.076   |
| Commute route, concentration in RBA                                          | 1.00 (0.99, 1.01)      | 0.474   | 0.99 (0.97, 1.00)      | 0.138   |
| Noise, >55dB                                                                 |                        |         |                        |         |
| Home, proportion in 400m buffer                                              | 1.01 (0.99, 1.02)      | 0.483   | 1.00 (0.98, 1.03)      | 0.845   |
| Work/study, proportion in 400m buffer                                        | 1.00 (0.99, 1.01)      | 0.549   | 1.00 (0.98, 1.02)      | 0.835   |
| Commute route, proportion in RBA                                             | 1.00 (0.98, 1.01)      | 0.854   | 1.01 (0.98, 1.04)      | 0.444   |
| Bikeability                                                                  |                        |         |                        |         |
| Home, concentration in 400m buffer                                           | 0.97 (0.87, 1.08)      | 0.532   | 0.92 (0.78, 1.09)      | 0.356   |
| Work/study, concentration in 400m buffer                                     | 0.92 (0.82, 1.02)      | 0.108   | 0.89 (0.75, 1.07)      | 0.216   |
| Commute route, concentration in RBA                                          | 0.88 (0.77, 1.00)      | 0.055   | 0.81 (0.66, 0.99)      | 0.042   |

PA, Physical Activity; MVPA, Moderate-to-Vigorous Physical Activity; VPA, Vigorous Physical Activity; MEDEA, Mortalidad en áreas pequeñas Españolas y Desigualdades socioEconómicas y Ambientales, in Spanish (Environmental and socioEconomic Inequalities in Mortality in small Spanish areas, translated to English); BMI, Body Mass Index; NDVI, Normalized Difference Vegetation Index; RBA, Route-By-Area. Complete case analysis excluding missing data of the variables of final models (Table S5; n=771). The variables that still present missing data and are not included in the final models are: Total PA (5; 0.63%), People living with in household (1; 0.13%), Children in household (2; 0.25%), Children <3years old in household (3; 0.38), BMI (2; 0.25%); Stress releasing (15; 1.90%), Bicycle trip enjoyment (12; 1.52%), Commute distance (20; 2.54%), Greenness (20; 2.54%), NO<sub>2</sub> (20; 2.54%).



Table S5. Sensitivity analyses with multivariate models assessing the relationship between bicycle commuting and participant perceived stress (P75, P90).

1  
2  
3  
4  
5  
6  
7  
8  
9  
10  
11  
12  
13  
14  
15  
16  
17  
18  
19  
20  
21  
22  
23  
24  
25  
26  
27  
28  
29  
30  
31  
32  
33  
34  
35  
36  
37  
38  
39  
40  
41  
42  
43  
44  
45  
46  
47  
48  
49

| Variable                                  | Perceived stress (P75)              |         |                                     |         |                                     |         |                                     |         | Perceived stress (P90)              |         |                                     |         |                                     |         |                                     |         |
|-------------------------------------------|-------------------------------------|---------|-------------------------------------|---------|-------------------------------------|---------|-------------------------------------|---------|-------------------------------------|---------|-------------------------------------|---------|-------------------------------------|---------|-------------------------------------|---------|
|                                           | Model 1 <sup>a</sup><br>RR (95% CI) | p-value | Model 2 <sup>b</sup><br>RR (95% CI) | p-value | Model 3 <sup>c</sup><br>RR (95% CI) | p-value | Model 4 <sup>d</sup><br>RR (95% CI) | p-value | Model 1 <sup>a</sup><br>RR (95% CI) | p-value | Model 2 <sup>b</sup><br>RR (95% CI) | p-value | Model 3 <sup>c</sup><br>RR (95% CI) | p-value | Model 4 <sup>d</sup><br>RR (95% CI) | p-value |
| <b>All sample (771)</b>                   |                                     |         |                                     |         |                                     |         |                                     |         |                                     |         |                                     |         |                                     |         |                                     |         |
| Bicycle commuting status                  |                                     |         |                                     |         |                                     |         |                                     |         |                                     |         |                                     |         |                                     |         |                                     |         |
| Non-bicycle commuters                     | 1.00                                |         | 1.00                                |         | 1.00                                |         | 1.00                                |         | 1.00                                |         | 1.00                                |         | 1.00                                |         | 1.00                                |         |
| Bicycle commuters                         | 0.58 (0.42, 0.79)                   | 0.001   | 0.58 (0.42, 0.79)                   | 0.001   | 0.61 (0.44, 0.85)                   | 0.004   | 0.64 (0.46, 0.90)                   | 0.011   | 0.54 (0.33, 0.89)                   | 0.014   | 0.56 (0.34, 0.93)                   | 0.025   | 0.52 (0.31, 0.88)                   | 0.014   | 0.56 (0.33, 0.95)                   | 0.032   |
| Bicycle commuting levels                  |                                     |         |                                     |         |                                     |         |                                     |         |                                     |         |                                     |         |                                     |         |                                     |         |
| Non-bicycle commuters (0 days)            | 1.00                                |         | 1.00                                |         | 1.00                                |         | 1.00                                |         | 1.00                                |         | 1.00                                |         | 1.00                                |         | 1.00                                |         |
| Low-level bicycle commuters (1-3 days)    | 1.04 (0.71, 1.54)                   | 0.832   | 1.03 (0.70, 1.53)                   | 0.868   | 1.08 (0.73, 1.59)                   | 0.708   | 1.10 (0.74, 1.64)                   | 0.626   | 1.20 (0.68, 2.11)                   | 0.535   | 1.22 (0.68, 2.21)                   | 0.505   | 1.14 (0.63, 2.07)                   | 0.662   | 1.18 (0.65, 2.14)                   | 0.589   |
| Medium-level bicycle commuters (4 days)   | 0.22 (0.07, 0.66)                   | 0.007   | 0.20 (0.07, 0.62)                   | 0.005   | 0.21 (0.07, 0.65)                   | 0.007   | 0.22 (0.07, 0.68)                   | 0.009   | 0.15 (0.02, 1.05)                   | 0.056   | 0.14 (0.02, 1.00)                   | 0.050   | 0.14 (0.02, 0.95)                   | 0.044   | 0.15 (0.02, 1.04)                   | 0.054   |
| High-level bicycle commuters (>=5 days)   | 0.45 (0.29, 0.70)                   | <0.001  | 0.46 (0.30, 0.72)                   | 0.001   | 0.50 (0.32, 0.78)                   | 0.003   | 0.52 (0.33, 0.82)                   | 0.005   | 0.34 (0.16, 0.70)                   | 0.004   | 0.36 (0.17, 0.75)                   | 0.006   | 0.33 (0.15, 0.69)                   | 0.004   | 0.35 (0.17, 0.73)                   | 0.005   |
| Bicycle commuting propensity              |                                     |         |                                     |         |                                     |         |                                     |         |                                     |         |                                     |         |                                     |         |                                     |         |
| Unwilling non-bicycle commuters           | 1.00                                |         | 1.00                                |         | 1.00                                |         | 1.00                                |         | 1.00                                |         | 1.00                                |         | 1.00                                |         | 1.00                                |         |
| Willing non-bicycle commuters             | 0.71 (0.47, 1.06)                   | 0.090   | 0.74 (0.49, 1.10)                   | 0.135   | 0.71 (0.48, 1.06)                   | 0.095   | 0.72 (0.48, 1.08)                   | 0.116   | 0.66 (0.35, 1.22)                   | 0.183   | 0.70 (0.38, 1.30)                   | 0.255   | 0.70 (0.37, 1.30)                   | 0.253   | 0.71 (0.38, 1.35)                   | 0.298   |
| Infrequent bicycle commuters              | 0.92 (0.61, 1.38)                   | 0.684   | 0.92 (0.61, 1.39)                   | 0.695   | 0.94 (0.63, 1.43)                   | 0.788   | 0.97 (0.64, 1.48)                   | 0.890   | 1.03 (0.57, 1.87)                   | 0.926   | 1.07 (0.57, 2.01)                   | 0.831   | 1.00 (0.53, 1.88)                   | 0.991   | 1.04 (0.54, 1.98)                   | 0.915   |
| Frequent bicycle commuters                | 0.35 (0.23, 0.54)                   | <0.001  | 0.36 (0.23, 0.55)                   | <0.001  | 0.38 (0.24, 0.59)                   | <0.001  | 0.40 (0.25, 0.62)                   | <0.001  | 0.25 (0.12, 0.52)                   | <0.001  | 0.27 (0.13, 0.56)                   | <0.001  | 0.25 (0.12, 0.52)                   | <0.001  | 0.27 (0.13, 0.56)                   | <0.001  |
| <b>Bicycle commuters sample (387)</b>     |                                     |         |                                     |         |                                     |         |                                     |         |                                     |         |                                     |         |                                     |         |                                     |         |
| Bicycle commuting levels                  |                                     |         |                                     |         |                                     |         |                                     |         |                                     |         |                                     |         |                                     |         |                                     |         |
| Low-level bicycle commuters (1-3 days)    | 1.00                                |         | 1.00                                |         | 1.00                                |         | 1.00                                |         | 1.00                                |         | 1.00                                |         | 1.00                                |         | 1.00                                |         |
| Medium-level bicycle commuters (4 days)   | 0.21 (0.06, 0.66)                   | 0.008   | 0.19 (0.06, 0.61)                   | 0.005   | 0.19 (0.06, 0.60)                   | 0.005   | 0.19 (0.06, 0.60)                   | 0.004   | 0.12 (0.02, 0.92)                   | 0.041   | 0.11 (0.02, 0.83)                   | 0.032   | 0.11 (0.02, 0.80)                   | 0.028   | 0.11 (0.02, 0.76)                   | 0.026   |
| High-level bicycle commuters (>=5 days)   | 0.43 (0.26, 0.73)                   | 0.002   | 0.44 (0.26, 0.75)                   | 0.002   | 0.44 (0.26, 0.75)                   | 0.002   | 0.44 (0.26, 0.73)                   | 0.002   | 0.28 (0.12, 0.65)                   | 0.003   | 0.28 (0.12, 0.65)                   | 0.003   | 0.27 (0.12, 0.64)                   | 0.003   | 0.27 (0.12, 0.60)                   | 0.001   |
| Bicycle commuters propensity              |                                     |         |                                     |         |                                     |         |                                     |         |                                     |         |                                     |         |                                     |         |                                     |         |
| Infrequent bicycle commuters              | 1.00                                |         | 1.00                                |         | 1.00                                |         | 1.00                                |         | 1.00                                |         | 1.00                                |         | 1.00                                |         | 1.00                                |         |
| Frequent bicycle commuters                | 0.38 (0.23, 0.64)                   | <0.001  | 0.38 (0.23, 0.63)                   | <0.001  | 0.38 (0.23, 0.63)                   | <0.001  | 0.38 (0.23, 0.62)                   | <0.001  | 0.25 (0.11, 0.55)                   | 0.001   | 0.24 (0.11, 0.55)                   | 0.001   | 0.24 (0.10, 0.54)                   | 0.001   | 0.23 (0.11, 0.51)                   | <0.001  |
| <b>Non-bicycle commuters sample (384)</b> |                                     |         |                                     |         |                                     |         |                                     |         |                                     |         |                                     |         |                                     |         |                                     |         |
| Bicycle commuters propensity              |                                     |         |                                     |         |                                     |         |                                     |         |                                     |         |                                     |         |                                     |         |                                     |         |
| Unwilling non-bicycle commuters           | 1.00                                |         | 1.00                                |         | 1.00                                |         | 1.00                                |         | 1.00                                |         | 1.00                                |         | 1.00                                |         | 1.00                                |         |
| Willing non-bicycle commuters             | 0.71 (0.47, 1.06)                   | 0.090   | 0.72 (0.48, 1.07)                   | 0.106   | 0.67 (0.45, 1.00)                   | 0.051   | 0.69 (0.46, 1.03)                   | 0.068   | 0.66 (0.35, 1.22)                   | 0.183   | 0.68 (0.36, 1.26)                   | 0.222   | 0.68 (0.36, 1.26)                   | 0.221   | 0.71 (0.37, 1.36)                   | 0.300   |

<sup>a</sup>Unadjusted. <sup>b</sup>Adjusted by Gender, Country of birth, Employed people in household, Chronic disease. <sup>c</sup>Adjusted by Age, Gender, Country of birth, Employed people in household, Chronic disease, Self-perceived health, Moderate-to-Vigorous Physical Activity (MVPA). <sup>d</sup>Adjusted by Age, Gender, Country of birth, Employed people in household, Chronic disease, Self-perceived health, MVPA, Public bicycle stations at work/study, Bikeability at work/study, Bikeability at commute route.

## STROBE Statement—checklist of items that should be included in reports of observational studies

|                           | Item No | Recommendation                                                                                                                                                                             | Reported in page  |
|---------------------------|---------|--------------------------------------------------------------------------------------------------------------------------------------------------------------------------------------------|-------------------|
| <b>Title and abstract</b> | 1       | (a) Indicate the study's design with a commonly used term in the title or the abstract                                                                                                     | Page 2            |
|                           |         | (b) Provide in the abstract an informative and balanced summary of what was done and what was found                                                                                        | Page 2            |
| <b>Introduction</b>       |         |                                                                                                                                                                                            |                   |
| Background/rationale      | 2       | Explain the scientific background and rationale for the investigation being reported                                                                                                       | Pages 4, 5        |
| Objectives                | 3       | State specific objectives, including any prespecified hypotheses                                                                                                                           | Page 5            |
| <b>Methods</b>            |         |                                                                                                                                                                                            |                   |
| Study design              | 4       | Present key elements of study design early in the paper                                                                                                                                    | Page 6            |
| Setting                   | 5       | Describe the setting, locations, and relevant dates, including periods of recruitment, exposure, follow-up, and data collection                                                            | Pages 6, 7        |
| Participants              | 6       | (a) <i>Cohort study</i> —Give the eligibility criteria, and the sources and methods of selection of participants. Describe methods of follow-up                                            | Pages 6, 7        |
|                           |         | <i>Case-control study</i> —Give the eligibility criteria, and the sources and methods of case ascertainment and control selection. Give the rationale for the choice of cases and controls |                   |
|                           |         | <i>Cross-sectional study</i> —Give the eligibility criteria, and the sources and methods of selection of participants                                                                      |                   |
|                           |         | (b) <i>Cohort study</i> —For matched studies, give matching criteria and number of exposed and unexposed                                                                                   | -                 |
|                           |         | <i>Case-control study</i> —For matched studies, give matching criteria and the number of controls per case                                                                                 |                   |
| Variables                 | 7       | Clearly define all outcomes, exposures, predictors, potential confounders, and effect modifiers. Give diagnostic criteria, if applicable                                                   | Pages 7, 8, 9, 10 |
| Data sources/measurement  | 8*      | For each variable of interest, give sources of data and details of methods of assessment (measurement). Describe comparability of assessment methods if there is more than one group       | Pages 7, 8, 9, 10 |
| Bias                      | 9       | Describe any efforts to address potential sources of bias                                                                                                                                  | Pages 6, 7        |
| Study size                | 10      | Explain how the study size was arrived at                                                                                                                                                  | Pages 6, 7        |
| Quantitative variables    | 11      | Explain how quantitative variables were handled in the analyses. If applicable, describe which groupings were chosen and why                                                               | Pages 7, 8, 9, 10 |
| Statistical methods       | 12      | (a) Describe all statistical methods, including those used to control for confounding                                                                                                      | Page 10           |
|                           |         | (b) Describe any methods used to examine subgroups and interactions                                                                                                                        | Page 10           |
|                           |         | (c) Explain how missing data were addressed                                                                                                                                                | Page 10           |
|                           |         | (d) <i>Cohort study</i> —If applicable, explain how loss to follow-up was addressed                                                                                                        | Page 10           |
|                           |         | <i>Case-control study</i> —If applicable, explain how matching of cases and controls was addressed                                                                                         |                   |
|                           |         | <i>Cross-sectional study</i> —If applicable, describe analytical methods taking account of sampling strategy                                                                               |                   |
|                           |         | (e) Describe any sensitivity analyses                                                                                                                                                      | Pages 7, 8, 10    |

Continued on next page

| <b>Results</b>           |     |                                                                                                                                                                                                              | <b>Reported in page</b>                 |
|--------------------------|-----|--------------------------------------------------------------------------------------------------------------------------------------------------------------------------------------------------------------|-----------------------------------------|
| Participants             | 13* | (a) Report numbers of individuals at each stage of study—eg numbers potentially eligible, examined for eligibility, confirmed eligible, included in the study, completing follow-up, and analysed            | Page 6                                  |
|                          |     | (b) Give reasons for non-participation at each stage                                                                                                                                                         | Page 6                                  |
|                          |     | (c) Consider use of a flow diagram                                                                                                                                                                           | In previous papers                      |
| Descriptive data         | 14* | (a) Give characteristics of study participants (eg demographic, clinical, social) and information on exposures and potential confounders                                                                     | Pages 10, 11, 12, 13, 14                |
|                          |     | (b) Indicate number of participants with missing data for each variable of interest                                                                                                                          | Pages 6, 13, 14                         |
|                          |     | (c) <i>Cohort study</i> —Summarise follow-up time (eg, average and total amount)                                                                                                                             | -                                       |
| Outcome data             | 15* | <i>Cohort study</i> —Report numbers of outcome events or summary measures over time                                                                                                                          | -                                       |
|                          |     | <i>Case-control study</i> —Report numbers in each exposure category, or summary measures of exposure                                                                                                         | -                                       |
|                          |     | <i>Cross-sectional study</i> —Report numbers of outcome events or summary measures                                                                                                                           | Pages 10, 11, 12, 13, 14                |
| Main results             | 16  | (a) Give unadjusted estimates and, if applicable, confounder-adjusted estimates and their precision (eg, 95% confidence interval). Make clear which confounders were adjusted for and why they were included | Pages 15, 16, 17                        |
|                          |     | (b) Report category boundaries when continuous variables were categorized                                                                                                                                    | Pages 7, 8                              |
|                          |     | (c) If relevant, consider translating estimates of relative risk into absolute risk for a meaningful time period                                                                                             | -                                       |
| Other analyses           | 17  | Report other analyses done—eg analyses of subgroups and interactions, and sensitivity analyses                                                                                                               | Pages 3, 4, 5 of Supplementary material |
| <b>Discussion</b>        |     |                                                                                                                                                                                                              |                                         |
| Key results              | 18  | Summarise key results with reference to study objectives                                                                                                                                                     | Page 18                                 |
| Limitations              | 19  | Discuss limitations of the study, taking into account sources of potential bias or imprecision. Discuss both direction and magnitude of any potential bias                                                   | Page 20                                 |
| Interpretation           | 20  | Give a cautious overall interpretation of results considering objectives, limitations, multiplicity of analyses, results from similar studies, and other relevant evidence                                   | Pages 18, 19, 20, 21                    |
| Generalisability         | 21  | Discuss the generalisability (external validity) of the study results                                                                                                                                        | Pages 20                                |
| <b>Other information</b> |     |                                                                                                                                                                                                              |                                         |
| Funding                  | 22  | Give the source of funding and the role of the funders for the present study and, if applicable, for the original study on which the present article is based                                                | Page 22                                 |

\*Give information separately for cases and controls in case-control studies and, if applicable, for exposed and unexposed groups in cohort and cross-sectional studies.

**Note:** An Explanation and Elaboration article discusses each checklist item and gives methodological background and published examples of transparent reporting. The STROBE checklist is best used in conjunction with this article (freely available on the Web sites of PLoS Medicine at <http://www.plosmedicine.org/>, Annals of Internal Medicine at <http://www.annals.org/>, and Epidemiology at <http://www.epidem.com/>). Information on the STROBE Initiative is available at [www.strobe-statement.org](http://www.strobe-statement.org).
